# Supplementary material
Source: PubMed Central journal article supplement (PMC365732)
Supplement: pnas_101_9_2987__1.pdf [file pnas_101_9_2987__1.pdf]

## SUPPORTING DATA SET 1

>gnl|UG|Hs#S3322070 **Homo sapiens matrix metalloproteinase 7** (matrilysin, uterine) (MMP7), mRNA /cds=(48,851) /gb=NM\_002423 /gi=13027804 /ug=Hs.2256 /len=1127

>gnl|UG|Hs#S3219743 **Homo sapiens junctophilin 3** (JPH3), mRNA /cds=(255,2501) /gb=NM\_020655 /gi=21704282 /ug=Hs.4775 /len=3997

>gnl|UG|Hs#S3219164 **Homo sapiens esophageal cancer associated protein** (MGC16824), mRNA /cds=(416,2890) /gb=NM\_020314 /gi=18482378 /ug=Hs.5320 /len=3113

>gnl|UG|Hs#S4807780 **Homo sapiens hypothetical protein FLJ36666** (FLJ36666), mRNA /cds=(35,520) /gb=NM\_152482 /gi=22749014 /ug=Hs.7604 /len=2131

>gnl|UG|Hs#S2294470 **Homo sapiens GK001 protein** (GK001), mRNA /cds=(185,1636) /gb=NM\_020198 /gi=9910241 /ug=Hs.8207 /len=3294

>gnl|UG|Hs#S5978568 **Homo sapiens DKFZP434D1335 protein** (DKFZP434D1335), mRNA /cds=(78,1469) /gb=NM\_015578 /gi=24308092 /ug=Hs.8258 /len=3389

>gnl|UG|Hs#S3219521 **Homo sapiens RNA helicase-related protein** (RNAHP), mRNA /cds=(18,2147) /gb=NM\_007372 /gi=11321631 /ug=Hs.8765 /len=3347

>gnl|UG|Hs#S3219471 **Homo sapiens complement component 1, q subcomponent, beta polypeptide** (C1QB), mRNA /cds=(64,825) /gb=NM\_000491 /gi=11038661 /ug=Hs.8986 /len=1072

>gnl|UG|Hs#S5494967 **Homo sapiens sorting nexin 3** (SNX3), transcript variant 3, mRNA /cds=(326,667) /gb=NM\_152828 /gi=23111042 /ug=Hs.12102 /len=1559

>gnl|UG|Hs#S2140319 **Homo sapiens CGI-147 protein** (CGI-147), mRNA /cds=(128,667) /gb=NM\_016077 /gi=7706350 /ug=Hs.12677 /len=806

>gnl|UG|Hs#S1726209 **Homo sapiens actin, gamma 1** (ACTG1), mRNA /cds=(75,1202) /gb=NM\_001614 /gi=11038618 /ug=Hs.14376 /len=1919

>gnl|UG|Hs#S1731310 **Homo sapiens COP9 subunit 6** (MOV34 homolog, 34 kD) (COPS6), mRNA /cds=(105,998) /gb=NM\_006833 /gi=21359878 /ug=Hs.15591 /len=1148

>gnl|UG|Hs#S3619375 **Homo sapiens hypothetical protein MGC10820** (MGC10820), mRNA /cds=(457,681) /gb=NM\_032648 /gi=14249191 /ug=Hs.18449 /len=959

>gnl|UG|Hs#S2140049 **Homo sapiens comparative gene identification 58** (CGI58), mRNA /cds=(7,1056) /gb=NM\_016006 /gi=7705770 /ug=Hs.19385 /len=1328

>gnl|UG|Hs#S1727443 **Homo sapiens protein phosphatase 1, catalytic subunit, beta isoform** (PPP1CB), mRNA /cds=(259,1242) /gb=NM\_002709 /gi=4506004 /ug=Hs.21537 /len=3590

>gnl|UG|Hs#S2140072 **Homo sapiens HSPC038 protein** (LOC51123), mRNA /cds=(137,367) /gb=NM\_016096 /gi=7705816 /ug=Hs.23528 /len=719

>gnl|UG|Hs#S3547207 **Homo sapiens phospholipase A2, group XII** (PLA2G12), mRNA /cds=(256,825) /gb=NM\_030821 /gi=21361943 /ug=Hs.25206 /len=1708

>gnl|UG|Hs#S2293282 **Homo sapiens hypothetical protein FLJ10300** (FLJ10300), mRNA /cds=(1710,3359) /gb=NM\_018051 /gi=21361686 /ug=Hs.42233 /len=3785

>gnl|UG|Hs#S1728960 **Homo sapiens fatty acid binding protein 3, muscle and heart (mammary-derived growth inhibitor)** (FABP3), mRNA /cds=(46,447) /gb=NM\_004102 /gi=10938020 /ug=Hs.49881 /len=679

>gnl|UG|Hs#S1726296 **Homo sapiens argininosuccinate lyase** (ASL), mRNA /cds=(70,1464) /gb=NM\_000048 /gi=4502256 /ug=Hs.61258 /len=1502

>gnl|UG|Hs#S1727480 **Homo sapiens protein S (alpha) (PROS1)**, mRNA /cds=(147,2177) /gb=NM\_000313 /gi=4506116 /ug=Hs.64016 /len=3309

>gnl|UG|Hs#S3437945 **Homo sapiens mitogen-activated protein kinase kinase 2 (MAP2K2)**, mRNA /cds=(255,1457) /gb=NM\_030662 /gi=21614527 /ug=Hs.72241 /len=1759

>gnl|UG|Hs#S1728144 **Homo sapiens ubiquitin-conjugating enzyme E2N (UBC13 homolog, yeast) (UBE2N)**, mRNA /cds=(64,522) /gb=NM\_003348 /gi=4507792 /ug=Hs.75355 /len=1203

>gnl|UG|Hs#S1729349 **Homo sapiens ubiquitin carboxyl-terminal esterase L1 (ubiquitin thiolesterase) (UCHL1)**, mRNA /cds=(75,746) /gb=NM\_004181 /gi=21361090 /ug=Hs.76118 /len=1119

>gnl|UG|Hs#S5518205 **Homo sapiens casein kinase 1, epsilon (CSNK1E)**, transcript variant 1, mRNA /cds=(233,1483) /gb=NM\_152221 /gi=23199990 /ug=Hs.79658 /len=1559

>gnl|UG|Hs#S2139834 **Homo sapiens hypothetical protein BM-009 (BM-009)**, mRNA /cds=(386,1048) /gb=NM\_016623 /gi=7705303 /ug=Hs.92918 /len=1919

>gnl|UG|Hs#S2139766 **Homo sapiens PTD015 protein (PTD015)**, mRNA /cds=(148,504) /gb=NM\_014040 /gi=7662642 /ug=Hs.95870 /len=620

>gnl|UG|Hs#S3603834 **Homo sapiens testis-specific protein TES101RP (MGC4766)**, mRNA /cds=(561,1364) /gb=NM\_031451 /gi=20127665 /ug=Hs.97978 /len=1605

>gnl|UG|Hs#S3219684 **Homo sapiens FK506 binding protein like (FKBPL)**, mRNA /cds=(265,1314) /gb=NM\_022110 /gi=17149852 /ug=Hs.99134 /len=1379

>gnl|UG|Hs#S1729115 **Homo sapiens metastasis associated 1 (MTA1)**, mRNA /cds=(8,2155) /gb=NM\_004689 /gi=14141149 /ug=Hs.101448 /len=2662

>gnl|UG|Hs#S1727214 **Homo sapiens NADH dehydrogenase (ubiquinone) 1 beta subcomplex, 6, 17kDa (NDUFB6)**, mRNA /cds=(104,490) /gb=NM\_002493 /gi=20149518 /ug=Hs.109646 /len=733

>gnl|UG|Hs#S1824446 **Homo sapiens leucine zipper-EF-hand containing transmembrane protein 1 (LETM1)**, mRNA /cds=(298,2517) /gb=NM\_012318 /gi=6912481 /ug=Hs.120165 /len=3907

>gnl|UG|Hs#S4284762 **Homo sapiens hypothetical protein BC009518 (LOC90799)**, mRNA /cds=(59,2524) /gb=NM\_138363 /gi=19923898 /ug=Hs.135265 /len=2705

>gnl|UG|Hs#S1730282 **Homo sapiens nuclear factor (erythroid-derived 2)-like 2 (NFE2L2)**, mRNA /cds=(114,1931) /gb=NM\_006164 /gi=20149575 /ug=Hs.155396 /len=2439

>gnl|UG|Hs#S1727788 **Homo sapiens chemokine (C-X-C motif) ligand 6 (granulocyte chemotactic protein 2) (CXCL6)**, mRNA /cds=(64,408) /gb=NM\_002993 /gi=4506850 /ug=Hs.164021 /len=1547

>gnl|UG|Hs#S1731058 **Homo sapiens poliovirus receptor (PVR)**, mRNA /cds=(172,1425) /gb=NM\_006505 /gi=19923371 /ug=Hs.171844 /len=3215

>gnl|UG|Hs#S1729935 **Homo sapiens solute carrier family 1 (neutral amino acid transporter), member 5 (SLC1A5)**, mRNA /cds=(591,2216) /gb=NM\_005628 /gi=5032092 /ug=Hs.183556 /len=2856

>gnl|UG|Hs#S2138875 **Homo sapiens neutrophil cytosolic factor 4, 40kDa (NCF4)**, transcript variant 2, mRNA /cds=(157,1203) /gb=NM\_013416 /gi=7382492 /ug=Hs.196352 /len=1421

>gnl|UG|Hs#S2294124 **Homo sapiens MCM10 minichromosome maintenance deficient 10 (S. cerevisiae) (MCM10)**, mRNA /cds=(95,2662) /gb=NM\_018518 /gi=19923533 /ug=Hs.198363 /len=4619

>gnl|UG|Hs#S2138938 **Homo sapiens chromosome 22 open reading frame 2 (C22orf2)**, mRNA /cds=(115,495) /gb=NM\_015373 /gi=21359898 /ug=Hs.227637 /len=1194

>gnl|UG|Hs#S1731210 **Homo sapiens ribosomal protein L14** (RPL14), mRNA /cds=(38,688) /gb=NM\_003973 /gi=16753224 /ug=Hs.235422 /len=843

>gnl|UG|Hs#S1730207 **Homo sapiens ariadne homolog 2 (Drosophila)** (ARIH2), mRNA /cds=(145,1626) /gb=NM\_006321 /gi=5453556 /ug=Hs.241558 /len=3892

>gnl|UG|Hs#S1727552 **Homo sapiens prothymosin, alpha (gene sequence 28)** (PTMA), mRNA /cds=(182,514) /gb=NM\_002823 /gi=21359859 /ug=Hs.250655 /len=1233

>gnl|UG|Hs#S1728284 **Homo sapiens aldolase A, fructose-bisphosphate** (ALDOA), mRNA /cds=(168,1262) /gb=NM\_000034 /gi=4557304 /ug=Hs.273415 /len=1464

>gnl|UG|Hs#S2138743 **Homo sapiens prolactin regulatory element binding** (PREB), mRNA /cds=(132,1385) /gb=NM\_013388 /gi=7019502 /ug=Hs.279784 /len=2059

>gnl|UG|Hs#S2139666 **Homo sapiens KIAA1001 protein** (KIAA1001), mRNA /cds=(459,2036) /gb=NM\_014960 /gi=7662439 /ug=Hs.279937 /len=4304

>gnl|UG|Hs#S3438634 **Homo sapiens RNA processing factor 1** (RPF1), mRNA /cds=(8,1057) /gb=NM\_025065 /gi=18643386 /ug=Hs.287863 /len=1336

>gnl|UG|Hs#S1731856 **Homo sapiens karyopherin alpha 4** (importin alpha 3) (KPNA4), mRNA /cds=(307,1872) /gb=NM\_002268 /gi=27477125 /ug=Hs.288193 /len=3816

>gnl|UG|Hs#S3323004 **Homo sapiens, Similar to neuronal thread protein, clone MGC:2959 IMAGE:3139291**, mRNA, complete cds /cds=(77,262) /gb=BC002534 /gi=12803420 /ug=Hs.306992 /len=1101

>gnl|UG|Hs#S3601614 **Homo sapiens hypothetical protein FLJ23027** (FLJ23027), mRNA /cds=(171,1709) /gb=NM\_032233 /gi=14149937 /ug=Hs.321766 /len=2374

>gnl|UG|Hs#S3619352 **Homo sapiens hypothetical protein MGC10814** (MGC10814), mRNA /cds=(403,519) /gb=NM\_032671 /gi=14249237 /ug=Hs.326741 /len=954

>gnl|UG|Hs#S4631077 **Homo sapiens crystallin, zeta (quinone reductase)-like 1** (CRYZL1), transcript variant 3, mRNA /cds=(86,682) /gb=NM\_145858 /gi=22202615 /ug=Hs.330208 /len=2099

>gnl|UG|Hs#S3940065 **Homo sapiens hypothetical protein MGC19556** (MGC19556), mRNA /cds=(1506,1667) /gb=NM\_033551 /gi=15809039 /ug=Hs.334787 /len=2552

>gnl|UG|Hs#S1731044 **Homo sapiens activated RNA polymerase II transcription cofactor 4** (PC4), mRNA /cds=(57,440) /gb=NM\_006713 /gi=19923783 /ug=Hs.349506 /len=1336

>gnl|UG|Hs#S1727740 **Homo sapiens ribosomal protein S5** (RPS5), mRNA /cds=(54,668) /gb=NM\_001009 /gi=13904869 /ug=Hs.356019 /len=725

>gnl|UG|Hs#S1731106 **Homo sapiens tissue factor pathway inhibitor 2** (TFPI2), mRNA /cds=(57,764) /gb=NM\_006528 /gi=5730090 /ug=Hs.378774 /len=1142

>gnl|UG|Hs#S1726756 **Homo sapiens FK506 binding protein 1A, 12kDa** (FKBP1A), transcript variant 12B, mRNA /cds=(104,430) /gb=NM\_000801 /gi=17149837 /ug=Hs.380080 /len=1578

**LEGEND**

**HuR** Z scores for genes on HuR array  
**IgG1** Z scores for genes on IgG1 array  
**HuR-IgG1** Z differences between genes from HuR minus IgG1 immunoprecipitation

**GB acc#** Accession number  
**UGCluster** Unigene accession number

**Symbol** Gene symbol  
**Name** Gene name

| HuR  | IgG1  | HuR-IgG1 | GB acc#   | UGCluster            | Symbol        | Name                                                                              |
|------|-------|----------|-----------|----------------------|---------------|-----------------------------------------------------------------------------------|
| 9.69 | 1.28  | 8.41     | BC000305  | Hs.3280              | LOC90799      | hypothetical protein BC009518                                                     |
| 8.99 | 1.47  | 7.52     | BC005323  | Hs.182421            | ACTB          | actin, beta                                                                       |
| 8.85 | 1.48  | 7.37     | BC005026  | Hs.423756            | PPP1CB        | protein phosphatase 1, catalytic subunit, beta isoform                            |
| 8.41 | 1.12  | 7.29     | BC015937  | Hs.109643            | ACTB          | actin, beta                                                                       |
| 7.73 | 1.42  | 6.31     | BC019088  | Hs.154332            | ACTB          | actin, beta                                                                       |
| 7.24 | 3.02  | 4.22     | BC012355  | Hs.187958            | ACTG1         | actin, gamma 1                                                                    |
| 7.04 | 1.94  | 5.09     | BC007442  | Hs.14376             | ACTG1         | actin, gamma 1                                                                    |
| 6.93 | 0.64  | 6.29     | BC018445  | Hs.164285            | ACTB          | actin, beta                                                                       |
| 6.93 | 1.76  | 5.17     | BC003550  | Hs.107387            | ACTG1         | actin, gamma 1                                                                    |
| 6.81 | 0.12  | 6.69     | BC005105  | Hs.336927            | ACTB          | actin, beta                                                                       |
| 6.61 | 1.97  | 4.64     | BC017490  | Data not found       | ACTG1         | actin, gamma 1                                                                    |
| 6.46 | 2.26  | 4.21     | BC001341  | Hs.6278              | ACTG1         | actin, gamma 1                                                                    |
| 5.58 | 1.42  | 4.15     | BC002953  | Hs.279881            | GNA-11        | likely ortholog of mouse G protein couple-dreceptor alpha 11                      |
| 5.44 | 0.35  | 5.09     | BC017117  | Hs.155924            | NCF4          | neutrophil cytosolic factor 4, 40kDa                                              |
| 5.42 | 2.10  | 3.32     | BC016031  | Hs.159161            | PTMA          | prothymosin, alpha (gene sequence 28)                                             |
| 5.41 | 2.43  | 2.98     | BC002680  | Hs.380230            | PTMA          | prothymosin, alpha (gene sequence 28)                                             |
| 5.29 | 4.30  | 0.98     | BC008883  | Hs.289072            | PC4           | activated RNA polymerase II transcription cofactor 4                              |
| 5.27 | 0.12  | 5.14     | BC012617  | Hs.378774            | ACTG2         | actin, gamma 2, smooth muscle, enteric                                            |
| 5.16 | 0.51  | 4.65     | BC008407  | In multiple clusters | PCBP2         | poly(rC) binding protein 2                                                        |
| 5.08 | -0.62 | 5.70     | BC011454  | Hs.92186             | UBE2N         | ubiquitin-conjugating enzyme E2N (UBC13 homolog, yeast)                           |
| 4.99 | -0.18 | 5.17     | BC003365  | Hs.75355             | UBE2N         | ubiquitin-conjugating enzyme E2N (UBC13 homolog, yeast)                           |
| 4.88 | 4.50  | 0.38     | BC010853  | Hs.424551            | MGC4766       | hypothetical protein MGC4766 similar to testis specific protein TES101RP          |
| 4.81 | 2.31  | 2.50     | BC011683  | Hs.109752            | DKFZP434D1335 | DKFZP434D1335 protein                                                             |
| 4.69 | -0.32 | 5.02     | BC011642  | Hs.137568            | MTA1          | metastasis associated 1                                                           |
| 4.67 | 3.69  | 0.98     | BC007066  | Hs.11810             | RPS5          | ribosomal protein S5                                                              |
| 4.62 | 1.04  | 3.57     | BC017480  | Hs.91684             | ACTG1         | actin, gamma 1                                                                    |
| 4.55 | 0.40  | 4.15     | BC009308  | Hs.9003              | KIAA1001      | KIAA1001 protein                                                                  |
| 4.43 | 4.11  | 0.32     | BC009631  | Hs.403436            | MMP7          | matrix metalloproteinase 7 (matrilysin, uterine)                                  |
| 4.42 | 2.62  | 1.80     | BC012986  | Hs.153863            | ACTG1         | actin, gamma 1                                                                    |
| 4.37 | -0.77 | 5.14     | NM_030662 | Hs.72241             | MAP2K2        | mitogen-activated protein kinase kinase 2                                         |
| 4.35 | 1.11  | 3.24     | BC017317  | Hs.239718            | ACTG1         | actin, gamma 1                                                                    |
| 4.34 | 2.65  | 1.69     | BC003500  | Hs.18851             | LOC51123      | HSPC038 protein                                                                   |
| 4.30 | 2.87  | 1.43     | BC002717  | Hs.347963            | RNAHP         | RNA helicase-related protein                                                      |
| 4.24 | 0.34  | 3.90     | BC005223  | Hs.99875             | CD9           | CD9 antigen (p24)                                                                 |
| 4.17 | 3.15  | 1.02     | BC000451  | Hs.30035             | PREB          | prolactin regulatory element binding                                              |
| 4.15 | 2.70  | 1.45     | BC008195  | Hs.61258             | ASL           | argininosuccinate lyase                                                           |
| 4.06 | 2.91  | 1.15     | BC015354  | Hs.5565              | FABP3         | fatty acid binding protein 3, muscle and heart (mammary-derived growth inhibitor) |
| 4.05 | 2.55  | 1.50     | BC015028  | Hs.235935            | MGC10814      | hypothetical protein MGC10814                                                     |
| 4.04 | 2.66  | 1.38     | BC020590  | Hs.108408            | C1QB          | complement component 1, q subcomponent, beta polypeptide                          |
| 4.02 | 2.04  | 1.98     | BC006807  | Hs.12677             | CGI-147       | CGI-147 protein                                                                   |

|      |       |      |          |                |                |                                                                      |
|------|-------|------|----------|----------------|----------------|----------------------------------------------------------------------|
| 3.99 | 2.64  | 1.35 | BC000986 | Hs.183556      | SLC1A5         | solute carrier family 1 (neutral amino acid transporter), member 5   |
| 3.97 | 3.07  | 0.90 | BC013980 | Hs.30736       | SERF2          | small EDRK-rich factor 2                                             |
| 3.94 | 2.66  | 1.28 | BC000417 | Hs.5212        | CRYZL1         | crystallin, zeta (quinone reductase)-like 1                          |
| 3.93 | 2.46  | 1.48 | BC004285 | Hs.22222       | CGI-58         | CGI-58 protein                                                       |
| 3.87 | 1.49  | 2.37 | BC004926 | Hs.429142      | NA 4-14-03 32  |                                                                      |
| 3.76 | 1.77  | 1.99 | BC001039 | Hs.6844        | IFITM3         |                                                                      |
| 3.74 | 3.04  | 0.69 | BC002756 | Hs.12040       | PVR            | poliovirus receptor                                                  |
| 3.68 | 0.48  | 3.20 | BC001147 | Hs.241205      | ERH            | enhancer of rudimentary homolog (Drosophila)                         |
| 3.66 | 0.27  | 3.39 | BC022096 | Hs.314295      | MGC10820       | hypothetical protein MGC10820                                        |
| 3.65 | 1.41  | 2.24 | BC008216 | Data not found | FLJ36666       | hypothetical protein FLJ36666                                        |
| 3.53 | 2.87  | 0.66 | BC009960 | Hs.285115      | FTH1           | ferritin, heavy polypeptide 1                                        |
| 3.50 | 2.60  | 0.90 | BC005261 | Hs.334629      | NA 4-14-03 104 |                                                                      |
| 3.46 | 2.18  | 1.28 | BC008651 | Data not found | CXCL6          | chemokine (C-X-C motif) ligand 6 (granulocyte chemotactic protein 2) |
| 3.45 | 2.49  | 0.96 | BC006973 | Hs.285847      |                |                                                                      |
| 3.45 | 0.52  | 2.93 | BC007489 | Hs.12971       | CSNK1E         | casein kinase 1, epsilon                                             |
| 3.43 | 0.02  | 3.41 | BC012745 | Hs.60103       | FLJ10300       | hypothetical protein FLJ10300                                        |
| 3.41 | 0.64  | 2.78 | BC012109 | Hs.93564       | FKBP1A         | FK506 binding protein 1A, 12kDa                                      |
| 3.40 | 2.05  | 1.35 | BC002707 | Hs.288126      | ASC            | apoptosis-associated speck-like protein containing a CARD            |
| 3.38 | 1.80  | 1.58 | BC002813 | Hs.139226      | PROS1          | protein S (alpha)                                                    |
| 3.37 | 2.84  | 0.53 | BC004348 | Hs.210546      | COPS6          | COP9 subunit 6 (MOV34 homolog, 34 kD)                                |
| 3.36 | 3.27  | 0.09 | BC007921 | Hs.192861      | MGC1223        | hypothetical protein MGC1223                                         |
| 3.34 | 2.51  | 0.82 | BC012489 | Hs.111286      | FLJ23027       | hypothetical protein FLJ23027                                        |
| 3.29 | 0.16  | 3.13 | BC000675 | Hs.6449        | BTF3           | basic transcription factor 3                                         |
| 3.28 | 1.21  | 2.07 | BC012938 | Hs.52515       | JPH3           | junctophilin 3                                                       |
| 3.28 | 2.34  | 0.94 | BC008942 | Hs.6904        | NA 4-14-03 518 |                                                                      |
| 3.27 | 1.75  | 1.52 | BC011672 | Hs.129739      | ZFP26          | C3HC4-like zinc finger protein                                       |
| 3.26 | 2.18  | 1.08 | BC002849 | Hs.181271      | MGC16824       | esophageal cancer associated protein                                 |
| 3.24 | 2.02  | 1.22 | BC003516 | Hs.325860      | NA 4-14-03 41  |                                                                      |
| 3.22 | 0.84  | 2.39 | BC008297 | Hs.98593       | MGC19556       | hypothetical protein MGC19556                                        |
| 3.22 | 0.19  | 3.03 | BC002702 | Hs.78457       | PFN1           | profilin 1                                                           |
| 3.22 | 0.31  | 2.90 | BC016582 | Hs.34956       | MRPS5          | mitochondrial ribosomal protein S5                                   |
| 3.21 | 1.73  | 1.48 | BC002362 | Hs.234489      | P17.3          | neuronal protein 17.3                                                |
| 3.20 | -0.98 | 4.19 | BC007304 | Hs.231851      | FLJ11730       | hypothetical protein FLJ11730                                        |
| 3.16 | 1.39  | 1.77 | BC018999 | Hs.42945       | MGC4663        | hypothetical protein MGC4663                                         |
| 3.15 | 0.43  | 2.73 | BC003644 | Hs.95577       | KIAA0801       | RNA helicase                                                         |
| 3.15 | 1.97  | 1.18 | BC012330 | Hs.124840      | U2AF1          | U2(RNU2) small nuclear RNA auxillary factor 1                        |
| 3.14 | -0.76 | 3.90 | BC016754 | Hs.288193      | KPNA4          | karyopherin alpha 4 (importin alpha 3)                               |
| 3.12 | 2.17  | 0.94 | BC007067 | Hs.24427       | MT1L           | metallothionein 1L                                                   |
| 3.11 | 2.19  | 0.92 | BC003159 | Hs.79402       | NA 4-14-03 119 |                                                                      |
| 3.10 | 2.34  | 0.76 | BC010019 | Hs.301756      | SNX3           | sorting nexin 3                                                      |
| 3.07 | 2.11  | 0.96 | BC021236 | Hs.433419      | ALDOA          | aldolase A, fructose-bisphosphate                                    |
| 3.03 | 1.39  | 1.64 | BC004312 | Hs.433326      | C22orf2        | chromosome 22 open reading frame 2                                   |
| 3.01 | 1.91  | 1.10 | BC006106 | Hs.103081      | NA 4-14-03 429 |                                                                      |
| 2.99 | 0.73  | 2.26 | BC008870 | Hs.32352       | SPF30          | splicing factor 30, survival of motor neuron-related                 |
| 2.98 | 1.42  | 1.57 | BC001304 | Hs.12376       | PCLO           | piccino (presynaptic cytomatrix protein)                             |
| 2.96 | 0.03  | 2.92 | BC012611 | Hs.79306       | EIF4E          | eukaryotic translation initiation factor 4E                          |
| 2.90 | 0.17  | 2.73 | BC005343 | Hs.7086        | PTD015         | PTD015 protein                                                       |
| 2.89 | 1.50  | 1.39 | BC003682 | Hs.146409      | CDC42          | cell division cycle 42 (GTP binding protein, 25kDa)                  |
| 2.84 | 0.68  | 2.16 | BC016280 | Hs.5420        | GTF2H4         | general transcription factor IIH, polypeptide 4, 52kDa               |
| 2.83 | 0.31  | 2.52 | BC011892 | Hs.27633       | TMSB4X         | thymosin, beta 4, X chromosome                                       |
| 2.83 | 1.62  | 1.21 | BC005097 | Hs.77257       | NA 4-14-03 431 |                                                                      |
| 2.83 | 1.89  | 0.94 | BC011806 | Hs.29724       | ALOX5AP        | arachidonate 5-lipoxygenase-activating protein                       |
| 2.81 | 2.53  | 0.28 | BC012082 | Hs.8358        | CPSF6          | cleavage and polyadenylation specific factor 6, 68kDa                |

|      |       |      |                |                |                |                                                                                                      |
|------|-------|------|----------------|----------------|----------------|------------------------------------------------------------------------------------------------------|
| 2.80 | 1.47  | 1.33 | BC002683       | Hs.103291      | GOSR2          | golgi SNAP receptor complex member 2                                                                 |
| 2.80 | 1.64  | 1.16 | BC010432       | Data not found | RPF1           | RNA processing factor 1                                                                              |
| 2.79 | 1.24  | 1.55 | BC009801       | Hs.109646      | NDUFB6         | NADH dehydrogenase (ubiquinone) 1 beta subcomplex, 6, 17kDa                                          |
| 2.78 | 1.22  | 1.57 | BC009362       | Hs.440942      | NA 4-14-03 244 |                                                                                                      |
| 2.73 | 1.71  | 1.02 | BC011814       | Hs.273357      | NUFIP1         | nuclear fragile X mental retardation protein interacting protein 1                                   |
| 2.73 | 0.33  | 2.39 | BC011382       | Hs.5056        | NCL            | nucleolin                                                                                            |
| 2.72 | 2.15  | 0.57 | BC016300       | Hs.81256       | S100A4         | S100 calcium binding protein A4 (calcium protein, calvasculin, metastasin, murine placental homolog) |
| 2.71 | 1.94  | 0.77 | BC011363       | Hs.173422      | FUS            | fusion, derived from t(12;16) malignant liposarcoma                                                  |
| 2.70 | 0.84  | 1.86 | BC010007       | Hs.3682        | NA 4-14-03 245 |                                                                                                      |
| 2.69 | 1.86  | 0.83 | BC010044       | Hs.82906       | LOC115761      | hypothetical protein MGC17429                                                                        |
| 2.69 | 0.96  | 1.73 | BC003688       | Hs.367675      | KIAA0632       | KIAA0632 protein                                                                                     |
| 2.68 | 1.90  | 0.78 | BC019359       | Hs.251653      | TUBB2          | tubulin, beta, 2                                                                                     |
| 2.65 | 1.82  | 0.84 | BC002928       | Hs.43299       | MGC2594        | hypothetical protein MGC2594                                                                         |
| 2.64 | 1.72  | 0.92 | Data not found |                | LOC115761      | hypothetical protein MGC17429                                                                        |
| 2.63 | 0.32  | 2.31 | BC010704       | Hs.15744       | PTDSS1         | phosphatidylserine synthase 1                                                                        |
| 2.63 | 1.35  | 1.28 | BC015330       | Hs.187660      | CCL5           | chemokine (C-C motif) ligand 5                                                                       |
| 2.62 | 2.50  | 0.12 | BC008586       | Hs.50848       |                |                                                                                                      |
| 2.59 | -0.21 | 2.80 | BC013142       | Hs.1722        | MGC4737        | KIAA1882 protein                                                                                     |
| 2.59 | 0.68  | 1.91 | BC005197       | Hs.16755       | DKFZP586K0717  | FIP1 like 1 (S. cerevisiae)                                                                          |
| 2.58 | 1.93  | 0.65 | BC000751       | Hs.119140      | EIF5A          | eukaryotic translation initiation factor 5A                                                          |
| 2.57 | 2.23  | 0.34 | BC008880       | Hs.177677      | NARF           | nuclear prelamin A recognition factor                                                                |
| 2.56 | 0.23  | 2.33 | BC002534       | Data not found | NA 4-14-03 78  |                                                                                                      |
| 2.55 | 2.14  | 0.42 | BC006311       | Hs.421907      |                | Homo sapiens cDNA: FLJ21869 fis, clone HEP02442.                                                     |
| 2.54 | 2.46  | 0.08 | BF695725       | Hs.381171      |                | ESTs, Highly similar to YZA1_HUMAN HYPOTHETICAL PROTEIN [H.sapiens]                                  |
| 2.54 | 2.47  | 0.08 | BC002994       | Hs.376253      | PCTP           | phosphatidylcholine transfer protein                                                                 |
| 2.54 | -0.29 | 2.83 | BC006334       | Hs.183255      | MGC7036        | hypothetical protein MGC7036                                                                         |
| 2.54 | 1.06  | 1.48 | BC010124       | Hs.325422      | TCEB1          | transcription elongation factor B (SIII), polypeptide 1 (15kDa, elongin C)                           |
| 2.54 | 2.12  | 0.42 | BC004258       | Hs.70333       | K-ALPHA-1      | tubulin, alpha, ubiquitous                                                                           |
| 2.53 | 1.67  | 0.86 | BC014547       | Hs.118836      | MB             | myoglobin                                                                                            |
| 2.51 | 1.34  | 1.17 | BC011369       | Hs.27445       | GBA            | glucosidase, beta; acid (includes glucosylceramidase)                                                |
| 2.50 | 2.28  | 0.23 | BC006364       | Hs.12570       | TUBB2          | tubulin, beta, 2                                                                                     |
| 2.49 | -0.62 | 3.11 | BC005051       | Hs.101514      | CTPS           | CTP synthase                                                                                         |
| 2.49 | 0.61  | 1.88 | BC009267       | Hs.76084       | MGC17528       |                                                                                                      |
| 2.49 | 0.68  | 1.81 | BC004287       | Hs.141693      | LOC57146       | hypothetical protein from clone 24796                                                                |
| 2.48 | 1.21  | 1.27 | BC005269       | Hs.85050       | GK001          | GK001 protein                                                                                        |
| 2.46 | 0.38  | 2.07 | BC005871       | Hs.334437      | MGC4248        | hypothetical protein MGC4248                                                                         |
| 2.45 | 0.20  | 2.25 | BC010571       | Hs.6194        | CORO1C         | coronin, actin binding protein, 1C                                                                   |
| 2.43 | 1.59  | 0.84 | BC005858       | Hs.287820      | FN1            | fibronectin 1                                                                                        |
| 2.41 | 1.46  | 0.95 | BC002356       | Hs.172609      | LOC115557      | RAC/CDC42 exchange factor                                                                            |
| 2.41 | 0.87  | 1.54 | BC001792       | Hs.288600      | KIAA0101       | KIAA0101 gene product                                                                                |
| 2.41 | 1.37  | 1.04 | BC007984       | Hs.195370      | TSSC1          | tumor suppressing subtransferable candidate 1                                                        |
| 2.40 | -0.14 | 2.54 | BC012026       | Data not found | NA 4-14-03 200 |                                                                                                      |
| 2.40 | 0.37  | 2.03 | BC005949       | Hs.333512      | ALDH1B1        | aldehyde dehydrogenase 1 family, member B1                                                           |
| 2.36 | 0.49  | 1.87 | BC005339       | Hs.381154      | FLJ38663       | hypothetical protein FLJ38663                                                                        |
| 2.36 | 1.72  | 0.64 | BC004267       | Hs.412173      | SSB1           | SPRY domain-containing SOCS box protein SSB-1                                                        |
| 2.36 | 1.51  | 0.85 | BC004255       | Hs.288539      | MSCP           | mitochondrial solute carrier protein                                                                 |
| 2.35 | 1.51  | 0.84 | BC011770       | Hs.75087       | KIAA1972       | KIAA1972 protein                                                                                     |
| 2.35 | 0.52  | 1.83 | BC001009       | Hs.311609      |                |                                                                                                      |
| 2.34 | 1.10  | 1.24 | BC012732       | Hs.146139      | NA 4-14-03 38  |                                                                                                      |
| 2.32 | 0.63  | 1.69 | BC000141       | Hs.79070       | MYC            | v-myc myelocytomatosis viral oncogene homolog (avian)                                                |
| 2.32 | 0.44  | 1.88 | BC014898       | Hs.3376        | NA 4-14-03 312 |                                                                                                      |
| 2.32 | 1.41  | 0.91 | BC001809       | Hs.279450      | MGC3771        | hypothetical protein MGC3771                                                                         |
| 2.31 | 1.77  | 0.54 | BC001963       | Hs.286128      | C20orf98       | chromosome 20 open reading frame 98                                                                  |

|      |       |      |           |                      |                |                                                                       |
|------|-------|------|-----------|----------------------|----------------|-----------------------------------------------------------------------|
| 2.30 | 0.48  | 1.83 | BC005190  | Hs.236642            | NETO2          | neuropilin (NRP) and tolloid (TLL)-like 2                             |
| 2.30 | 1.59  | 0.72 | BC004257  | Hs.350321            | KNSL6          | kinesin family member 2C                                              |
| 2.30 | 0.64  | 1.66 | BC010998  | Hs.239069            | KIAA0793       | FERM, RhoGEF and pleckstrin domain protein 2                          |
| 2.30 | 1.86  | 0.44 | BC011680  | Hs.67991             | SSR4           | signal sequence receptor, delta (translocon-associated protein delta) |
| 2.30 | 0.49  | 1.81 | BC001073  | Hs.7987              | MIZF           | MBD2 (methyl-CpG-binding protein)-interacting zinc finger protein     |
| 2.29 | -0.58 | 2.86 | BC020116  | Hs.263216            | CDCA4          | cell division cycle associated 4                                      |
| 2.28 | -0.38 | 2.66 | BC001311  | Hs.25237             | LOC51337       | mesenchymal stem cell protein DSCD75                                  |
| 2.28 | 0.15  | 2.14 | BC006981  | Hs.278635            | CLIC4          | chloride intracellular channel 4                                      |
| 2.28 | 1.18  | 1.10 | BC000790  | Hs.77631             | GCSH           | glycine cleavage system protein H (aminomethyl carrier)               |
| 2.27 | 0.20  | 2.06 | BC006375  | Hs.173135            | DNASE2         | deoxyribonuclease II, lysosomal                                       |
| 2.24 | 1.92  | 0.32 | BC001253  | Hs.80042             | ALG6           | dolichyl-P-Glc:Man9GlcNAc2-PP-dolichylglucosyltransferase             |
| 2.24 | 0.11  | 2.14 | BC009390  | Hs.144063            | UCHL3          | ubiquitin carboxyl-terminal esterase L3 (ubiquitin thiolesterase)     |
| 2.23 | -0.99 | 3.22 | BC004954  | Hs.431392            | RBBP9          | retinoblastoma binding protein 9                                      |
| 2.23 | 0.54  | 1.69 | BC001232  | Hs.101359            | C6orf32        | chromosome 6 open reading frame 32                                    |
| 2.22 | 0.94  | 1.28 | BC013591  | Hs.102541            | MGC4771        | hypothetical protein MGC4771                                          |
| 2.22 | 0.78  | 1.44 | BC014840  | In multiple clusters | FLJ11029       | hypothetical protein FLJ11029                                         |
| 2.22 | 2.00  | 0.21 | BC011049  | Hs.26670             | HNRPA1         | heterogeneous nuclear ribonucleoprotein A1                            |
| 2.22 | 2.11  | 0.10 | BC009290  | Hs.389107            | ENO3           | enolase 3, (beta, muscle)                                             |
| 2.21 | 2.16  | 0.05 | BC003413  | Hs.69851             | NOLA1          | nucleolar protein family A, member 1 (H/ACA small nucleolar RNPs)     |
| 2.20 | -0.69 | 2.89 | BC002661  | Hs.74070             | PTPN9          | protein tyrosine phosphatase, non-receptor type 9                     |
| 2.20 | 0.89  | 1.30 | BC008585  | Hs.198253            | FLJ20320       | hypothetical protein FLJ20320                                         |
| 2.19 | 0.99  | 1.21 | BC002369  | Hs.433619            | ZNF35          | zinc finger protein 35 (clone HF.10)                                  |
| 2.17 | 0.79  | 1.38 | BC011021  | Hs.198269            | NDUFA3         | NADH dehydrogenase (ubiquinone) 1 alpha subcomplex, 3, 9kDa           |
| 2.16 | 0.74  | 1.42 | BC009782  | Hs.268115            | DJ122O8.2      | hypothetical protein DJ122O8.2                                        |
| 2.15 | 0.32  | 1.83 | BC008899  | Hs.5890              | NA 4-14-03 223 |                                                                       |
| 2.15 | 0.77  | 1.38 | BC001894  | Hs.91448             | FLJ20436       | hypothetical protein FLJ20436                                         |
| 2.14 | 1.24  | 0.90 | BC010160  | Hs.38738             | SPEC1          | small protein effector 1 of Cdc42                                     |
| 2.14 | 1.12  | 1.02 | BC007389  | Hs.389107            | MAX            | MAX protein                                                           |
| 2.14 | 0.65  | 1.49 | BC018663  | Hs.112250            | DFFA           | DNA fragmentation factor, 45kDa, alpha polypeptide                    |
| 2.14 | 0.40  | 1.74 | BC006837  | Hs.7179              | RAD1           | RAD1 homolog (S. pombe)                                               |
| 2.14 | 0.60  | 1.54 | BC000307  | Hs.42826             | LOC144845      | hypothetical protein BC008631                                         |
| 2.14 | 0.93  | 1.21 | BC021969  | Hs.59584             | CSH2           | chorionic somatomammotropin hormone 2                                 |
| 2.13 | 0.39  | 1.74 | BC018788  | Hs.301839            | MRPL30         | mitochondrial ribosomal protein L30                                   |
| 2.11 | 0.60  | 1.51 | BC007198  | Data not found       | KIAA0663       | KIAA0663 gene product                                                 |
| 2.11 | 1.12  | 0.99 | BC001318  | Hs.422336            | RGS19          | regulator of G-protein signalling 19                                  |
| 2.10 | 1.51  | 0.60 | BC008254  | Data not found       | NA 4-14-03 255 |                                                                       |
| 2.10 | 1.02  | 1.08 | BC007647  | Hs.119177            | KIAA1921       | KIAA1921 protein                                                      |
| 2.09 | 0.06  | 2.03 | BC007345  | Hs.431392            | DKFZP566I1024  | DKFZP566I1024 protein                                                 |
| 2.08 | 0.46  | 1.62 | BC007450  | Hs.22937             | KBRAS2         | I-kappa-B-interacting Ras-like protein 2                              |
| 2.08 | -0.02 | 2.09 | BC009010  | Hs.350860            | WTAP           | Wilms' tumour 1-associating protein                                   |
| 2.08 | 0.96  | 1.12 | BC016904  | Hs.78019             | PLEKHB2        | pleckstrin homology domain containing, family B (evectins) member 2   |
| 2.07 | 1.17  | 0.91 | BC002945  | Hs.334802            | DNAJB6         | DnaJ (Hsp40) homolog, subfamily B, member 6                           |
| 2.07 | 1.09  | 0.98 | BC000405  | Hs.173255            | LRRFIP1        | leucine rich repeat (in FLII) interacting protein 1                   |
| 2.07 | 1.47  | 0.60 | BC009200  | Hs.83656             | LOC163233      | similar to Zinc finger protein 93 (Zinc finger protein HTF34)         |
| 2.06 | 0.86  | 1.20 | BC000211  | Hs.421608            | LOC51759       | hepatocellular carcinoma-associated antigen 59                        |
| 2.06 | -0.54 | 2.60 | BC006462  | Hs.81424             | UBL1           | ubiquitin-like 1 (sentrin)                                            |
| 2.06 | 0.65  | 1.41 | BC014394  | Hs.10700             | C20orf106      |                                                                       |
| 2.05 | 0.20  | 1.86 | NM_173562 | Hs.188757            | MGC14254       | hypothetical protein MGC14254                                         |
| 2.05 | 1.54  | 0.51 | BC011900  | Hs.118721            | HIG2           | hypoxia-inducible protein 2                                           |
| 2.05 | 0.56  | 1.49 | BC000093  | Hs.77602             | PSMB10         | proteasome (prosome, macropain) subunit, beta type, 10                |
| 2.05 | 0.74  | 1.31 | BC005195  | Hs.381047            | MRPL24         | mitochondrial ribosomal protein L24                                   |
| 2.05 | 1.51  | 0.54 | BC010570  | Hs.831               | CALM1          | calmodulin 1 (phosphorylase kinase, delta)                            |
| 2.05 | 0.18  | 1.87 | BC007768  | Data not found       | MGC3794        | similar to CG9578 gene product                                        |

|      |       |      |           |                |                |                                                                                           |
|------|-------|------|-----------|----------------|----------------|-------------------------------------------------------------------------------------------|
| 2.04 | 0.23  | 1.82 | BC003354  | Hs.425808      | CALM2          | calmodulin 2 (phosphorylase kinase, delta)                                                |
| 2.04 | 0.20  | 1.83 | BC001161  | Hs.155204      | C1orf8         | chromosome 1 open reading frame 8                                                         |
| 2.04 | -0.13 | 2.16 | BC009970  | Hs.89643       | TXNRD1         | thioredoxin reductase 1                                                                   |
| 2.03 | 0.05  | 1.99 | BC007455  | Hs.136309      | C6orf37        | chromosome 6 open reading frame 37                                                        |
| 2.03 | 0.65  | 1.38 | BC004948  | Data not found | LOC130589      | hypothetical protein BC014916                                                             |
| 2.03 | 0.19  | 1.85 | BC006118  | Hs.66774       | MMP1           | matrix metalloproteinase 1 (interstitial collagenase)                                     |
| 2.03 | 0.77  | 1.26 | BC004420  | Hs.25413       | C20orf52       | chromosome 20 open reading frame 52                                                       |
| 2.02 | 1.88  | 0.14 | BC009259  | Hs.23590       | FLJ33069       | hypothetical protein FLJ33069                                                             |
| 2.01 | 1.21  | 0.80 | BC000383  | Hs.119         | MGC18257       | hypothetical protein MGC18257                                                             |
| 2.00 | 1.28  | 0.72 | BC013352  | Hs.63609       | RNPEPL1        | arginyl aminopeptidase (aminopeptidase B)-like 1                                          |
| 2.00 | 0.56  | 1.44 | BC017714  | Hs.169853      | LIG3           | ligase III, DNA, ATP-dependent                                                            |
| 2.00 | 0.38  | 1.62 | BC000365  | Hs.89578       | GTF2H1         | general transcription factor IIH, polypeptide 1, 62kDa                                    |
| 2.00 | 0.00  | 2.00 | BC002505  | Hs.105465      | SNRPF          | small nuclear ribonucleoprotein polypeptide F                                             |
| 1.99 | 0.94  | 1.06 | BC008396  | Hs.1327        | FKBP1A         | FK506 binding protein 1A, 12kDa                                                           |
| 1.99 | -1.12 | 3.11 | BC008455  | Hs.16187       | LGMN           | legumain                                                                                  |
| 1.99 | -0.72 | 2.71 | BC002964  | Hs.91747       | SMS            | spermine synthase                                                                         |
| 1.98 | 0.97  | 1.01 | BC002826  | Hs.8737        | BIRC2          | baculoviral IAP repeat-containing 2                                                       |
| 1.98 | 0.87  | 1.11 | BC002724  | Hs.13794       | PADI2          | peptidyl arginine deiminase, type II                                                      |
| 1.98 | 0.63  | 1.35 | BC005245  | Hs.46967       | DPP7           |                                                                                           |
| 1.97 | -0.25 | 2.22 | BC008832  | Hs.57301       | SSR3           | signal sequence receptor, gamma (translocon-associated protein gamma)                     |
| 1.96 | 0.20  | 1.76 | NM_006807 | Hs.77254       | SP192          | hypothetical protein SP192                                                                |
| 1.96 | 1.62  | 0.34 | BC003126  | Hs.247741      | NDUFS7         | NADH dehydrogenase (ubiquinone) Fe-S protein 7, 20kDa (NADH-coenzyme Q reductase)         |
| 1.95 | 1.15  | 0.80 | BC000418  | Hs.104925      | IHPK1          | inositol hexaphosphate kinase 1                                                           |
| 1.95 | 1.46  | 0.49 | BC003625  | Hs.737         | ETR101         | immediate early protein                                                                   |
| 1.94 | 1.87  | 0.07 | BC001809  | Hs.279450      | MGC3771        | hypothetical protein MGC3771                                                              |
| 1.93 | 1.12  | 0.81 | BC007047  | Hs.107         | ZFP36L1        | zinc finger protein 36, C3H type-like 1                                                   |
| 1.93 | 1.42  | 0.51 | BC014408  | Hs.31431       | NONO           |                                                                                           |
| 1.93 | 1.39  | 0.53 | BC008445  | Hs.75823       | NA 4-14-03 281 |                                                                                           |
| 1.92 | 1.11  | 0.81 | BC009523  | Hs.172458      | TRIP11         | thyroid hormone receptor interactor 11                                                    |
| 1.91 | -0.35 | 2.26 | NM_004475 | Hs.184488      | ERP70          | protein disulfide isomerase related protein (calcium-binding protein, intestinal-related) |
| 1.90 | 1.58  | 0.32 | BC008090  | Hs.181243      | CASP6          | caspase 6, apoptosis-related cysteine protease                                            |
| 1.90 | -0.25 | 2.15 | BC001883  | Hs.75337       | FLJ10989       | hypothetical protein FLJ10989                                                             |
| 1.90 | 0.42  | 1.47 | BC000610  | Hs.273333      | NCL            | nucleolin                                                                                 |
| 1.89 | 1.67  | 0.22 | BC003536  | Hs.136912      | LYAR           | hypothetical protein FLJ20425                                                             |
| 1.89 | 1.04  | 0.85 | BC000460  | Hs.159425      | HSAJ1454       | sparc/osteonectin, cwcv and kazal-like domains proteoglycan (testican) 3                  |
| 1.88 | 0.27  | 1.61 | BC008244  | Hs.82829       | TGFB3          | transforming growth factor, beta 3                                                        |
| 1.87 | 1.46  | 0.41 | BC006772  | Hs.165590      | RPS13          | ribosomal protein S13                                                                     |
| 1.86 | 0.49  | 1.37 | BC000814  | Hs.90077       | TGIF           | TGFB-induced factor (TALE family homeobox)                                                |
| 1.86 | 1.28  | 0.58 | BC015893  | Hs.154230      | MGC10871       | hypothetical protein similar to RNA-binding protein lark                                  |
| 1.86 | -0.05 | 1.91 | BC000988  | Hs.306995      | MGC5457        | hypothetical protein MGC5457                                                              |
| 1.86 | 0.48  | 1.38 | BC001157  | Hs.56294       | FBL            | fibrillarin                                                                               |
| 1.86 | 1.67  | 0.19 | BC004979  | Hs.73722       | LOC65243       | hypothetical protein LOC65243                                                             |
| 1.86 | 0.44  | 1.42 | BC000087  | Hs.406511      | TIP47          | cargo selection protein (mannose 6 phosphate receptor binding protein)                    |
| 1.86 | 1.84  | 0.02 | BC005216  | Hs.425790      | ETS2           | v-ets erythroblastosis virus E26 oncogene homolog 2 (avian)                               |
| 1.85 | 1.71  | 0.14 | BC000583  | Hs.78769       | RPS17          | ribosomal protein S17                                                                     |
| 1.85 | -0.30 | 2.14 | BC020090  | Hs.52788       | MGC19556       | hypothetical protein MGC19556                                                             |
| 1.84 | 0.68  | 1.16 | BC012828  | Hs.343824      | NM23-H6        | non-metastatic cells 6, protein expressed in (nucleoside-diphosphate kinase)              |
| 1.84 | 1.68  | 0.15 | BC018117  | Hs.2384        | TSNAX          | translin-associated factor X                                                              |
| 1.83 | 1.35  | 0.48 | BC011826  | Hs.239720      | FLJ13614       | hypothetical protein FLJ13614                                                             |
| 1.83 | 0.99  | 0.83 | BC011535  | Hs.26358       | COX15          | COX15 homolog, cytochrome c oxidase assembly protein (yeast)                              |
| 1.82 | 1.11  | 0.72 | BC008960  | Hs.271167      | PIPOX          | pipecolic acid oxidase                                                                    |
| 1.82 | 0.74  | 1.08 | BC011787  | Hs.30868       | AP2M1          | adaptor-related protein complex 2, mu 1 subunit                                           |
| 1.81 | 0.50  | 1.31 | BC009617  | Hs.98855       | BCL7A          | B-cell CLL/lymphoma 7A                                                                    |



|      |       |      |          |                |                |                                                                                                                                          |
|------|-------|------|----------|----------------|----------------|------------------------------------------------------------------------------------------------------------------------------------------|
| 1.81 | 1.52  | 0.28 | BC006111 | Hs.120439      | OPTN           | optineurin                                                                                                                               |
| 1.81 | 0.79  | 1.02 | BC000820 | Hs.433410      | MNAT1          | menage a trois 1 (CAK assembly factor)                                                                                                   |
| 1.80 | 0.27  | 1.53 | BC000171 | Hs.262476      | AMD1           | S-adenosylmethionine decarboxylase 1                                                                                                     |
| 1.80 | -0.29 | 2.09 | BC016663 | Hs.173694      | LOC220070      | hypothetical protein BC004224                                                                                                            |
| 1.80 | -0.15 | 1.95 | BC001284 | Hs.284741      | MGC5149        | hypothetical protein MGC5149                                                                                                             |
| 1.80 | -0.17 | 1.97 | BC007612 | Hs.406455      | TMSB4X         | thymosin, beta 4, X chromosome                                                                                                           |
| 1.80 | 1.22  | 0.58 | BC004349 | Hs.176657      | RPS9           | ribosomal protein S9                                                                                                                     |
| 1.80 | -0.27 | 2.07 | BC006007 | Hs.93235       | MGC3169        | hypothetical protein MGC3169                                                                                                             |
| 1.80 | 0.95  | 0.85 | BC006099 | Hs.321231      | CCBP2          | chemokine binding protein 2                                                                                                              |
| 1.80 | 1.79  | 0.01 | BC009234 | Hs.352392      | FLJ21156       | hypothetical protein FLJ21156                                                                                                            |
| 1.78 | 1.46  | 0.31 | BC004898 | Hs.379815      | AKR1C1         | aldo-keto reductase family 1, member C1 (dihydrodiol dehydrogenase 1; 20-alpha (3-alpha)-hydroxysteroid dehydrogenase)                   |
| 1.78 | 1.06  | 0.71 | BC012140 | Hs.293981      | C1orf33        | chromosome 1 open reading frame 33                                                                                                       |
| 1.77 | 0.49  | 1.28 | BC000162 | Hs.3727        | UNRIP          | unr-interacting protein                                                                                                                  |
| 1.77 | 0.24  | 1.54 | BC003395 | Hs.118797      | UBE2D3         | ubiquitin-conjugating enzyme E2D 3 (UBC4/5 homolog, yeast)                                                                               |
| 1.77 | 0.98  | 0.80 | BC007085 | Hs.90458       | TUBB           | tubulin, beta polypeptide                                                                                                                |
| 1.76 | 0.54  | 1.22 | BC012356 | Hs.90011       | SIGIRR         | single Ig IL-1R-related molecule                                                                                                         |
| 1.76 | -0.06 | 1.82 | BC006503 | Hs.3123        | LLGL2          | lethal giant larvae homolog 2 (Drosophila)                                                                                               |
| 1.76 | 1.07  | 0.69 | BC005314 | Data not found | LBH            | likely ortholog of mouse limb-bud and heart gene                                                                                         |
| 1.76 | 0.59  | 1.17 | BC000798 | Hs.315164      | MGC3038        | hypothetical protein similar to actin related protein 2/3 complex, subunit 5                                                             |
| 1.76 | 0.61  | 1.15 | BC001079 | Hs.240170      | MGC2731        | hypothetical protein MGC2731                                                                                                             |
| 1.75 | 0.75  | 1.01 | BC000322 | Hs.16244       | NA 4-14-03 202 |                                                                                                                                          |
| 1.75 | 1.38  | 0.37 | BC016765 | Hs.424312      | MBLR           | MBLR protein                                                                                                                             |
| 1.75 | 0.52  | 1.23 | BC000385 | Hs.177556      | RGR            | retinal G protein coupled receptor                                                                                                       |
| 1.75 | 0.32  | 1.43 | BC009182 | Hs.285673      | LOC51185       | protein x 0001                                                                                                                           |
| 1.75 | 0.05  | 1.70 | BC015310 | Hs.341806      | RetSDR2        | retinal short-chain dehydrogenase/reductase 2                                                                                            |
| 1.75 | -0.23 | 1.98 | BC010123 | Hs.109150      | DBT            | dihydrolipoamide branched chain transacylase (E2 component of branched chain keto acid dehydrogenase complex; maple syrup urine disease) |
| 1.74 | 0.55  | 1.19 | BC009404 | Hs.77039       | SLC31A1        | solute carrier family 31 (copper transporters), member 1                                                                                 |
| 1.74 | -0.39 | 2.13 | BC005976 | Hs.77273       | GDI2           | GDP dissociation inhibitor 2                                                                                                             |
| 1.74 | 0.74  | 1.00 | BC009830 | Hs.288880      | KPNA3          | karyopherin alpha 3 (importin alpha 4)                                                                                                   |
| 1.73 | 0.77  | 0.97 | BC002796 | Hs.46446       | TALDO1         | transaldolase 1                                                                                                                          |
| 1.73 | 0.58  | 1.15 | BC017096 | Hs.272018      | FLJ20013       | hypothetical protein FLJ20013                                                                                                            |
| 1.73 | 0.36  | 1.37 | BC008636 | Hs.406013      | PXF            | peroxisomal farnesylated protein                                                                                                         |
| 1.73 | 0.37  | 1.36 | BC018164 | Hs.155894      | DAP3           | death associated protein 3                                                                                                               |
| 1.73 | 1.06  | 0.66 | BC005070 | Hs.9015        | MGC10485       | hypothetical protein MGC10485                                                                                                            |
| 1.73 | 1.08  | 0.65 | BC002669 | Hs.239752      | CST7           | cystatin F (leukocystatin)                                                                                                               |
| 1.72 | 0.27  | 1.44 | BC000918 | Hs.288678      | MGC5384        | hypothetical protein MGC5384                                                                                                             |
| 1.71 | 0.33  | 1.38 | BC019337 | Hs.413826      | IGHG3          | immunoglobulin heavy constant gamma 3 (G3m marker)                                                                                       |
| 1.71 | -0.01 | 1.72 | BC008180 | Hs.288771      | DKFZP586A0522  | DKFZP586A0522 protein                                                                                                                    |
| 1.70 | 0.52  | 1.18 | BC009866 | Hs.293981      | CALM2          | calmodulin 2 (phosphorylase kinase, delta)                                                                                               |
| 1.70 | -1.93 | 3.63 | BC002733 | Hs.323817      | NA 4-14-03 94  |                                                                                                                                          |
| 1.69 | 0.47  | 1.22 | BC002359 | Hs.75066       | HZF12          | zinc finger protein 12                                                                                                                   |
| 1.69 | -0.09 | 1.77 | BC007457 | Hs.36237       | TEM7R          | tumor endothelial marker 7-related precursor                                                                                             |
| 1.69 | 0.12  | 1.56 | BC012103 | Hs.154729      | MRPS25         | mitochondrial ribosomal protein S25                                                                                                      |
| 1.68 | 1.62  | 0.07 | BC019314 | Hs.26518       | PHGDH          | phosphoglycerate dehydrogenase                                                                                                           |
| 1.68 | 0.21  | 1.47 | BC008280 | Hs.146688      | PTGES          | prostaglandin E synthase                                                                                                                 |
| 1.68 | 0.58  | 1.10 | BC002335 | Hs.20597       | HCLS1          | hematopoietic cell-specific Lyn substrate 1                                                                                              |
| 1.68 | 1.08  | 0.60 | BC005123 | Hs.59403       | DKFZP434A0131  | DKFZp434A0131 protein                                                                                                                    |
| 1.67 | 0.10  | 1.58 | BC004402 | Hs.44592       | LOC130589      | hypothetical protein BC014916                                                                                                            |
| 1.67 | 0.21  | 1.46 | BC010876 | Hs.28355       | JUN            | v-jun sarcoma virus 17 oncogene homolog (avian)                                                                                          |
| 1.67 | -0.87 | 2.54 | BC011594 | Hs.125133      | STOML2         | stomatolipin-like 2                                                                                                                      |
| 1.67 | -1.19 | 2.86 | BC009871 | Data not found | MGC29761       | hypothetical protein MGC29761                                                                                                            |

|      |       |      |                      |                |                |                                                                                                                                            |
|------|-------|------|----------------------|----------------|----------------|--------------------------------------------------------------------------------------------------------------------------------------------|
| 1.67 | -0.11 | 1.78 | BC000765             | Hs.223394      | MGC2742        | hypothetical protein MGC2742                                                                                                               |
| 1.67 | 0.88  | 0.79 | BC009361             | Hs.82280       | ESM1           | endothelial cell-specific molecule 1                                                                                                       |
| 1.67 | 1.38  | 0.29 | BC007240             | Hs.153959      | NPM1           | nucleophosmin (nucleolar phosphoprotein B23, numatrin)                                                                                     |
| 1.66 | -1.24 | 2.90 | BC010119             | Hs.5662        | MGC21675       | hypothetical protein MGC21675                                                                                                              |
| 1.66 | 0.30  | 1.36 | BC017562             | Hs.241336      | CDX2           | caudal type homeo box transcription factor 2                                                                                               |
| 1.65 | 1.17  | 0.49 | BC004242             | Hs.155218      | MVK            | mevalonate kinase (mevalonic aciduria)                                                                                                     |
| 1.65 | -0.05 | 1.69 | BC000614             | Hs.446552      | TUBB2          | tubulin, beta, 2                                                                                                                           |
| 1.65 | 0.15  | 1.49 | BC001642             | Hs.89605       | STOML2         | stomatin (EPB72)-like 2                                                                                                                    |
| 1.65 | 0.53  | 1.12 | BC005371             | Hs.7036        | KIAA1191       | KIAA1191 protein                                                                                                                           |
| 1.64 | 0.89  | 0.76 | BC013188             | Hs.421194      | TM4SF1         | transmembrane 4 superfamily member 1                                                                                                       |
| 1.64 | -0.20 | 1.84 | BC000144             | Hs.184270      | CAPZA1         | capping protein (actin filament) muscle Z-line, alpha 1                                                                                    |
| 1.64 | 0.36  | 1.28 | BC012550             | Hs.74082       | KLRC1          | killer cell lectin-like receptor subfamily C, member 1                                                                                     |
| 1.63 | 1.35  | 0.28 | BC009319             | Hs.250624      | DKFZP564M182   | DKFZP564M182 protein                                                                                                                       |
| 1.63 | 1.50  | 0.13 | BC002803             | Hs.11156       | KIAA0020       | minor histocompatibility antigen HA-8                                                                                                      |
| 1.63 | -0.09 | 1.73 | BC004819             | Hs.317714      | PLDN           | pallidin homolog (mouse)                                                                                                                   |
| 1.63 | -1.03 | 2.66 | BC006804             | Hs.154718      | TPD52L2        | tumor protein D52-like 2                                                                                                                   |
| 1.63 | -1.69 | 3.32 | BC010958             | Hs.75586       | CCND2          | cyclin D2                                                                                                                                  |
| 1.63 | 0.17  | 1.45 | BC008846             | Data not found | ELA3B          | elastase 3B, pancreatic                                                                                                                    |
| 1.62 | 0.18  | 1.44 | BC004881             | Hs.25524       | SMA3           | SMA3                                                                                                                                       |
| 1.62 | 0.25  | 1.37 | BC005366             | Hs.81634       | ARHF           | ras homolog gene family, member F (in filopodia)                                                                                           |
| 1.62 | 0.80  | 0.82 | BC000623             | Hs.311100      | MGC2718        | hypothetical protein MGC2718                                                                                                               |
| 1.62 | 0.53  | 1.08 | Data not found       |                | PSMD11         | proteasome (prosome, macropain) 26S subunit, non-ATPase, 11                                                                                |
| 1.61 | -0.05 | 1.66 | BC007011             | Hs.97411       | SLAHBP1        | fuse-binding protein-interacting repressor                                                                                                 |
| 1.61 | 0.50  | 1.11 | BC010652             | Hs.91668       | MAGEA3         | melanoma antigen, family A, 3                                                                                                              |
| 1.60 | -1.01 | 2.60 | BC000416             | Hs.150922      | SPHK2          | sphingosine kinase 2                                                                                                                       |
| 1.60 | 0.91  | 0.69 | BC008439             | Hs.430150      | USP10          | ubiquitin specific protease 10                                                                                                             |
| 1.59 | 0.48  | 1.10 | BC000744             | Hs.84285       | UBE2I          | ubiquitin-conjugating enzyme E2I (UBC9 homolog, yeast)                                                                                     |
| 1.58 | 1.16  | 0.43 | BC012354             | Hs.356360      | NA 4-14-03 2   |                                                                                                                                            |
| 1.58 | 0.23  | 1.36 | BC007374             | Hs.48650       | LOC142937      | hypothetical protein BC008131                                                                                                              |
| 1.58 | -0.74 | 2.33 | BC005231             | Data not found | BPGM           | 2,3-bisphosphoglycerate mutase                                                                                                             |
| 1.58 | 0.96  | 0.62 | BC009790             | Hs.1815        | MYL3           | myosin, light polypeptide 3, alkali; ventricular, skeletal, slow                                                                           |
| 1.58 | 0.49  | 1.09 | BC014061             | Hs.169138      | DKFZP434H132   | DKFZP434H132 protein                                                                                                                       |
| 1.58 | 0.68  | 0.89 | BC010377             | Hs.50984       | SAS            | sarcoma amplified sequence                                                                                                                 |
| 1.57 | 0.03  | 1.54 | BC000744             | Hs.84285       | UBE2I          | ubiquitin-conjugating enzyme E2I (UBC9 homolog, yeast)                                                                                     |
| 1.56 | 1.03  | 0.53 | BC014217             | Hs.8054        | CHEK1          | CHK1 checkpoint homolog (S. pombe)                                                                                                         |
| 1.56 | 0.72  | 0.84 | In multiple clusters |                | MGC20481       | hypothetical protein MGC20481                                                                                                              |
| 1.56 | 1.30  | 0.26 | BC000390             | Hs.203910      | GDI1           | GDP dissociation inhibitor 1                                                                                                               |
| 1.56 | -0.29 | 1.85 | BC008251             | Hs.182476      | RABIF          | RAB interacting factor                                                                                                                     |
| 1.56 | 1.14  | 0.42 | BC001821             | Hs.323949      | KAI1           | kangai 1 (suppression of tumorigenicity 6, prostate; CD82 antigen (R2 leukocyte antigen, antigen detected by monoclonal and antibody IA4)) |
| 1.55 | 1.09  | 0.46 | BC011583             | Hs.159406      | EIF3S2         | eukaryotic translation initiation factor 3, subunit 2 beta, 36kDa                                                                          |
| 1.54 | 0.98  | 0.56 | Data not found       |                | dJ383J4.3      | hypothetical gene supported by BC007071                                                                                                    |
| 1.54 | 0.57  | 0.97 | BC003637             | Hs.400353      | NA 4-14-03 500 |                                                                                                                                            |
| 1.54 | -0.22 | 1.76 | BC006559             | Hs.356360      | CHEK2          | CHK2 checkpoint homolog (S. pombe)                                                                                                         |
| 1.54 | 0.02  | 1.51 | BC002944             | Hs.424099      | MAGEA8         | melanoma antigen, family A, 8                                                                                                              |
| 1.54 | 0.11  | 1.43 | BC000747             | Hs.211973      | RRP4           | homolog of Yeast RRP4 (ribosomal RNA processing 4), 3'-5'-exoribonuclease                                                                  |
| 1.53 | 0.34  | 1.20 | BC021198             | Hs.75244       | CGI-128        | CGI-128 protein                                                                                                                            |
| 1.53 | 0.41  | 1.12 | BC004964             | Hs.168669      | CALU           | calumenin                                                                                                                                  |
| 1.53 | 0.67  | 0.86 | BC005214             | Hs.79381       | SLC12A8        | solute carrier family 12 (potassium/chloride transporters), member 8                                                                       |
| 1.53 | -0.70 | 2.23 | BC015177             | Data not found | STOML2         | stomatin (EPB72)-like 2                                                                                                                    |
| 1.53 | -0.40 | 1.93 | BC010621             | Hs.158084      | NA 4-14-03 1   |                                                                                                                                            |
| 1.53 | 0.22  | 1.31 | BC007516             | Hs.326422      | MGC4549        | hypothetical protein MGC4549                                                                                                               |
| 1.52 | 0.89  | 0.63 | BC002396             | Hs.284279      | WBP2           | WW domain binding protein 2                                                                                                                |

|      |       |      |          |                |                 |                                                                                                                    |
|------|-------|------|----------|----------------|-----------------|--------------------------------------------------------------------------------------------------------------------|
| 1.52 | 0.63  | 0.88 | BC001348 | Hs.245710      | FLJ11305        | hypothetical protein FLJ11305                                                                                      |
| 1.52 | 0.48  | 1.03 | BC011885 | Hs.332404      | TPM3            |                                                                                                                    |
| 1.51 | 0.82  | 0.69 | BC015920 | Hs.71642       | KCNS3           | potassium voltage-gated channel, delayed-rectifier, subfamily S, member 3                                          |
| 1.51 | -0.05 | 1.56 | BC000993 | Hs.334319      | LOC130026       | hypothetical protein BC000993                                                                                      |
| 1.51 | -1.48 | 2.99 | BC007035 | Hs.84928       | UPK1B           | uroplakin 1B                                                                                                       |
| 1.51 | 1.27  | 0.24 | BC011350 | Hs.48938       | NUP88           | nucleoporin 88kDa                                                                                                  |
| 1.50 | 1.32  | 0.19 | BC006439 | Hs.284180      | VMP1            | likely ortholog of rat vacuole membrane protein 1                                                                  |
| 1.50 | 0.55  | 0.96 | BC008858 | Hs.283976      | CCBL1           | cysteine conjugate-beta lyase; cytoplasmic (glutamine transaminase K, kyneurenine aminotransferase)                |
| 1.50 | -0.22 | 1.72 | BC002890 | Hs.184519      | MRS2L           | MRS2-like, magnesium homeostasis factor ( <i>S. cerevisiae</i> )                                                   |
| 1.50 | 0.84  | 0.66 | BC000748 | Hs.159154      | TUBB4           | tubulin, beta, 4                                                                                                   |
| 1.49 | 0.57  | 0.92 | BC000051 | Hs.182859      | HSPC152         | hypothetical protein HSPC152                                                                                       |
| 1.49 | 1.26  | 0.22 | BC008644 | Data not found | SEDL            |                                                                                                                    |
| 1.49 | -0.19 | 1.68 | BC007295 | Hs.407372      | ANXA2           | annexin A2                                                                                                         |
| 1.49 | 0.44  | 1.05 | BC017555 | Hs.72879       | C(27)-3BETA-HSD | hydroxy-delta-5-steroid dehydrogenase, 3 beta- and steroid delta-isomerase 7                                       |
| 1.49 | 0.67  | 0.82 | BC001514 | Hs.155584      | ICAM4           | intercellular adhesion molecule 4, Landsteiner-Wiener blood group                                                  |
| 1.49 | 0.62  | 0.86 | BC012139 | Hs.29696       | RPS25           | ribosomal protein S25                                                                                              |
| 1.48 | -0.23 | 1.72 | BC014107 | Hs.27262       | MGC4266         | hypothetical protein MGC4266                                                                                       |
| 1.48 | -1.52 | 3.00 | BC007827 | Hs.334526      |                 |                                                                                                                    |
| 1.48 | 1.04  | 0.43 | BC008712 | Hs.206501      | NAG73           | NPC-related protein NAG73                                                                                          |
| 1.47 | 0.26  | 1.22 | BC005248 | Hs.155103      | CFL1            | cofilin 1 (non-muscle)                                                                                             |
| 1.47 | 1.07  | 0.40 | BC011556 | Hs.65412       | NUDC            | nuclear distribution gene C homolog ( <i>A. nidulans</i> )                                                         |
| 1.47 | 1.40  | 0.07 | BC007863 | Hs.6793        |                 |                                                                                                                    |
| 1.47 | 0.95  | 0.51 | BC014029 | Hs.155287      | U2AF1           | U2(RNU2) small nuclear RNA auxillary factor 1                                                                      |
| 1.46 | 0.23  | 1.23 | BC006133 | Hs.65238       | EPHX2           | epoxide hydrolase 2, cytoplasmic                                                                                   |
| 1.46 | 0.89  | 0.57 | BC008420 | Hs.85119       | TUBD1           | likely ortholog of mouse tubulin, delta 1                                                                          |
| 1.46 | 1.26  | 0.20 | BC006784 | Hs.431584      | RPS14           | ribosomal protein S14                                                                                              |
| 1.46 | 0.65  | 0.81 | BC001131 | Hs.352109      | H2BFA           | histone 1, H2bg                                                                                                    |
| 1.45 | -0.57 | 2.01 | BC005023 | Hs.9825        | BCL2L2          | BCL2-like 2                                                                                                        |
| 1.44 | 0.61  | 0.82 | BC000901 | Hs.119475      | CIRBP           | cold inducible RNA binding protein                                                                                 |
| 1.44 | 0.20  | 1.24 | BC008678 | Hs.126256      | C21orf97        | chromosome 21 open reading frame 97                                                                                |
| 1.43 | 0.26  | 1.18 | BC007212 | Hs.99256       | NPM1            | nucleophosmin (nucleolar phosphoprotein B23, numatrin)                                                             |
| 1.43 | 1.22  | 0.21 | BC001674 | Hs.27556       | FLJ22405        | hypothetical protein FLJ22405                                                                                      |
| 1.43 | -0.63 | 2.06 | BC016979 | Hs.140950      | COX7A2L         | cytochrome c oxidase subunit VIIa polypeptide 2 like                                                               |
| 1.43 | -0.52 | 1.95 | BC012469 | Data not found | BSG             | basigin (OK blood group)                                                                                           |
| 1.43 | 0.36  | 1.07 | BC008876 | Hs.1408        | RTN3            | reticulon 3                                                                                                        |
| 1.43 | 0.57  | 0.86 | BC007680 | Hs.278507      | HARSL           | histidyl-tRNA synthetase-like                                                                                      |
| 1.43 | 0.92  | 0.51 | BC013376 | Hs.326733      | C1orf8          | chromosome 1 open reading frame 8                                                                                  |
| 1.43 | -0.05 | 1.48 | BC012131 | Hs.29706       | LAPTM4A         | lysosomal-associated protein transmembrane 4 alpha                                                                 |
| 1.43 | 1.27  | 0.16 | BC012357 | Hs.53447       | NDRG1           | N-myc downstream regulated gene 1                                                                                  |
| 1.43 | 0.25  | 1.18 | BC006254 | Hs.48348       | MANBAL          | mannosidase, beta A, lysosomal-like                                                                                |
| 1.42 | 0.21  | 1.21 | BC001259 | Hs.50628       | AP4S1           | adaptor-related protein complex 4, sigma 1 subunit                                                                 |
| 1.42 | 0.81  | 0.61 | BC021988 | Hs.30340       | DPP3            | dipeptidylpeptidase 3                                                                                              |
| 1.42 | 1.18  | 0.24 | BC003555 | Hs.134200      | RPL9            | ribosomal protein L9                                                                                               |
| 1.42 | 0.76  | 0.66 | BC013953 | Hs.424931      | TPM3            |                                                                                                                    |
| 1.41 | 1.09  | 0.32 | BC015961 | Hs.394         | SATB1           | special AT-rich sequence binding protein 1 (binds to nuclear matrix/scaffold-associating DNA's)                    |
| 1.41 | 0.35  | 1.07 | BC000391 | Hs.66196       | CASP2           | caspase 2, apoptosis-related cysteine protease (neural precursor cell expressed, developmentally down-regulated 2) |
| 1.41 | 0.70  | 0.71 | BC004987 | Hs.47584       | GNB3            | guanine nucleotide binding protein (G protein), beta polypeptide 3                                                 |
| 1.41 | 0.53  | 0.88 | BC003362 | Hs.9030        | TONDU           | TONDU                                                                                                              |
| 1.41 | -0.61 | 2.02 | BC009869 | Hs.380718      | LOC91056        | hypothetical protein BC004895                                                                                      |
| 1.41 | 1.36  | 0.05 | BC014128 | Hs.334684      |                 |                                                                                                                    |
| 1.41 | 0.28  | 1.13 | BC017469 | Hs.71040       | NA 4-14-03 110  |                                                                                                                    |

|      |       |      |           |                |                |                                                                           |
|------|-------|------|-----------|----------------|----------------|---------------------------------------------------------------------------|
| 1.41 | 1.09  | 0.31 | BC004162  | Hs.275711      | MGC2452        | hypothetical protein MGC2452                                              |
| 1.40 | 1.13  | 0.27 | BC008438  | Hs.109276      | PTP4A3         | protein tyrosine phosphatase type IVA, member 3                           |
| 1.40 | -1.66 | 3.06 | BC017219  | Hs.288995      | FLJ20813       | hypothetical protein FLJ20813                                             |
| 1.40 | 0.25  | 1.15 | BC007095  | Hs.30888       | MGC3234        | hypothetical protein MGC3234                                              |
| 1.39 | 1.08  | 0.31 | BC010080  | Hs.296242      | CENTB1         | centaurin, beta 1                                                         |
| 1.39 | 0.18  | 1.21 | BC012912  | Hs.82208       | MYCBP          | c-myc binding protein                                                     |
| 1.39 | 1.38  | 0.01 | BC012063  | Hs.26550       | NA 4-14-03 297 |                                                                           |
| 1.39 | -0.92 | 2.31 | BC007917  | Hs.334527      | NA 4-14-03 106 |                                                                           |
| 1.39 | -0.05 | 1.44 | BC002812  | Hs.154510      | KIAA1376       | KIAA1376 protein                                                          |
| 1.38 | 0.17  | 1.22 | BC014555  | Hs.334         |                | Homo sapiens, clone IMAGE:4850403, mRNA                                   |
| 1.38 | 0.24  | 1.14 | BC014948  | Hs.297405      | CYR61          | cysteine-rich, angiogenic inducer, 61                                     |
| 1.38 | 0.09  | 1.29 | BC009881  | Hs.178617      | STOML2         | stomatin (EPB72)-like 2                                                   |
| 1.38 | 0.17  | 1.21 | BC008306  | Hs.355906      | PBP            | prostatic binding protein                                                 |
| 1.38 | 0.69  | 0.69 | BC007402  | Hs.75736       | MGC3113        | hypothetical protein MGC3113                                              |
| 1.38 | -0.30 | 1.68 | BC001651  | Hs.48855       | FLJ10468       | hypothetical protein FLJ10468                                             |
| 1.38 | 1.29  | 0.08 | BC008975  | Hs.7049        | HSPC052        | HSPC052 protein                                                           |
| 1.37 | 0.90  | 0.48 | BC009976  | Hs.192285      | MGC29762       | hypothetical protein MGC29762                                             |
| 1.37 | 0.80  | 0.57 | BC018652  | Hs.3807        | SAS            | N-acetylneuraminic acid synthase (sialic acid synthase)                   |
| 1.37 | 0.92  | 0.45 | BC000043  | Hs.183153      | LOC56181       | hypothetical protein RP1-317E23                                           |
| 1.37 | 0.95  | 0.42 | BC012178  | Hs.5398        | IFIT4          | interferon-induced protein with tetratricopeptide repeats 4               |
| 1.37 | -0.90 | 2.27 | BC012595  | Hs.23103       | BET1           | BET1 homolog (S. cerevisiae)                                              |
| 1.37 | 0.69  | 0.67 | BC013611  | Hs.380728      | RPS3A          | ribosomal protein S3A                                                     |
| 1.36 | -0.45 | 1.81 | NM_006029 | Hs.194709      | FLJ11198       | hypothetical protein FLJ11198                                             |
| 1.36 | 0.23  | 1.13 | BC004535  | Hs.76662       | LOC90141       | chromosome 14 open reading frame 143                                      |
| 1.36 | 0.00  | 1.36 | BC002420  | Hs.22412       | KIAA1160       | KIAA1160 protein                                                          |
| 1.35 | 0.73  | 0.62 | BC001659  | Hs.75104       | RNPS1          | RNA binding protein S1, serine-rich domain                                |
| 1.35 | 1.16  | 0.19 | BC000232  | Hs.178112      | PEN-2          | presenilin enhancer 2                                                     |
| 1.35 | 0.72  | 0.64 | BC008664  | Hs.2043        | LOC113174      | hypothetical protein BC012010                                             |
| 1.34 | -0.82 | 2.16 | BC010855  | Hs.75835       | LOC93408       | hypothetical protein BC002778                                             |
| 1.34 | 0.90  | 0.44 | BC017191  | Hs.265327      | EIF3S6IP       | eukaryotic translation initiation factor 3, subunit 6 interacting protein |
| 1.34 | 0.70  | 0.63 | BC006825  | Hs.301404      | RBM3           | RNA binding motif protein 3                                               |
| 1.33 | 0.36  | 0.98 | BC007610  | Hs.406423      | PDCD10         | programmed cell death 10                                                  |
| 1.33 | 0.35  | 0.98 | BC010660  | Hs.273415      | PHGDH          | phosphoglycerate dehydrogenase                                            |
| 1.33 | 0.29  | 1.04 | BC003604  | Hs.7579        | NFIC           | nuclear factor I/C (CCAAT-binding transcription factor)                   |
| 1.32 | 0.94  | 0.38 | BC011777  | Hs.184276      | PPM1F          | protein phosphatase 1F (PP2C domain containing)                           |
| 1.32 | 0.52  | 0.81 | BC011584  | Hs.10487       | LR8            | LR8 protein                                                               |
| 1.32 | 0.76  | 0.56 | BC014058  | Hs.13094       | CD84           | CD84 antigen (leukocyte antigen)                                          |
| 1.32 | 0.30  | 1.02 | BC013630  | Hs.301613      | DKFZP761I2123  | hypothetical protein DKFZp761I2123                                        |
| 1.31 | -0.06 | 1.38 | BC004957  | Hs.54320       | HSPC031        | hypothetical protein HSPC031                                              |
| 1.31 | 1.28  | 0.02 | BC001285  | Hs.180433      | HSRTSBETA      | rTS beta protein                                                          |
| 1.30 | 0.59  | 0.72 | NM_032261 | Hs.381214      | UP             | uridine phosphorylase                                                     |
| 1.30 | 0.69  | 0.62 | BC016977  | Hs.294101      | KIAA1305       | KIAA1305 protein                                                          |
| 1.30 | -0.08 | 1.38 | BC012352  | Hs.133331      | NINJ1          | ninjurin 1                                                                |
| 1.30 | -1.39 | 2.70 | BC006155  | Hs.19121       | GM2A           | GM2 ganglioside activator protein                                         |
| 1.30 | -0.28 | 1.58 | BC020998  | Hs.158244      | PPARA          | peroxisome proliferative activated receptor, alpha                        |
| 1.30 | 0.62  | 0.68 | BC002382  | Hs.226581      | DKFZP566K1924  | DKFZP566K1924 protein                                                     |
| 1.29 | -0.06 | 1.36 | BC010627  | Data not found | CIRBP          | cold inducible RNA binding protein                                        |
| 1.29 | 1.23  | 0.07 | BC009461  | Hs.231029      |                | Homo sapiens, clone IMAGE:4861097, mRNA                                   |
| 1.29 | -0.25 | 1.54 | BC001319  | Hs.347950      | PIGS           | phosphatidylinositol glycan, class S                                      |
| 1.29 | 1.00  | 0.29 | BC006253  | Hs.16390       | C20orf97       | chromosome 20 open reading frame 97                                       |
| 1.29 | -0.23 | 1.52 | BC003137  | Hs.414990      | DNAJA3         | DnaJ (Hsp40) homolog, subfamily A, member 3                               |
| 1.29 | 0.55  | 0.74 | BC002833  | Hs.87225       | ABCE1          | ATP-binding cassette, sub-family E (OABP), member 1                       |
| 1.28 | -0.58 | 1.86 | BC012950  | Hs.247323      | CKB            | creatine kinase, brain                                                    |

|      |       |      |           |                      |                |                                                                                 |
|------|-------|------|-----------|----------------------|----------------|---------------------------------------------------------------------------------|
| 1.28 | 0.50  | 0.78 | BC000147  | Hs.75342             | ME2            | malic enzyme 2, NAD(+)-dependent, mitochondrial                                 |
| 1.28 | 0.40  | 0.88 | BC000319  | Hs.15961             | TSPAN-3        | tetraspan 3                                                                     |
| 1.28 | 0.43  | 0.85 | BC005071  | Hs.332382            | STK12          | serine/threonine kinase 12                                                      |
| 1.28 | 0.51  | 0.77 | BC001052  | Hs.235069            | RECQL          | RecQ protein-like (DNA helicase Q1-like)                                        |
| 1.28 | 1.11  | 0.17 | BC004233  | Hs.27935             | SIAHBP1        | fuse-binding protein-interacting repressor                                      |
| 1.28 | -0.62 | 1.90 | NM_000371 | Hs.427202            | MGC13007       | hypothetical protein MGC13007                                                   |
| 1.27 | 0.21  | 1.07 | BC000732  | Hs.152707            | GBAS           | glioblastoma amplified sequence                                                 |
| 1.27 | 0.98  | 0.29 | BC021239  | Hs.153177            | PTAFR          | platelet-activating factor receptor                                             |
| 1.27 | 0.24  | 1.03 | BC005246  | Hs.84072             | STX7           | syntaxin 7                                                                      |
| 1.27 | -0.04 | 1.31 | BC013596  | Hs.406397            | G6PT1          | glucose-6-phosphatase, transport (glucose-6-phosphate) protein 1                |
| 1.27 | 1.16  | 0.11 | BC005080  | Hs.76095             | SF3B4          | splicing factor 3b, subunit 4, 49kDa                                            |
| 1.27 | -0.54 | 1.81 | BC002553  | Hs.83155             | ALDH3B1        | aldehyde dehydrogenase 3 family, member B1                                      |
| 1.27 | 1.12  | 0.15 | BC000155  | Hs.268530            | GPS1           | G protein pathway suppressor 1                                                  |
| 1.27 | 1.14  | 0.12 | BC001823  | Hs.6061              | PDAP1          | PDGFA associated protein 1                                                      |
| 1.27 | 0.13  | 1.14 | BC003394  | Hs.418901            | HNRPC          | heterogeneous nuclear ribonucleoprotein C (C1/C2)                               |
| 1.27 | -0.30 | 1.57 | BC003629  | Data not found       | RNU2           |                                                                                 |
| 1.27 | 0.46  | 0.81 | BC007195  | Hs.101695            | NCK2           | NCK adaptor protein 2                                                           |
| 1.27 | -0.96 | 2.22 | BC001047  | Hs.446459            | DBR1           | debranching enzyme homolog 1 (S. cerevisiae)                                    |
| 1.26 | 1.03  | 0.24 | BC012809  | Hs.5198              | DSCR2          | Down syndrome critical region gene 2                                            |
| 1.26 | 0.21  | 1.05 | BC007063  | Hs.180909            | My015          | chromosome 14 open reading frame 52                                             |
| 1.26 | 1.02  | 0.24 | BC011936  | In multiple clusters | CLN2           | ceroid-lipofuscinosis, neuronal 2, late infantile (Jansky-Bielschowsky disease) |
| 1.26 | 0.70  | 0.56 | BC004523  | Hs.13225             | NA 4-14-03 501 |                                                                                 |
| 1.26 | -0.05 | 1.31 | BC009331  | Hs.337772            | HSPC049        | HSPC049 protein                                                                 |
| 1.25 | -0.02 | 1.28 | BC015601  | Hs.73722             | ALS2CR2        | amyotrophic lateral sclerosis 2 (juvenile) chromosome region, candidate 2       |
| 1.25 | 0.27  | 0.98 | BC021979  | Hs.99858             | MSN            | moesin                                                                          |
| 1.25 | 0.51  | 0.75 | BC012113  | Hs.424053            | TP53           | tumor protein p53 (Li-Fraumeni syndrome)                                        |
| 1.25 | 0.64  | 0.61 | BC011942  | Data not found       | B4GALT4        | UDP-Gal:betaGlcNAc beta 1,4- galactosyltransferase, polypeptide 4               |
| 1.25 | -0.40 | 1.65 | BC009825  | Hs.101821            | MYOZ2          | myozenin 2                                                                      |
| 1.25 | 0.42  | 0.83 | BC003360  | Hs.100555            | DDX18          | DEAD/H (Asp-Glu-Ala-Asp/His) box polypeptide 18 (Myc-regulated)                 |
| 1.25 | 0.21  | 1.04 | BC002730  | Hs.17144             | SPIN           | spindlin                                                                        |
| 1.25 | 0.63  | 0.62 | BC001952  | Hs.7845              | MGC2752        | hypothetical protein MGC2752                                                    |
| 1.24 | -0.18 | 1.42 | BC005118  | Hs.150580            | PCBP3          | poly(rC) binding protein 3                                                      |
| 1.24 | -0.39 | 1.63 | BC012049  | Hs.154654            | FAF1           | Fas (TNFRSF6) associated factor 1                                               |
| 1.24 | 0.87  | 0.37 | BC007320  | Hs.188401            | MGC2603        | hypothetical protein MGC2603                                                    |
| 1.24 | -0.10 | 1.34 | BC001037  | Hs.288544            | MGC10977       | tripartite motif-containing 51                                                  |
| 1.24 | 1.09  | 0.15 | BC011349  | Hs.1544              | MIF            | macrophage migration inhibitory factor (glycosylation-inhibiting factor)        |
| 1.24 | 0.57  | 0.67 | BC012167  | Hs.284286            | FLJ10569       | hypothetical protein FLJ10569                                                   |
| 1.24 | 0.71  | 0.53 | BC007560  | Hs.334851            | SRP9           | signal recognition particle 9kDa                                                |
| 1.24 | 0.26  | 0.98 | BC000084  | Hs.22451             | FLJ20399       | hypothetical protein FLJ20399                                                   |
| 1.24 | 0.15  | 1.09 | BC002805  | Hs.333303            | COG8           | component of oligomeric golgi complex 8                                         |
| 1.24 | 0.96  | 0.28 | BC000453  | Hs.75737             | FLJ14775       | hypothetical protein FLJ14775                                                   |
| 1.24 | 0.43  | 0.81 | BC005073  | Hs.332040            | LOC55971       | insulin receptor tyrosine kinase substrate                                      |
| 1.24 | -0.35 | 1.59 | BC008877  | Hs.271815            | FLJ12975       | hypothetical protein FLJ12975                                                   |
| 1.23 | 0.81  | 0.42 | BC012120  | Hs.433504            | FLJ10402       | importin 9                                                                      |
| 1.23 | 0.21  | 1.02 | BC001383  | Hs.181874            | IFIT4          | interferon-induced protein with tetratricopeptide repeats 4                     |
| 1.23 | 0.28  | 0.95 | BC002914  | Hs.379203            | RRP40          | exosome component Rrp40                                                         |
| 1.22 | 1.02  | 0.21 | BC009846  | Hs.3618              | LAMP1          | lysosomal-associated membrane protein 1                                         |
| 1.22 | -0.82 | 2.04 | BC007242  | Hs.77711             | LOC116254      | hypothetical protein BC014320                                                   |
| 1.22 | -0.36 | 1.58 | BC015725  | Hs.172702            | MUF1           | MUF1 protein                                                                    |
| 1.22 | -0.84 | 2.07 | BC006553  | Hs.70704             | LOC54499       | putative membrane protein                                                       |
| 1.22 | -1.03 | 2.25 | BC006098  | Hs.421667            | ETF1           | eukaryotic translation termination factor 1                                     |
| 1.22 | -0.27 | 1.49 | BC011839  | Hs.334               | LSP1           | lymphocyte-specific protein 1                                                   |
| 1.22 | 0.64  | 0.58 | BC010903  | Hs.14347             | FLJ10460       | hypothetical protein FLJ10460                                                   |

|      |       |      |                |                |                |                                                                                               |
|------|-------|------|----------------|----------------|----------------|-----------------------------------------------------------------------------------------------|
| 1.22 | -2.89 | 4.11 | BC006515       | Hs.159406      | COX6B          | cytochrome c oxidase subunit VIb                                                              |
| 1.22 | -1.15 | 2.37 | BC005004       | Hs.86211       | HTATSF1        | HIV TAT specific factor 1                                                                     |
| 1.22 | 0.13  | 1.09 | BC015617       | Hs.13526       | HMGN2          | high-mobility group nucleosomal binding domain 2                                              |
| 1.22 | -0.27 | 1.49 | BC006535       | Hs.86859       | MRP63          | mitochondrial ribosomal protein 63                                                            |
| 1.21 | 0.19  | 1.02 | BC000077       | Hs.178551      | SCMH1          | sex comb on midleg homolog 1 (Drosophila)                                                     |
| 1.21 | 0.08  | 1.13 | BC015934       | Hs.75207       | CGI-135        | CGI-135 protein                                                                               |
| 1.21 | 0.65  | 0.56 | BC005963       | Hs.417816      | H2AFL          | histone 1, H2ac                                                                               |
| 1.21 | 0.02  | 1.19 | BC010947       | Hs.2943        | SRP19          | signal recognition particle 19kDa                                                             |
| 1.21 | -0.71 | 1.92 | Data not found |                | MGC4809        | serologically defined breast cancer antigen NY-BR-20                                          |
| 1.21 | 0.71  | 0.50 | BC000910       | Hs.36587       | PPP1R7         | protein phosphatase 1, regulatory subunit 7                                                   |
| 1.21 | 0.06  | 1.15 | BC003400       | Hs.60679       | TAF9           | TAF9 RNA polymerase II, TATA box binding protein (TBP)-associated factor, 32kDa               |
| 1.21 | 0.25  | 0.96 | BC000669       | Hs.433337      | HM13           | histocompatibility (minor) 13                                                                 |
| 1.21 | -0.70 | 1.91 | BC001282       | Hs.236774      | HMGN4          | high mobility group nucleosomal binding domain 4                                              |
| 1.21 | -0.02 | 1.23 | BC016763       | Hs.278255      | C20orf100      | chromosome 20 open reading frame 100                                                          |
| 1.20 | -0.49 | 1.70 | BC013999       | Hs.158006      | NA 4-14-03 252 |                                                                                               |
| 1.20 | -0.70 | 1.90 | BC010550       | Hs.3132        | LOC51219       | clone FLB5214                                                                                 |
| 1.20 | 0.40  | 0.80 | BC005289       | Hs.42644       | SNX12          | sorting nexin 12                                                                              |
| 1.20 | 0.62  | 0.58 | BC003533       | Hs.73452       | NA 4-14-03 216 |                                                                                               |
| 1.20 | 0.14  | 1.06 | BC005156       | Hs.38044       | FLJ23277       | FLJ23277 protein                                                                              |
| 1.20 | 0.56  | 0.64 | BC002771       | Hs.13880       | AKR7A2         | aldo-keto reductase family 7, member A2 (aflatoxin aldehyde reductase)                        |
| 1.20 | -0.24 | 1.44 | BC008914       | Hs.407995      | TOLLIP         | Toll-interacting protein                                                                      |
| 1.20 | 0.31  | 0.89 | BC002842       | Hs.180779      | KIAA0252       | KIAA0252 protein                                                                              |
| 1.20 | 0.32  | 0.87 | BC000154       | Hs.119178      | CIP1           | cation-chloride cotransporter-interacting protein                                             |
| 1.19 | 0.46  | 0.73 | BC011714       | Hs.372673      | SLC23A1        | solute carrier family 23 (nucleobase transporters), member 1                                  |
| 1.18 | 0.53  | 0.65 | BC022191       | Hs.166019      | DFFA           | DNA fragmentation factor, 45kDa, alpha polypeptide                                            |
| 1.18 | 0.33  | 0.85 | BC007951       | Hs.2316        | CALM2          | calmodulin 2 (phosphorylase kinase, delta)                                                    |
| 1.18 | 0.98  | 0.20 | BC000116       | Hs.75824       | KDELR2         | KDEL (Lys-Asp-Glu-Leu) endoplasmic reticulum protein retention receptor 2                     |
| 1.18 | 0.26  | 0.92 | BC013748       | Hs.279529      | DKFZP564K1964  | DKFZP564K1964 protein                                                                         |
| 1.18 | 0.28  | 0.90 | BC010035       | Hs.3712        | TFPI           | tissue factor pathway inhibitor (lipoprotein-associated coagulation inhibitor)                |
| 1.18 | -0.19 | 1.37 | BC017068       | Hs.105956      | QPRT           | quinolate phosphoribosyltransferase (nicotinate-nucleotide pyrophosphorylase (carboxylating)) |
| 1.17 | 0.25  | 0.92 | BC008628       | Hs.5710        | LOC200383      | similar to Dynein heavy chain at 16F                                                          |
| 1.17 | 0.59  | 0.58 | BC005830       | Hs.279928      | RNH            | ribonuclease/angiogenin inhibitor                                                             |
| 1.16 | 0.62  | 0.54 | BC015022       | Hs.84038       | KIAA0111       | KIAA0111 gene product                                                                         |
| 1.16 | 0.51  | 0.66 | BC010540       | Data not found | FLJ23277       | FLJ23277 protein                                                                              |
| 1.16 | -0.39 | 1.55 | BC001129       | Hs.323634      | MGC2463        | hypothetical protein MGC2463                                                                  |
| 1.16 | 0.36  | 0.80 | BC016707       | Hs.10729       | SUI1           | putative translation initiation factor                                                        |
| 1.16 | 0.23  | 0.93 | BC002357       | Hs.100016      | CNOT3          | CCR4-NOT transcription complex, subunit 3                                                     |
| 1.16 | 1.14  | 0.02 | BC009291       | Hs.90998       | PPN            | likely ortholog of mouse porcupine homolog (Drosophila)                                       |
| 1.16 | -0.75 | 1.91 | BC000511       | Hs.377973      | PTD012         | PTD012 protein                                                                                |
| 1.16 | -1.37 | 2.53 | BC011011       | Hs.337778      | UEV3           | ubiquitin-conjugating enzyme E2-like                                                          |
| 1.15 | 0.61  | 0.54 | BC011922       | Hs.90998       | MGC2663        | hypothetical protein MGC2663                                                                  |
| 1.15 | -0.69 | 1.84 | BC007967       | Hs.426460      | LDHB           | lactate dehydrogenase B                                                                       |
| 1.15 | -0.05 | 1.20 | BC012621       | Hs.146322      | KLRG1          | killer cell lectin-like receptor subfamily G, member 1                                        |
| 1.15 | 0.05  | 1.10 | BC013885       | Hs.26395       | FLJ10989       | hypothetical protein FLJ10989                                                                 |
| 1.15 | 0.92  | 0.23 | BC013775       | Hs.26954       | GNB2L1         | guanine nucleotide binding protein (G protein), beta polypeptide 2-like 1                     |
| 1.15 | -0.52 | 1.67 | BC000382       | Hs.75117       | SERPINB1       | serine (or cysteine) proteinase inhibitor, clade B (ovalbumin), member 1                      |
| 1.15 | 1.12  | 0.02 | BC012857       | Hs.31130       | C21orf33       | chromosome 21 open reading frame 33                                                           |
| 1.14 | 0.75  | 0.39 | BC014071       | Hs.70500       | NAPG           | N-ethylmaleimide-sensitive factor attachment protein, gamma                                   |
| 1.14 | 0.78  | 0.37 | BC015790       | Hs.164464      | HSPCB          | heat shock 90kDa protein 1, beta                                                              |
| 1.14 | 0.66  | 0.48 | BC009821       | Hs.375217      | MLCB           | myosin, light polypeptide, regulatory, non-sarcomeric (20kD)                                  |
| 1.14 | 0.83  | 0.31 | BC010084       | Hs.44592       | DKFZP586M1523  | DKFZP586M1523 protein                                                                         |
| 1.14 | 1.09  | 0.05 | BC000799       | Hs.151536      | RAB13          | RAB13, member RAS oncogene family                                                             |
| 1.14 | 0.80  | 0.34 | BC020498       | Data not found | TALDO1         | transaldolase 1                                                                               |

|      |       |      |          |                |                |                                                                                             |
|------|-------|------|----------|----------------|----------------|---------------------------------------------------------------------------------------------|
| 1.13 | -0.31 | 1.44 | BC000170 | Hs.173611      | NDUFS2         | NADH dehydrogenase (ubiquinone) Fe-S protein 2, 49kDa (NADH-coenzyme Q reductase)           |
| 1.13 | 0.31  | 0.83 | BC002732 | Hs.347349      | APBB1          | amyloid beta (A4) precursor protein-binding, family B, member 1 (Fe65)                      |
| 1.13 | -0.37 | 1.50 | BC012133 | Hs.109281      | BZW2           | basic leucine zipper and W2 domains 2                                                       |
| 1.13 | -0.61 | 1.74 | BC004136 | Hs.9329        | PLAT           | plasminogen activator, tissue                                                               |
| 1.13 | -0.57 | 1.70 | BC005279 | Hs.2879        | HSPB1          | heat shock 27kDa protein 1                                                                  |
| 1.13 | -0.01 | 1.14 | BC000341 | Hs.74564       | VPS33A         | vacuolar protein sorting 33A (yeast)                                                        |
| 1.12 | 0.45  | 0.67 | BC005072 | Hs.326732      | ZNF43          | zinc finger protein 43 (HTF6)                                                               |
| 1.12 | -0.09 | 1.21 | BC006121 | Hs.117062      | DKFZP586M1019  | DKFZP586M1019 protein                                                                       |
| 1.12 | 0.41  | 0.72 | BC010423 | Hs.61460       | PCTK1          | PCTAIRE protein kinase 1                                                                    |
| 1.12 | -0.14 | 1.26 | BC017400 | Hs.273387      | BIRC5          | baculoviral IAP repeat-containing 5 (survivin)                                              |
| 1.12 | 0.87  | 0.25 | BC000671 | Hs.5372        | PSMD9          | proteasome (prosome, macropain) 26S subunit, non-ATPase, 9                                  |
| 1.12 | 0.70  | 0.42 | BC009548 | Hs.16269       | TUBB2          | tubulin, beta, 2                                                                            |
| 1.12 | 0.84  | 0.29 | BC009353 | Hs.737         | MAGEH1         | APR-1 protein                                                                               |
| 1.12 | 0.11  | 1.01 | BC009868 | Hs.1608        | SCMH1          | sex comb on midleg homolog 1 (Drosophila)                                                   |
| 1.12 | 0.11  | 0.01 | BC011904 | Hs.130558      | LOC91661       | hypothetical protein BC001610                                                               |
| 1.12 | -0.84 | 1.96 | BC009418 | Hs.283725      | LETM1          | leucine zipper-EF-hand containing transmembrane protein 1                                   |
| 1.11 | -0.37 | 1.49 | BC005069 | Hs.61268       | ARHGDI         | Rho GDP dissociation inhibitor (GDI) alpha                                                  |
| 1.11 | -0.41 | 1.53 | BC000683 | Hs.10784       | SH3GLB1        | SH3-domain GRB2-like endophilin B1                                                          |
| 1.11 | -0.92 | 2.03 | BC011379 | Hs.17936       | FSCN1          | fascin homolog 1, actin-bundling protein (Strongylocentrotus purpuratus)                    |
| 1.11 | 0.65  | 0.46 | BC012170 | Data not found | DKFZP564C103   | DKFZP564C103 protein                                                                        |
| 1.11 | 0.88  | 0.23 | BC003083 | Hs.177596      | THEA           | thioesterase, adipose associated                                                            |
| 1.10 | -0.36 | 1.46 | BC002640 | Data not found | LOC55974       | stromal cell protein                                                                        |
| 1.10 | 0.18  | 0.92 | BC009832 | Hs.234546      | NINJ2          | ninjurin 2                                                                                  |
| 1.10 | -0.30 | 1.40 | BC009386 | Hs.79410       | DOM3Z          | dom-3 homolog Z (C. elegans)                                                                |
| 1.10 | 0.76  | 0.34 | BC013414 | Hs.75090       | NA 4-14-03 345 |                                                                                             |
| 1.10 | 0.52  | 0.58 | BC018993 | Hs.356360      | FLJ20312       | hypothetical protein FLJ20312                                                               |
| 1.10 | 0.67  | 0.43 | BC011561 | Hs.31720       | VT11B          | vesicle transport through interaction with t-SNAREs homolog 1B (yeast)                      |
| 1.10 | -0.14 | 1.24 | BC000179 | Hs.79474       | YWHAE          | tyrosine 3-monooxygenase/tryptophan 5-monooxygenase activation protein, epsilon polypeptide |
| 1.10 | 0.78  | 0.31 | BC005307 | Hs.171995      | HTATIP2        | HIV-1 Tat interactive protein 2, 30kDa                                                      |
| 1.10 | 0.97  | 0.13 | BC014538 | Hs.161427      | ZNF215         | zinc finger protein 215                                                                     |
| 1.10 | 0.56  | 0.54 | BC001622 | Hs.30488       | MT1H           | metallothionein 1H                                                                          |
| 1.09 | 0.19  | 0.91 | BC012729 | Hs.288697      | DYT1           | dystonia 1, torsion (autosomal dominant; torsin A)                                          |
| 1.09 | -0.08 | 1.18 | BC009460 | Hs.351872      | MGC23244       | hypothetical protein MGC23244                                                               |
| 1.09 | -0.07 | 1.16 | BC003176 | Hs.273230      | FLJ10607       | glucosamine-phosphate N-acetyltransferase 1                                                 |
| 1.09 | -0.42 | 1.52 | BC009964 | Hs.7345        | DKFZP586D0919  | hepatocellularcarcinoma-associated antigen HCA557a                                          |
| 1.09 | -1.65 | 2.74 | BC012593 | Hs.275215      | HSD11B1        | hydroxysteroid (11-beta) dehydrogenase 1                                                    |
| 1.09 | 0.66  | 0.43 | BC006405 | Hs.74346       | RetSDR2        | retinal short-chain dehydrogenase/reductase 2                                               |
| 1.09 | 0.34  | 0.75 | BC008898 | Hs.56828       | TNRC5          | trinucleotide repeat containing 5                                                           |
| 1.08 | 0.37  | 0.71 | BC011701 | Hs.446459      | OAT            | ornithine aminotransferase (gyrate atrophy)                                                 |
| 1.08 | 0.77  | 0.31 | BC007765 | Hs.459         | NA 4-14-03 12  |                                                                                             |
| 1.08 | 1.02  | 0.06 | BC010703 | Hs.160483      | NONO           |                                                                                             |
| 1.08 | 0.59  | 0.49 | BC008789 | Hs.93574       | HOXD3          | homeo box D3                                                                                |
| 1.08 | 0.83  | 0.24 | BC019231 | Data not found | NA 4-14-03 375 |                                                                                             |
| 1.08 | 0.80  | 0.27 | BC014863 | Hs.20478       | EG1            |                                                                                             |
| 1.07 | 0.45  | 0.63 | BC005060 | Hs.8935        | SH3GLB2        | SH3-domain GRB2-like endophilin B2                                                          |
| 1.07 | 0.17  | 0.90 | BC012060 | Hs.120565      | MEL            | mel transforming oncogene (derived from cell line NK14)- RAB8 homolog                       |
| 1.07 | 0.96  | 0.11 | BC011772 | Hs.75648       | LOC116211      | hypothetical protein BC013113                                                               |
| 1.07 | -0.59 | 1.66 | BC018949 | Hs.77492       | VT11A          | vesicle transport through interaction with t-SNAREs homolog 1A (yeast)                      |
| 1.06 | 0.01  | 1.05 | BC008928 | Hs.4291        | CFL1           | cofilin 1 (non-muscle)                                                                      |
| 1.06 | 0.70  | 0.36 | BC004101 | Hs.193163      | FLJ10520       | hypothetical protein FLJ10520                                                               |
| 1.06 | -1.71 | 2.77 | BC014514 | Hs.213289      | POT1           | protection of telomeres 1                                                                   |
| 1.06 | -0.19 | 1.25 | BC007287 | Hs.115284      | LOC90736       | hypothetical protein BC000919                                                               |
| 1.06 | 0.77  | 0.29 | BC007835 | Hs.21396       | DKFZP564J157   | DKFZp564J157 protein                                                                        |

|      |       |      |          |                |                |                                                                                      |
|------|-------|------|----------|----------------|----------------|--------------------------------------------------------------------------------------|
| 1.06 | 1.03  | 0.02 | BC015936 | Hs.6856        | RPS25          | ribosomal protein S25                                                                |
| 1.06 | -1.63 | 2.69 | BC015179 | Hs.12102       | MED8           | mediator of RNA polymerase II transcription, subunit 8 homolog (yeast)               |
| 1.05 | -0.56 | 1.62 | BC006006 | Hs.333526      | GALK1          | galactokinase 1                                                                      |
| 1.05 | 0.57  | 0.48 | BC017716 | Hs.95655       | MGC20533       | similar to RIKEN cDNA 2410004L22 gene (M. musculus)                                  |
| 1.05 | 0.44  | 0.61 | BC003627 | Hs.80624       | MGC2560        | hypothetical protein MGC2560                                                         |
| 1.05 | -0.58 | 1.63 | BC000965 | Hs.97996       | MTERF          | transcription termination factor, mitochondrial                                      |
| 1.05 | 1.03  | 0.02 | BC019348 | Data not found | NA 4-14-03 435 |                                                                                      |
| 1.05 | 0.04  | 1.01 | BC002449 | Hs.24391       | CRMP5          | collapsin response mediator protein-5; CRMP3-associated molecule                     |
| 1.05 | 0.25  | 0.79 | BC005126 | Hs.284202      | BGN            | biglycan                                                                             |
| 1.04 | 0.82  | 0.22 | BC019096 | Hs.21811       | DGCR8          | DiGeorge syndrome critical region gene 8                                             |
| 1.04 | 0.54  | 0.50 | BC001748 | Hs.217493      | LOC112817      | hypothetical protein BC011916                                                        |
| 1.04 | -0.59 | 1.63 | BC004219 | Data not found | ALDH9A1        | aldehyde dehydrogenase 9 family, member A1                                           |
| 1.04 | 0.01  | 1.03 | BC000032 | Hs.8047        | HNOEL-iso      | HNOEL-iso protein                                                                    |
| 1.04 | -0.68 | 1.72 | BC022845 | Hs.6353        | MRG15          | mortality factor 4 like 1                                                            |
| 1.04 | 0.93  | 0.11 | BC013038 | Hs.108183      | NUDT3          | nudix (nucleoside diphosphate linked moiety X)-type motif 3                          |
| 1.04 | 0.65  | 0.39 | BC006544 | Hs.226396      | PX19           | px19-like protein                                                                    |
| 1.04 | 0.19  | 0.85 | BC004938 | Hs.184640      | KEAP1          | Kelch-like ECH-associated protein 1                                                  |
| 1.04 | -0.83 | 1.87 | BC011870 | Hs.116056      | ZNF271         | zinc finger protein 271                                                              |
| 1.04 | -0.16 | 1.20 | BC002630 | Hs.355722      | GPR87          | G protein-coupled receptor 87                                                        |
| 1.04 | -0.36 | 1.40 | BC002858 | Hs.178471      | KIAA0701       | KIAA0701 protein                                                                     |
| 1.04 | 0.38  | 0.66 | BC010931 | Hs.78881       | MEF2B          | MADS box transcription enhancer factor 2, polypeptide B (myocyte enhancer factor 2B) |
| 1.04 | 0.32  | 0.71 | BC017172 | Hs.79259       | FAIM2          | Fas apoptotic inhibitory molecule 2                                                  |
| 1.04 | 0.46  | 0.58 | BC008919 | Hs.155829      | CBR1           | carbonyl reductase 1                                                                 |
| 1.04 | 0.11  | 0.92 | BC010907 | Hs.52256       | FLJ20624       | hypothetical protein FLJ20624                                                        |
| 1.04 | -0.24 | 1.28 | BC002843 | Hs.433469      | HSPC043        | HSPC043 protein                                                                      |
| 1.04 | -0.19 | 1.23 | BC018633 | Hs.256583      | TETRAN         | tetracycline transporter-like protein                                                |
| 1.04 | -1.42 | 2.46 | BC016706 | Hs.106673      | SPAG9          | sperm associated antigen 9                                                           |
| 1.03 | 0.69  | 0.34 | BC004250 | Hs.400124      | KIAA0063       | KIAA0063 gene product                                                                |
| 1.03 | 0.39  | 0.65 | BC004931 | Hs.421608      | EIF3S7         | eukaryotic translation initiation factor 3, subunit 7 zeta, 66/67kDa                 |
| 1.03 | 0.64  | 0.39 | AB058759 | Hs.381163      | TUBA6          | tubulin alpha 6                                                                      |
| 1.03 | 0.27  | 0.76 | BC000423 | Hs.7476        | ATP6V0B        | ATPase, H+ transporting, lysosomal 21kDa, V0 subunit c''                             |
| 1.03 | -0.46 | 1.49 | BC007624 | Hs.322852      | CCNH           | cyclin H                                                                             |
| 1.03 | 0.53  | 0.50 | BC014101 | Hs.273357      | ALDH6A1        | aldehyde dehydrogenase 6 family, member A1                                           |
| 1.03 | -1.25 | 2.28 | BC018130 | Hs.154299      | KRT15          | keratin 15                                                                           |
| 1.03 | 0.85  | 0.18 | BC011940 | Data not found | FLJ21432       | hypothetical protein FLJ21432                                                        |
| 1.03 | 0.40  | 0.64 | BC013155 | Hs.330208      | SMUG1          | single-strand selective monofunctional uracil DNA glycosylase                        |
| 1.03 | 0.16  | 0.87 | BC007303 | Hs.334586      | HRB2           | HIV-1 rev binding protein 2                                                          |
| 1.03 | 0.84  | 0.19 | BC012571 | Hs.50889       | HUMMLC2B       | myosin light chain 2                                                                 |
| 1.03 | 0.03  | 1.00 | BC000241 | Hs.71787       | FLJ21839       | hypothetical protein FLJ21839                                                        |
| 1.03 | -0.31 | 1.33 | BC015625 | Hs.50441       | LOC57038       | similar to arginyl-tRNA synthetase                                                   |
| 1.03 | 0.86  | 0.17 | BC011746 | Hs.26267       | APOBEC3D       | apolipoprotein B mRNA editing enzyme, catalytic polypeptide-like 3D                  |
| 1.03 | -0.32 | 1.35 | BC013577 | Hs.31595       | CTSS           | cathepsin S                                                                          |
| 1.03 | -0.88 | 1.91 | BC020965 | Hs.287850      | FLJ10432       | hypothetical protein FLJ10432                                                        |
| 1.02 | 0.02  | 1.00 | BC004248 | Hs.170195      | SLC25A11       | solute carrier family 25 (mitochondrial carrier; oxoglutarate carrier), member 11    |
| 1.02 | -0.36 | 1.38 | BC002663 | Hs.298089      | KRAS2          | v-Ki-ras2 Kirsten rat sarcoma 2 viral oncogene homolog                               |
| 1.02 | -0.66 | 1.68 | BC015571 | Hs.50868       | MGC16037       | hypothetical protein MGC16037                                                        |
| 1.02 | -0.73 | 1.75 | BC014271 | Hs.76753       | FLJ10979       | hypothetical protein FLJ10979                                                        |
| 1.02 | 0.06  | 0.96 | BC016700 | Hs.9265        | DKFZP434J154   | DKFZP434J154 protein                                                                 |
| 1.02 | -0.22 | 1.24 | BC011519 | Hs.3697        | EIF3S7         | eukaryotic translation initiation factor 3, subunit 7 zeta, 66/67kDa                 |
| 1.02 | 0.12  | 0.90 | BC009047 | Hs.18953       | PRCC           | papillary renal cell carcinoma (translocation-associated)                            |
| 1.02 | -0.42 | 1.44 | BC013876 | Hs.278898      | EKI1           | ethanolamine kinase                                                                  |
| 1.02 | 0.21  | 0.81 | BC004540 | Hs.194286      | DNAJA2         | DnaJ (Hsp40) homolog, subfamily A, member 2                                          |
| 1.02 | 0.37  | 0.65 | BC002475 | Hs.408943      | MGC2396        | hypothetical zinc finger protein MGC2396                                             |



|          |       |      |          |                |                |                                                                                          |
|----------|-------|------|----------|----------------|----------------|------------------------------------------------------------------------------------------|
| 1.02     | 0.76  | 0.25 | BC013816 | Hs.46          | RPS28          | ribosomal protein S28                                                                    |
| 1.02     | 0.09  | 0.93 | BC000148 | Hs.184376      | SNAP23         | synaptosomal-associated protein, 23kDa                                                   |
| 1.02     | -0.29 | 1.30 | BC011927 | Hs.65234       | NA 4-14-03 141 |                                                                                          |
| 1.01     | 0.51  | 0.51 | BC016879 | Hs.29857       | GLUL           | glutamate-ammonia ligase (glutamine synthase)                                            |
| 1.01     | 0.29  | 0.73 | BC011453 | Hs.380833      | HNRPD          | heterogeneous nuclear ribonucleoprotein D (AU-rich element RNA binding protein 1, 37kDa) |
| 1.01     | 0.08  | 0.93 | BC001692 | Hs.33084       | SLC2A5         | solute carrier family 2 (facilitated glucose/fructose transporter), member 5             |
| 1.01     | 0.25  | 0.76 | BC009980 | Hs.343245      | AGTRAP         | angiotensin II receptor-associated protein                                               |
| 1.01     | -0.70 | 1.71 | BC008122 | Data not found | FLJ23306       | hypothetical protein FLJ23306                                                            |
| 1.01     | -0.25 | 1.26 | BC008092 | Hs.406511      |                |                                                                                          |
| 1.01     | 0.68  | 0.33 | BC012942 | Hs.180378      | LSM4           | LSM4 homolog, U6 small nuclear RNA associated (S. cerevisiae)                            |
| 1.01     | -0.15 | 1.16 | BC001400 | Hs.206501      | LOC57228       | hypothetical protein from clone 643                                                      |
| 1.01     | 0.49  | 0.52 | BC014781 | Hs.348401      | LIPT1          | lipoyltransferase                                                                        |
| 1.01     | 0.51  | 0.49 | BC009935 | Hs.181202      | CLK3           | CDC-like kinase 3                                                                        |
| 1.01     | 0.72  | 0.29 | BC006236 | Hs.99196       | MGC11324       | hypothetical protein MGC11324                                                            |
| 1.00     | 0.19  | 0.81 | BC004530 | Hs.15580       | PAFAH2         | platelet-activating factor acetylhydrolase 2, 40kDa                                      |
| 1.00     | -0.29 | 1.29 | BC001697 | Hs.433406      | RPS15A         | ribosomal protein S15a                                                                   |
| 1.00     | 0.54  | 0.46 | BC007073 | Hs.5085        | FABP5          | fatty acid binding protein 5 (psoriasis-associated)                                      |
| 1.00     | 0.28  | 0.72 | BC007696 | Hs.334604      | TIP47          | cargo selection protein (mannose 6 phosphate receptor binding protein)                   |
| 1.00     | -0.73 | 1.73 | BC011231 | Data not found | NA 4-14-03 392 |                                                                                          |
| 1.00     | 0.33  | 0.67 | BC005253 | Hs.106290      | KIAA0107       | KIAA0107 gene product                                                                    |
| 1.00     | -0.20 | 1.20 | BC014315 | Hs.30174       | E2-EPF         | ubiquitin carrier protein                                                                |
| 1.00     | -0.68 | 1.68 | BC001280 | Hs.250822      | STK6           | serine/threonine kinase 6                                                                |
| 0.99     | -0.10 | 1.09 | BC010356 | Hs.70333       | WAC            | WW domain-containing adapter with a coiled-coil region                                   |
| 0.99     | -0.07 | 1.07 | BC016147 | Hs.1119        | NSPC1          | likely ortholog of mouse nervous system polycomb 1                                       |
| 0.99     | -1.61 | 2.61 | BC013083 | Hs.304682      | DSCR5          | Down syndrome critical region gene 5                                                     |
| 0.99     | 0.79  | 0.21 | BC012179 | Hs.27931       | FLJ10830       | cytosolic nonspecific dipeptidase (EC 3.4.13.18)                                         |
| 0.99     | 0.86  | 0.13 | BC004143 | Hs.69771       | BF             | B-factor, properdin                                                                      |
| 0.99     | 0.90  | 0.09 | BC007613 | Hs.155392      | TSLP           | thymic stromal lymphopoietin                                                             |
| 0.99     | 0.71  | 0.28 | BC018346 | Hs.16165       | ZNF258         | zinc finger protein 258                                                                  |
| 0.99     | 0.69  | 0.30 | BC000694 | Hs.250493      | SCGN           | secretagogin, EF-hand calcium binding protein                                            |
| 0.99     | 0.96  | 0.03 | BC020566 | Hs.289271      | MGC12518       | similar to ZINC FINGER PROTEIN 257 (BONE MARROW ZINC FINGER 4)                           |
| (BMZF-4) |       |      |          |                |                |                                                                                          |
| 0.99     | 0.01  | 0.98 | BC009921 | Hs.130965      | SH2D3A         | SH2 domain containing 3A                                                                 |
| 0.99     | 0.31  | 0.68 | BC009416 | Hs.194864      | FLJ12448       | hypothetical protein FLJ12448                                                            |
| 0.99     | 0.16  | 0.83 | BC018514 | Hs.30246       | COMT           | catechol-O-methyltransferase                                                             |
| 0.99     | 0.38  | 0.61 | BC012863 | Hs.239         | CGI-105        | CGI-105 protein                                                                          |
| 0.99     | 0.34  | 0.65 | BC014225 | Hs.13775       | C9orf16        | chromosome 9 open reading frame 16                                                       |
| 0.99     | -0.93 | 1.92 | BC017423 | Hs.222746      | FLJ12949       | hypothetical protein FLJ12949                                                            |
| 0.99     | -0.74 | 1.73 | BC001886 | Hs.75319       | NA 4-14-03 82  |                                                                                          |
| 0.99     | -0.55 | 1.54 | BC010854 | Hs.3763        | CPR2           | cell cycle progression 2 protein                                                         |
| 0.99     | -0.56 | 1.54 | BC006541 | Hs.149846      | CED-6          | CED-6 protein                                                                            |
| 0.99     | 0.19  | 0.79 | BC009071 | Hs.42514       | C9orf9         | chromosome 9 open reading frame 9                                                        |
| 0.99     | 0.32  | 0.67 | BC009710 | Hs.100651      | NRN1           | neuritin 1                                                                               |
| 0.98     | 0.43  | 0.55 | BC003608 | Hs.80248       | MRPS21         | mitochondrial ribosomal protein S21                                                      |
| 0.98     | -1.69 | 2.67 | BC000150 | Hs.161279      | FLJ23360       | hypothetical protein FLJ23360                                                            |
| 0.98     | 0.34  | 0.64 | BC011973 | Hs.4932        | SMP1           | small membrane protein 1                                                                 |
| 0.98     | 0.70  | 0.28 | BC009699 | Data not found | NXT1           | NTF2-like export factor 1                                                                |
| 0.98     | -0.27 | 1.24 | BC014649 | Hs.17958       | KIAA1160       | KIAA1160 protein                                                                         |
| 0.98     | -0.78 | 1.75 | BC005033 | Hs.182485      | MSLN           | mesothelin                                                                               |
| 0.98     | -0.70 | 1.67 | BC015943 | Hs.348350      | MGC10911       | hypothetical protein MGC10911                                                            |
| 0.98     | 0.96  | 0.01 | BC003079 | Hs.180859      | LOC51142       | 16.7Kd protein                                                                           |
| 0.98     | -0.90 | 1.88 | BC004818 | Hs.4104        | HSPC210        | chromosome 14 open reading frame 129                                                     |
| 0.98     | -0.07 | 1.05 | BC012181 | Hs.59242       | VAT1           | vesicle amine transport protein 1 homolog (T californica)                                |

|      |       |      |          |                |                |                                                                                                                                            |
|------|-------|------|----------|----------------|----------------|--------------------------------------------------------------------------------------------------------------------------------------------|
| 0.97 | 0.86  | 0.11 | BC006134 | Hs.303653      | TPI1           | triosephosphate isomerase 1                                                                                                                |
| 0.97 | -0.26 | 1.23 | BC011399 | Hs.74101       | MYOD1          | myogenic factor 3                                                                                                                          |
| 0.97 | 0.40  | 0.57 | BC013278 | Hs.40342       | PFC            | properdin P factor, complement                                                                                                             |
| 0.97 | 0.92  | 0.05 | BC021620 | Hs.433387      | MGC10646       | hypothetical protein MGC10646                                                                                                              |
| 0.97 | 0.27  | 0.70 | BC009923 | Hs.69235       | HEI10          | enhancer of invasion 10                                                                                                                    |
| 0.97 | -2.74 | 3.71 | BC001745 | Hs.79404       | MGC5178        | hypothetical protein MGC5178                                                                                                               |
| 0.97 | -0.52 | 1.49 | BC010904 | Hs.23495       | FLJ11252       | HBxAg transactivated protein 1                                                                                                             |
| 0.97 | 0.63  | 0.33 | BC014191 | Hs.379380      | AKR1B10        | aldo-keto reductase family 1, member B10 (aldose reductase)                                                                                |
| 0.97 | -0.44 | 1.41 | BC001687 | Hs.427212      | NARS           | asparaginyl-tRNA synthetase                                                                                                                |
| 0.97 | -0.14 | 1.10 | BC003595 | Hs.9732        | MGC4368        | hypothetical protein MGC4368                                                                                                               |
| 0.97 | 0.26  | 0.70 | BC002509 | Hs.288217      | MGC2941        | hypothetical protein MGC2941                                                                                                               |
| 0.96 | -0.05 | 1.02 | BC009885 | Hs.83848       | NA 4-14-03 554 |                                                                                                                                            |
| 0.96 | 0.84  | 0.13 | BC015735 | Hs.154899      | NEK6           | NIMA (never in mitosis gene a)-related kinase 6                                                                                            |
| 0.96 | 0.85  | 0.12 | BC006496 | Hs.15456       | K-ALPHA-1      | tubulin, alpha, ubiquitous                                                                                                                 |
| 0.96 | -0.04 | 1.01 | BC011935 | Hs.240013      | FAM14B         | family with sequence similarity 14, member B                                                                                               |
| 0.96 | 0.37  | 0.59 | BC010858 | Hs.77256       | PTD015         | PTD015 protein                                                                                                                             |
| 0.96 | -0.06 | 1.01 | BC001821 | Hs.323949      | KAI1           | kangai 1 (suppression of tumorigenicity 6, prostate; CD82 antigen (R2 leukocyte antigen, antigen detected by monoclonal and antibody IA4)) |
| 0.95 | -0.22 | 1.17 | BC007235 | Hs.320834      | HSPC177        | hypothetical protein HSPC177                                                                                                               |
| 0.95 | 0.73  | 0.22 | BC004498 | Hs.283639      | FLJ12671       | hypothetical protein FLJ12671                                                                                                              |
| 0.95 | 0.08  | 0.87 | BC015786 | Data not found | PPP1R8         | protein phosphatase 1, regulatory (inhibitor) subunit 8                                                                                    |
| 0.95 | -0.68 | 1.64 | BC005864 | Hs.95577       | CDK4           | cyclin-dependent kinase 4                                                                                                                  |
| 0.95 | -0.69 | 1.64 | BC003164 | Hs.78768       | C6orf29        | chromosome 6 open reading frame 29                                                                                                         |
| 0.95 | 0.61  | 0.34 | BC002506 | Hs.28866       | PDCD10         | programmed cell death 10                                                                                                                   |
| 0.95 | -0.63 | 1.58 | BC015356 | Hs.82159       | IL18           | interleukin 18 (interferon-gamma-inducing factor)                                                                                          |
| 0.95 | -2.34 | 3.29 | BC019341 | Hs.211612      | SEC24A         | SEC24 related gene family, member A (S. cerevisiae)                                                                                        |
| 0.95 | -0.76 | 1.71 | BC000517 | Data not found | PPP2R5D        | protein phosphatase 2, regulatory subunit B (B56), delta isoform                                                                           |
| 0.95 | -0.38 | 1.33 | BC009073 | Hs.112654      | MID2           | midline 2                                                                                                                                  |
| 0.95 | 0.09  | 0.85 | BC009311 | Hs.75227       | CDC25C         | cell division cycle 25C                                                                                                                    |
| 0.94 | 0.37  | 0.58 | BC009383 | Hs.73452       | ASGR2          | asialoglycoprotein receptor 2                                                                                                              |
| 0.94 | 0.84  | 0.10 | BC008873 | Hs.288912      | MGC17528       |                                                                                                                                            |
| 0.94 | 0.53  | 0.42 | BC016051 | Hs.287863      | NA 4-14-03 447 |                                                                                                                                            |
| 0.94 | -0.04 | 0.99 | BC012359 | Hs.106671      | TCTA           | T-cell leukemia translocation altered gene                                                                                                 |
| 0.94 | 0.26  | 0.68 | BC004367 | Hs.240395      | RAB7L1         | RAB7, member RAS oncogene family-like 1                                                                                                    |
| 0.94 | 0.39  | 0.54 | BC011593 | Hs.344097      | NALP2          | NALP2 protein                                                                                                                              |
| 0.94 | -0.01 | 0.95 | BC016931 | Hs.30985       | FLJ20489       | hypothetical protein FLJ20489                                                                                                              |
| 0.94 | -0.37 | 1.31 | BC005828 | Hs.6262        |                |                                                                                                                                            |
| 0.94 | 0.24  | 0.69 | BC013879 | Hs.3838        | PLTP           | phospholipid transfer protein                                                                                                              |
| 0.94 | 0.08  | 0.86 | BC010647 | Hs.84389       | MADH4          | MAD, mothers against decapentaplegic homolog 4 (Drosophila)                                                                                |
| 0.94 | 0.70  | 0.24 | BC005321 | Hs.332405      | CCBP2          | chemokine binding protein 2                                                                                                                |
| 0.94 | 0.10  | 0.83 | BC014001 | Hs.76591       | MGC2654        | hypothetical protein MGC2654                                                                                                               |
| 0.93 | -0.19 | 1.13 | BC015814 | Hs.106614      | FLJ22215       | hypothetical protein FLJ22215                                                                                                              |
| 0.93 | -0.33 | 1.27 | BC007323 | Hs.193313      | ADSL           | adenylosuccinate lyase                                                                                                                     |
| 0.93 | -0.46 | 1.40 | BC016855 | Hs.181243      | ELA3A          | elastase 3A, pancreatic (protease E)                                                                                                       |
| 0.93 | 0.17  | 0.77 | BC009567 | Hs.159440      | MGC12679       | hypothetical protein MGC12679                                                                                                              |
| 0.93 | -0.92 | 1.86 | BC005324 | Hs.78224       | SMBP           | SM-11044 binding protein                                                                                                                   |
| 0.93 | -0.06 | 0.99 | BC003523 | Hs.181173      | LIMR           | lipocalin-interacting membrane receptor                                                                                                    |
| 0.93 | 0.75  | 0.17 | BC008917 | Hs.42806       | MT3            | metallothionein 3 (growth inhibitory factor (neurotrophic))                                                                                |
| 0.93 | 0.43  | 0.50 | BC009993 | Data not found | FLJ23186       | hypothetical protein FLJ23186                                                                                                              |
| 0.93 | 0.60  | 0.33 | BC010649 | Hs.3945        | ATP6V0B        | ATPase, H <sup>+</sup> transporting, lysosomal 21kDa, V0 subunit c''                                                                       |
| 0.93 | 0.43  | 0.49 | BC017032 | Hs.194710      | RPLP2          |                                                                                                                                            |
| 0.92 | 0.83  | 0.09 | BC014656 | Hs.15259       | HPRP3P         | U4/U6-associated RNA splicing factor                                                                                                       |
| 0.92 | 0.89  | 0.03 | BC009829 | Hs.405885      | NA 4-14-03 550 |                                                                                                                                            |

|      |       |      |          |                      |                |                                                                                                  |
|------|-------|------|----------|----------------------|----------------|--------------------------------------------------------------------------------------------------|
| 0.92 | -1.61 | 2.54 | BC009962 | Hs.279939            | TRIP4          | thyroid hormone receptor interactor 4                                                            |
| 0.92 | 0.24  | 0.68 | BC004244 | Hs.821               | MGC10200       | hypothetical protein MGC:10200                                                                   |
| 0.92 | -0.34 | 1.26 | BC001777 | Hs.288654            | PSMB7          | proteasome (prosome, macropain) subunit, beta type, 7                                            |
| 0.92 | 0.43  | 0.49 | BC004366 | Hs.302446            | LOC51042       | zinc finger protein                                                                              |
| 0.92 | -0.01 | 0.93 | BC001022 | Hs.184011            | CRSP8          |                                                                                                  |
| 0.92 | -0.93 | 1.85 | BC013903 | Hs.155191            | ILVBL          | ilvB (bacterial acetolactate synthase)-like                                                      |
| 0.92 | -1.25 | 2.17 | BC006122 | Hs.13024             | NA 4-14-03 433 |                                                                                                  |
| 0.92 | -0.69 | 1.61 | BC007750 | Hs.85524             | MGC3262        | hypothetical protein MGC3262                                                                     |
| 0.92 | 0.61  | 0.31 | BC007052 | Hs.418901            | BBX            | bobby sox homolog (Drosophila)                                                                   |
| 0.92 | 0.37  | 0.55 | BC003552 | Hs.155560            | DDX1           | DEAD/H (Asp-Glu-Ala-Asp/His) box polypeptide 1                                                   |
| 0.92 | 0.60  | 0.32 | BC009876 | Hs.184519            | MI-ER1         | mesoderm induction early response 1                                                              |
| 0.92 | -0.44 | 1.35 | BC007932 | Hs.26270             | GOLGA2         | golgi autoantigen, golgin subfamily a, 2                                                         |
| 0.91 | 0.58  | 0.33 | BC013003 | Hs.84264             | CKS1B          | CDC28 protein kinase regulatory subunit 1B                                                       |
| 0.91 | 0.73  | 0.19 | BC008071 | Hs.169531            | GNB2L1         | guanine nucleotide binding protein (G protein), beta polypeptide 2-like 1                        |
| 0.91 | 0.33  | 0.58 | BC007330 | Hs.108258            | NA 4-14-03 221 |                                                                                                  |
| 0.91 | -0.76 | 1.66 | BC015566 | Hs.380447            | NFE2           | nuclear factor (erythroid-derived 2), 45kDa                                                      |
| 0.91 | 0.18  | 0.73 | BC015805 | Data not found       | DKFZP547E1010  | DKFZP547E1010 protein                                                                            |
| 0.91 | 0.47  | 0.44 | BC006214 | Hs.26110             | CGI-128        | CGI-128 protein                                                                                  |
| 0.91 | 0.73  | 0.17 | BC011372 | Hs.154576            | RPS13          | ribosomal protein S13                                                                            |
| 0.90 | -0.01 | 0.91 | BC015866 | Hs.348334            |                |                                                                                                  |
| 0.90 | 0.41  | 0.49 | BC003152 | Hs.7854              | EGFR-RS        | likely ortholog of mouse epidermal growth factor receptor, related sequence                      |
| 0.90 | -0.12 | 1.02 | BC006403 | Hs.54589             | GTPBG3         | mitochondrial GTP binding protein                                                                |
| 0.90 | 0.36  | 0.54 | BC015816 | Hs.101474            | ELKS           | ELKS protein                                                                                     |
| 0.90 | -0.33 | 1.23 | BC002342 | Hs.17377             | BCAN           | chondroitin sulfate proteoglycan BEHAB/brevican                                                  |
| 0.90 | 0.67  | 0.23 | BC006404 | Hs.21263             | POLR2D         | polymerase (RNA) II (DNA directed) polypeptide D                                                 |
| 0.90 | 0.48  | 0.42 | BC013280 | Hs.298553            | C20orf140      | chromosome 20 open reading frame 140                                                             |
| 0.90 | 0.52  | 0.37 | BC007221 | Hs.22880             | KIAA1165       | Nedd4 family interacting protein 2                                                               |
| 0.90 | -0.78 | 1.68 | BC016161 | Hs.134185            | MGC15476       | thymus expressed gene 3-like                                                                     |
| 0.89 | -0.47 | 1.36 | BC000135 | Hs.78769             | THOP1          | thimet oligopeptidase 1                                                                          |
| 0.89 | -0.52 | 1.41 | BC014546 | Hs.393201            | ACTR2          | ARP2 actin-related protein 2 homolog (yeast)                                                     |
| 0.89 | 0.76  | 0.14 | BC001392 | Hs.311640            | RPS27A         | ribosomal protein S27a                                                                           |
| 0.89 | 0.36  | 0.53 | BC002477 | Hs.271586            | MGC4093        | hypothetical protein MGC4093                                                                     |
| 0.89 | -0.26 | 1.15 | BC006143 | Hs.333389            | SYNGR3         | synaptogyrin 3                                                                                   |
| 0.89 | 0.76  | 0.13 | BC000905 | Hs.227327            | RAB1A          | RAB1A, member RAS oncogene family                                                                |
| 0.89 | -0.06 | 0.95 | BC004373 | In multiple clusters | FLJ10504       | misato                                                                                           |
| 0.89 | -1.09 | 1.98 | BC007310 | Hs.332563            | KIAA1143       | KIAA1143 protein                                                                                 |
| 0.89 | 0.51  | 0.37 | BC012125 | Hs.284205            | RPS24          | ribosomal protein S24                                                                            |
| 0.88 | -0.44 | 1.33 | BC008910 | Hs.1690              | NA 4-14-03 226 |                                                                                                  |
| 0.88 | 0.28  | 0.60 | BC007996 | Hs.286               | HNRPF          | heterogeneous nuclear ribonucleoprotein F                                                        |
| 0.88 | 0.21  | 0.67 | BC000184 | Hs.11776             | KIAA1169       | two-pore channel 1, homolog                                                                      |
| 0.88 | 0.45  | 0.43 | BC015923 | Hs.347964            | DKFZP566F0546  | DKFZP566F0546 protein                                                                            |
| 0.88 | 0.16  | 0.73 | BC004935 | Hs.102910            | FLJ20695       | hypothetical protein FLJ20695                                                                    |
| 0.88 | 0.66  | 0.22 | BC013998 | Hs.92282             | FLJ14107       | hypothetical protein FLJ14107                                                                    |
| 0.88 | -0.28 | 1.17 | BC014157 | Hs.348316            | FLJ22795       | hypothetical protein FLJ22795                                                                    |
| 0.88 | -0.24 | 1.12 | BC001254 | Hs.342849            | ARL5           | ADP-ribosylation factor-like 5                                                                   |
| 0.88 | 0.58  | 0.30 | BC001174 | Hs.184161            | HINT1          | histidine triad nucleotide binding protein 1                                                     |
| 0.88 | 0.04  | 0.84 | BC012078 | Hs.30783             | DPH2L2         | diphtheria toxin resistance protein required for diphthamide biosynthesis-like 2 (S. cerevisiae) |
| 0.88 | 0.61  | 0.26 | BC007646 | Hs.177926            | LOC51142       | 16.7Kd protein                                                                                   |
| 0.88 | 0.30  | 0.57 | BC011027 | Hs.23581             | HSOBRGRP       | leptin receptor gene-related protein                                                             |
| 0.88 | 0.20  | 0.68 | BC006528 | Hs.74107             | MGC13008       | hypothetical protein MGC13008                                                                    |
| 0.88 | 0.03  | 0.85 | BC012328 | Hs.132748            | FLJ10307       | hypothetical protein FLJ10307                                                                    |
| 0.87 | -0.17 | 1.04 | BC007373 | Hs.334714            | FLJ14639       | hypothetical protein FLJ14639                                                                    |
| 0.87 | 0.00  | 0.87 | BC013007 | Hs.68257             | ZNF31          | zinc finger protein 31 (KOX 29)                                                                  |

|      |       |      |           |                |                |                                                                                             |
|------|-------|------|-----------|----------------|----------------|---------------------------------------------------------------------------------------------|
| 0.87 | -1.12 | 1.99 | BC011696  | Hs.155020      | GPRC5C         | G protein-coupled receptor, family C, group 5, member C                                     |
| 0.87 | -0.01 | 0.88 | BC000494  | Hs.170001      | EIF2B2         | eukaryotic translation initiation factor 2B, subunit 2 beta, 39kDa                          |
| 0.87 | -1.74 | 2.61 | BC000699  | Hs.4975        | EXO1           | exonuclease 1                                                                               |
| 0.87 | -0.52 | 1.39 | BC001230  | Hs.108408      | APH-1A         | likely ortholog of <i>C. elegans</i> anterior pharynx defective 1A                          |
| 0.87 | -0.80 | 1.67 | BC000296  | Hs.15519       | SPOP           | speckle-type POZ protein                                                                    |
| 0.86 | -0.01 | 0.88 | BC013323  | Hs.78950       | FLJ10241       | hypothetical protein FLJ10241                                                               |
| 0.86 | 0.03  | 0.84 | BC011571  | Hs.98074       | COPE           | coatamer protein complex, subunit epsilon                                                   |
| 0.86 | -0.21 | 1.07 | BC020079  | Hs.152931      | NRBF-2         | nuclear receptor binding factor-2                                                           |
| 0.86 | 0.10  | 0.77 | BC008369  | Hs.96870       | HYAL3          | hyaluronoglucosaminidase 3                                                                  |
| 0.86 | 0.82  | 0.04 | BC012176  | Hs.240951      | MGC4614        | hypothetical protein MGC4614                                                                |
| 0.86 | -0.12 | 0.98 | BC001164  | Hs.78466       | HMOX1          | heme oxygenase (decycling) 1                                                                |
| 0.86 | -0.22 | 1.08 | BC000177  | Hs.181195      | DNAJB6         | DnaJ (Hsp40) homolog, subfamily B, member 6                                                 |
| 0.86 | 0.57  | 0.29 | NM_006779 | Hs.12289       | GTF2H1         | general transcription factor IIH, polypeptide 1, 62kDa                                      |
| 0.86 | -0.41 | 1.27 | BC009594  | Hs.7917        | HIG1           | likely ortholog of mouse hypoxia induced gene 1                                             |
| 0.86 | -0.24 | 1.10 | BC004156  | Hs.426460      | RPL9           | ribosomal protein L9                                                                        |
| 0.86 | -0.50 | 1.36 | BC014520  | Hs.80132       | FUSIP1         | FUS interacting protein (serine-arginine rich) 1                                            |
| 0.86 | 0.48  | 0.38 | BC007387  | Hs.288716      | FLJ13614       | hypothetical protein FLJ13614                                                               |
| 0.86 | 0.09  | 0.77 | BC000017  | Hs.152894      | ATP5F1         | ATP synthase, H <sup>+</sup> transporting, mitochondrial F0 complex, subunit b, isoform 1   |
| 0.86 | 0.85  | 0.01 | BC007776  | Hs.233765      | K-ALPHA-1      | tubulin, alpha, ubiquitous                                                                  |
| 0.86 | -0.73 | 1.59 | BC008230  | Hs.405042      | NA 4-14-03 60  |                                                                                             |
| 0.86 | 0.00  | 0.86 | BC013981  | Hs.180895      | RNGTT          | RNA guanylyltransferase and 5'-phosphatase                                                  |
| 0.86 | 0.38  | 0.48 | BC016774  | Hs.217493      | SLC25A6        | solute carrier family 25 (mitochondrial carrier; adenine nucleotide translocator), member 6 |
| 0.86 | 0.55  | 0.31 | BC008360  | Hs.258494      | C21orf51       | chromosome 21 open reading frame 51                                                         |
| 0.86 | -0.58 | 1.44 | BC000515  | Hs.26009       | LOC113026      | similar to phospholipase C, delta                                                           |
| 0.86 | 0.78  | 0.07 | BC011054  | Hs.334878      | PCM1           | pericentriolar material 1                                                                   |
| 0.86 | -0.17 | 1.02 | BC010640  | Hs.166684      | EIF3S2         | eukaryotic translation initiation factor 3, subunit 2 beta, 36kDa                           |
| 0.86 | -0.63 | 1.49 | BC004260  | Hs.112218      | FLJ20457       | hypothetical protein FLJ20457                                                               |
| 0.86 | 0.67  | 0.18 | BC006464  | Hs.425808      | CALM2          | calmodulin 2 (phosphorylase kinase, delta)                                                  |
| 0.85 | -0.07 | 0.93 | BC021668  | Hs.355719      | LZIC           | leucine zipper and CTNNBIP1 domain containing                                               |
| 0.85 | 0.05  | 0.80 | BC005143  | Hs.92384       | GTPBG3         | mitochondrial GTP binding protein                                                           |
| 0.85 | 0.42  | 0.43 | BC013437  | Hs.182280      | FLJ10346       | hypothetical protein FLJ10346                                                               |
| 0.85 | -0.53 | 1.39 | NM_005950 | Hs.433391      | COX7B          | cytochrome c oxidase subunit VIIb                                                           |
| 0.85 | -0.94 | 1.80 | BC004383  | Hs.172550      | VAT1           | vesicle amine transport protein 1 homolog (T californica)                                   |
| 0.85 | -0.29 | 1.14 | BC011621  | Hs.250752      | MGC13204       | hypothetical protein MGC13204                                                               |
| 0.85 | 0.49  | 0.37 | BC011674  | Hs.153357      | RAB7           | RAB7, member RAS oncogene family                                                            |
| 0.85 | 0.42  | 0.44 | BC003690  | Hs.61790       | FLJ23338       | importin 4                                                                                  |
| 0.85 | 0.36  | 0.49 | BC005010  | Hs.78909       | HLA-E          | major histocompatibility complex, class I, E                                                |
| 0.85 | 0.59  | 0.26 | BC009824  | Hs.68090       | PWP2H          | PWP2 periodic tryptophan protein homolog (yeast)                                            |
| 0.85 | -0.23 | 1.08 | BC001709  | Hs.220324      | BAIAP2         | BAII-associated protein 2                                                                   |
| 0.85 | 0.03  | 0.81 | BC010661  | Hs.48403       | MGC4707        | hypothetical protein MGC4707                                                                |
| 0.85 | -0.15 | 1.00 | BC006570  | Hs.110837      | INVS           | inversin                                                                                    |
| 0.85 | -0.22 | 1.07 | BC013768  | Hs.63788       | GGCX           | gamma-glutamyl carboxylase                                                                  |
| 0.85 | -0.89 | 1.73 | BC000806  | Hs.351475      | POLR2K         | polymerase (RNA) II (DNA directed) polypeptide K, 7.0kDa                                    |
| 0.84 | -0.22 | 1.06 | BC016926  | Hs.74552       | NA 4-14-03 111 |                                                                                             |
| 0.84 | -1.10 | 1.94 | BC011679  | Hs.36574       | NA 4-14-03 242 |                                                                                             |
| 0.84 | 0.11  | 0.74 | BC009327  | Hs.374534      | FLJ00026       | hypothetical protein FLJ00026                                                               |
| 0.84 | -0.12 | 0.96 | BC008602  | Hs.129758      | EIF3S3         | eukaryotic translation initiation factor 3, subunit 3 gamma, 40kDa                          |
| 0.84 | -1.32 | 2.16 | BC001531  | Hs.315167      | MGC3329        | hypothetical protein MGC3329                                                                |
| 0.84 | -0.33 | 1.18 | BC000992  | Hs.10526       | CSRP2          | cysteine and glycine-rich protein 2                                                         |
| 0.84 | -0.44 | 1.28 | BC012395  | Hs.89606       | DKC1           | dyskeratosis congenita 1, dyskerin                                                          |
| 0.84 | -0.35 | 1.19 | BC005884  | Data not found | NA 4-14-03 336 |                                                                                             |
| 0.84 | -0.09 | 0.93 | BC007639  | Hs.104938      | C15orf15       | chromosome 15 open reading frame 15                                                         |

|      |       |      |          |                      |                |                                                             |
|------|-------|------|----------|----------------------|----------------|-------------------------------------------------------------|
| 0.84 | -0.21 | 1.05 | BC001688 | Hs.352415            | SLC39A4        | solute carrier family 39 (zinc transporter), member 4       |
| 0.84 | 0.26  | 0.58 | BC012162 | Hs.7165              | POLE3          | polymerase (DNA directed), epsilon 3 (p17 subunit)          |
| 0.84 | 0.07  | 0.77 | BC010956 | Hs.374988            | FGF7           | fibroblast growth factor 7 (keratinocyte growth factor)     |
| 0.84 | 0.11  | 0.73 | BC004884 | Hs.326744            | NA 4-14-03 271 |                                                             |
| 0.84 | -0.11 | 0.95 | BC010850 | Hs.272688            | PPARD          | peroxisome proliferative activated receptor, delta          |
| 0.84 | 0.62  | 0.22 | BC017114 | Hs.118183            | C11orf10       | chromosome 11 open reading frame 10                         |
| 0.84 | 0.59  | 0.25 | BC013782 | Hs.78935             | MGC5466        | hypothetical protein MGC5466                                |
| 0.83 | -0.13 | 0.96 | BC004858 | Hs.430121            | ITM2B          | integral membrane protein 2B                                |
| 0.83 | -1.32 | 2.15 | BC005064 | Hs.13972             | ANKH           | ankylosis, progressive homolog (mouse)                      |
| 0.83 | -0.31 | 1.14 | BC014424 | Data not found       | MGC4618        | hypothetical protein MGC4618                                |
| 0.83 | 0.38  | 0.45 | BC009906 | Hs.173103            | FLJ20303       | hypothetical protein FLJ20303                               |
| 0.83 | -0.14 | 0.98 | BC009441 | Hs.180903            | CTSG           | cathepsin G                                                 |
| 0.83 | -0.71 | 1.54 | BC000654 | Hs.242463            | PSMD11         | proteasome (prosome, macropain) 26S subunit, non-ATPase, 11 |
| 0.83 | 0.39  | 0.45 | BC009698 | Hs.268571            | DUSP4          | dual specificity phosphatase 4                              |
| 0.83 | -0.28 | 1.12 | BC000481 | Hs.198281            | PKM2           | pyruvate kinase, muscle                                     |
| 0.83 | 0.62  | 0.21 | BC011776 | Hs.300772            | HLA-DOA        | major histocompatibility complex, class II, DO alpha        |
| 0.83 | -0.35 | 1.18 | BC005932 | Hs.82159             | PCTK1          | PCTAIRE protein kinase 1                                    |
| 0.83 | 0.64  | 0.19 | BC008718 | Hs.1578              | GRIM19         | cell death-regulatory protein GRIM19                        |
| 0.83 | -0.38 | 1.21 | BC017301 | Hs.5345              | HTF9C          | HpaII tiny fragments locus 9C                               |
| 0.83 | 0.54  | 0.28 | BC013172 | Data not found       | MGC3222        | hypothetical protein MGC3222                                |
| 0.83 | 0.18  | 0.65 | BC012081 | Hs.238270            | MIC2           | CD99 antigen                                                |
| 0.83 | 0.16  | 0.67 | BC015801 | Hs.64016             | RFC2           | replication factor C (activator 1) 2, 40kDa                 |
| 0.83 | 0.55  | 0.28 | BC004922 | Hs.420106            | MGC15619       | hypothetical protein MGC15619                               |
| 0.83 | -0.34 | 1.17 | BC003093 | Hs.377992            | MGC10715       | novel C2H2 type zinc finger protein                         |
| 0.82 | 0.27  | 0.56 | BC014300 | Data not found       | C22orf20       | chromosome 22 open reading frame 20                         |
| 0.82 | -0.12 | 0.95 | BC001857 | Hs.95867             | LAGY           | homeodomain-only protein                                    |
| 0.82 | -0.84 | 1.67 | BC015156 | Hs.418650            | IL13RA1        | interleukin 13 receptor, alpha 1                            |
| 0.82 | -0.59 | 1.41 | BC004271 | Hs.217112            | TAPBP-R        | TAP binding protein related                                 |
| 0.82 | 0.38  | 0.45 | BC021285 | Hs.424414            | PXMP2          | peroxisomal membrane protein 2, 22kDa                       |
| 0.82 | -0.18 | 1.00 | BC004202 | Hs.20295             | LCMT           | leucine carboxyl methyltransferase 1                        |
| 0.82 | -0.95 | 1.77 | BC014573 | Hs.154938            | CALR           | calreticulin                                                |
| 0.82 | -0.07 | 0.89 | BC006358 | Hs.66048             | BAT1           | HLA-B associated transcript 1                               |
| 0.82 | -0.37 | 1.19 | BC012815 | Hs.94395             | C20orf154      | chromosome 20 open reading frame 154                        |
| 0.82 | 0.72  | 0.10 | BC016281 | Hs.227817            | TUBA6          | tubulin alpha 6                                             |
| 0.82 | 0.02  | 0.80 | BC007424 | Hs.374973            | PRPF4          | PRP4 pre-mRNA processing factor 4 homolog (yeast)           |
| 0.82 | 0.67  | 0.15 | BC009713 | Hs.380938            | FLJ20337       | hypothetical protein FLJ20337                               |
| 0.82 | -0.61 | 1.43 | BC011130 | Hs.254105            | LOC51256       | hypothetical protein LOC51256                               |
| 0.82 | 0.05  | 0.76 | BC011713 | Hs.9925              | KIAA1811       | KIAA1811 protein                                            |
| 0.82 | -0.12 | 0.93 | BC000004 | Hs.146329            | RPS2           | ribosomal protein S2                                        |
| 0.81 | 0.42  | 0.39 | BC000907 | Hs.99598             | MGC5338        | hypothetical protein MGC5338                                |
| 0.81 | 0.53  | 0.28 | BC005344 | Hs.284162            | CGI-141        | CGI-141 protein                                             |
| 0.81 | 0.21  | 0.61 | BC003564 | Hs.90336             | DKFZP564K2062  | DKFZP564K2062 protein                                       |
| 0.81 | 0.24  | 0.57 | BC009299 | Hs.7236              | VIL1           | villin 1                                                    |
| 0.81 | 0.24  | 0.57 | BC015655 | Hs.263928            | SORT1          | sortilin 1                                                  |
| 0.81 | 0.47  | 0.34 | BC006377 | Hs.18079             | MGC4730        | similar to RIKEN cDNA 3110001D03 gene (M. musculus)         |
| 0.81 | 0.02  | 0.79 | BC006218 | Hs.28088             | LOC51308       | SGC32445 protein                                            |
| 0.81 | 0.00  | 0.81 | BC010362 | In multiple clusters | VPS35          |                                                             |
| 0.81 | 0.31  | 0.50 | BC000979 | Hs.143187            | FLJ10432       | hypothetical protein FLJ10432                               |
| 0.81 | 0.32  | 0.49 | BC011400 | Hs.265960            | PEX16          | peroxisomal biogenesis factor 16                            |
| 0.81 | -0.54 | 1.35 | BC002577 | Hs.82159             | HCA127         | hepatocellular carcinoma-associated antigen 127             |
| 0.81 | -1.51 | 2.32 | BC002334 | Hs.75416             | HAND1          | heart and neural crest derivatives expressed 1              |
| 0.81 | -0.20 | 1.00 | BC015385 | Hs.1191              | GDBR1          | putative glioblastoma cell differentiation-related          |
| 0.81 | -0.07 | 0.88 | BC016710 | Hs.79300             | LOC51219       | clone FLB5214                                               |

|      |       |      |           |                |           |                                                                                                                                    |                                                                                         |
|------|-------|------|-----------|----------------|-----------|------------------------------------------------------------------------------------------------------------------------------------|-----------------------------------------------------------------------------------------|
| 0.81 | -0.03 | 0.83 | BC003177  | Hs.156667      |           | NA 4-14-03 43                                                                                                                      |                                                                                         |
| 0.81 | -0.07 | 0.87 | BC014967  | Hs.5637        | RTN4      | reticulon 4                                                                                                                        |                                                                                         |
| 0.80 | -0.76 | 1.56 | BC006457  | Hs.380749      | CLTB      | clathrin, light polypeptide (Lcb)                                                                                                  |                                                                                         |
| 0.80 | 0.47  | 0.34 | BC015365  | Hs.13740       | JTV1      | JTV1 gene                                                                                                                          |                                                                                         |
| 0.80 | 0.23  | 0.57 | BC006190  | Hs.171834      | PCTK1     | PCTAIRE protein kinase 1                                                                                                           |                                                                                         |
| 0.80 | 0.29  | 0.52 | BC006494  | Hs.79110       | NCL       | nucleolin                                                                                                                          |                                                                                         |
| 0.80 | -0.45 | 1.25 | BC001487  | Hs.193989      | HSPC142   | HSPC142 protein                                                                                                                    |                                                                                         |
| 0.80 | 0.14  | 0.66 | BC006320  | Hs.30318       | RBMS1     | RNA binding motif, single stranded interacting protein 1                                                                           |                                                                                         |
| 0.80 | 0.61  | 0.19 | BC005265  | Hs.346918      | MAGOH     | mago-nashi homolog, proliferation-associated (Drosophila)                                                                          |                                                                                         |
| 0.80 | -0.22 | 1.02 | BC007289  | Hs.135411      | HCS       | cytochrome c, somatic                                                                                                              |                                                                                         |
| 0.80 | -0.04 | 0.84 | BC011577  | Hs.334775      | GYS1      | glycogen synthase 1 (muscle)                                                                                                       |                                                                                         |
| 0.80 | 0.56  | 0.25 | BC007094  | Hs.302740      |           | NA 4-14-03 102                                                                                                                     |                                                                                         |
| 0.80 | -1.08 | 1.88 | BC002811  | Data not found | AP1M1     | adaptor-related protein complex 1, mu 1 subunit                                                                                    |                                                                                         |
| 0.80 | 0.58  | 0.22 | BC000018  | Hs.315164      | EIF2C2    | eukaryotic translation initiation factor 2C, 2                                                                                     |                                                                                         |
| 0.80 | -0.19 | 0.99 | BC015206  | Hs.433898      | RBMS1     | RNA binding motif, single stranded interacting protein 1                                                                           |                                                                                         |
| 0.80 | 0.36  | 0.44 | BC002499  | Hs.250282      | STK6      | serine/threonine kinase 6                                                                                                          |                                                                                         |
| 0.80 | 0.17  | 0.62 | BC012184  | Hs.67619       | ARF6      | ADP-ribosylation factor 6                                                                                                          |                                                                                         |
| 0.80 | -0.01 | 0.81 | BC020500  | Hs.22879       | FLJ39653  | hypothetical protein FLJ39653                                                                                                      |                                                                                         |
| 0.80 | 0.60  | 0.19 | NM_005762 | Hs.228059      | SLC9A1    | solute carrier family 9 (sodium/hydrogen exchanger), isoform 1 (antiporter, Na <sup>+</sup> /H <sup>+</sup> , amiloride sensitive) |                                                                                         |
| 0.80 | -0.98 | 1.77 | BC007452  | Hs.231840      |           | WBP2                                                                                                                               | WW domain binding protein 2                                                             |
| 0.80 | 0.11  | 0.69 | BC016284  | Hs.15164       | KIAA0998  | KIAA0998 protein                                                                                                                   |                                                                                         |
| 0.79 | 0.59  | 0.20 | BC007722  | Hs.293885      |           | MGC4677                                                                                                                            | hypothetical protein MGC4677                                                            |
| 0.79 | -0.37 | 1.17 | BC014264  | Hs.348553      |           | EEG1                                                                                                                               | EEG1                                                                                    |
| 0.79 | -0.22 | 1.01 | BC002921  | Hs.20447       | SLC5A6    | solute carrier family 5 (sodium-dependent vitamin transporter), member 6                                                           |                                                                                         |
| 0.79 | -0.04 | 0.83 | BC006180  | Hs.153261      |           | IGHM                                                                                                                               | immunoglobulin heavy constant mu                                                        |
| 0.79 | 0.34  | 0.45 | BC015813  | Hs.256184      |           | RAC1                                                                                                                               | ras-related C3 botulinum toxin substrate 1 (rho family, small GTP binding protein Rac1) |
| 0.79 | 0.09  | 0.70 | BC000813  | Hs.83916       | NDUFA5    | NADH dehydrogenase (ubiquinone) 1 alpha subcomplex, 5, 13kDa                                                                       |                                                                                         |
| 0.79 | -1.16 | 1.95 | BC010433  | Hs.411818      |           | FLJ22582                                                                                                                           | hypothetical protein FLJ22582                                                           |
| 0.79 | 0.33  | 0.46 | BC008901  | Hs.111092      |           | MGC23401                                                                                                                           | hypothetical protein MGC23401                                                           |
| 0.79 | -0.22 | 1.01 | BC007601  | Hs.71941       | LOC51759  | hepatocellular carcinoma-associated antigen 59                                                                                     |                                                                                         |
| 0.79 | -0.46 | 1.25 | BC011708  | Hs.274313      |           | PDCD6IP                                                                                                                            | programmed cell death 6 interacting protein                                             |
| 0.79 | 0.05  | 0.74 | BC017329  | Hs.278502      |           | ACTC                                                                                                                               | actin, alpha, cardiac muscle                                                            |
| 0.79 | 0.59  | 0.19 | BC016180  | Hs.274691      |           | MDH2                                                                                                                               | malate dehydrogenase 2, NAD (mitochondrial)                                             |
| 0.78 | 0.37  | 0.42 | BC012527  | Hs.197540      |           | NORE1                                                                                                                              | NORE1 protein                                                                           |
| 0.78 | -1.09 | 1.88 | BC002649  | Hs.7644        | COPS7B    | COP9 constitutive photomorphogenic homolog subunit 7B (Arabidopsis)                                                                |                                                                                         |
| 0.78 | 0.31  | 0.47 | BC012057  | Data not found |           | CCNI                                                                                                                               | cyclin I                                                                                |
| 0.78 | 0.18  | 0.60 | BC006994  | Hs.125565      |           | C20orf111                                                                                                                          | chromosome 20 open reading frame 111                                                    |
| 0.78 | 0.27  | 0.51 | BC005984  | Hs.44296       | IL11RA    | interleukin 11 receptor, alpha                                                                                                     |                                                                                         |
| 0.78 | 0.74  | 0.04 | BC000299  | Hs.43505       | SNAP23    | synaptosomal-associated protein, 23kDa                                                                                             |                                                                                         |
| 0.78 | -0.45 | 1.23 | BC000697  | Hs.184352      |           | DATF1                                                                                                                              | death associated transcription factor 1                                                 |
| 0.78 | -0.07 | 0.85 | BC011670  | Data not found |           | SFXN1                                                                                                                              | sideroflexin 1                                                                          |
| 0.78 | 0.13  | 0.64 | BC008023  | Hs.62112       | HIF1AN    | hypoxia-inducible factor 1, alpha subunit inhibitor                                                                                |                                                                                         |
| 0.78 | 0.53  | 0.24 | BC008607  | Hs.23410       | D21S2056E | DNA segment on chromosome 21 (unique) 2056 expressed sequence                                                                      |                                                                                         |
| 0.78 | -0.52 | 1.30 | BC015059  | Hs.16606       |           | CGI-32                                                                                                                             | CGI-32 protein                                                                          |
| 0.78 | 0.28  | 0.50 | BC014067  | Hs.73986       |           | FKBP4                                                                                                                              | FK506 binding protein 4, 59kDa                                                          |
| 0.78 | 0.17  | 0.60 | BC010671  | Hs.301305      |           | BCS1L                                                                                                                              | BCS1-like (yeast)                                                                       |
| 0.78 | -0.57 | 1.35 | BC009857  | Data not found |           | SNAPC1                                                                                                                             | small nuclear RNA activating complex, polypeptide 1, 43kDa                              |
| 0.78 | 0.36  | 0.41 | BC001864  | Hs.323432      |           | ICAMI                                                                                                                              | intercellular adhesion molecule 1 (CD54), human rhinovirus receptor                     |
| 0.77 | 0.24  | 0.54 | BC007632  | Hs.65746       | MGC24447  | chromosome 14 open reading frame 147                                                                                               |                                                                                         |
| 0.77 | 0.07  | 0.70 | BC008618  | Data not found |           | SPAG5                                                                                                                              | sperm associated antigen 5                                                              |
| 0.77 | 0.26  | 0.51 | BC007352  | Hs.6980        | PXN       | paxillin                                                                                                                           |                                                                                         |
| 0.77 | 0.51  | 0.26 | BC001701  | Hs.378162      |           | HSPC018                                                                                                                            | HSPC018 protein                                                                         |

|      |       |      |          |                |                |                                                                                  |
|------|-------|------|----------|----------------|----------------|----------------------------------------------------------------------------------|
| 0.77 | -0.20 | 0.97 | BC002792 | Data not found | RAB39B         | RAB39B, member RAS oncogene family                                               |
| 0.77 | 0.39  | 0.38 | BC009771 | Hs.279862      | BCCIP          | BRCA2 and CDKN1A interacting protein                                             |
| 0.77 | -0.37 | 1.14 | BC005336 | Hs.110853      |                | Homo sapiens, clone IMAGE:4152387, mRNA                                          |
| 0.77 | -1.41 | 2.19 | BC015542 | Hs.171844      | JKK            | STE20-like kinase                                                                |
| 0.77 | -0.04 | 0.81 | BC006315 | Hs.314956      | TSPAN-3        | tetraspan 3                                                                      |
| 0.77 | 0.48  | 0.29 | BC004256 | Hs.7165        | FLJ12827       | zinc finger protein 408                                                          |
| 0.77 | 0.65  | 0.12 | BC016288 | Hs.379557      | FLJ10719       | hypothetical protein FLJ10719                                                    |
| 0.77 | 0.43  | 0.34 | BC001225 | Hs.20815       | HPRP8BP        | U5 snRNP-specific 40 kDa protein (hPrp8-binding)                                 |
| 0.77 | 0.34  | 0.43 | BC006301 | Hs.7101        | PSMB3          | proteasome (prosome, macropain) subunit, beta type, 3                            |
| 0.77 | 0.63  | 0.14 | BC009116 | Hs.284141      | TRNT1          | tRNA nucleotidyl transferase, CCA-adding, 1                                      |
| 0.77 | -1.40 | 2.17 | BC002831 | Hs.280135      | EZH1           | enhancer of zeste homolog 1 (Drosophila)                                         |
| 0.77 | -0.21 | 0.98 | BC009969 | Hs.9805        | MRPS33         | mitochondrial ribosomal protein S33                                              |
| 0.77 | 0.30  | 0.47 | BC004346 | Hs.14927       | FAH            | fumarylacetoacetate hydrolase (fumarylacetoacetase)                              |
| 0.77 | -1.21 | 1.97 | BC017728 | Hs.8578        | NA 4-14-03 73  |                                                                                  |
| 0.77 | 0.07  | 0.70 | BC004157 | Hs.31895       | KIAA1630       | KIAA1630 protein                                                                 |
| 0.77 | -0.78 | 1.55 | BC007631 | Hs.11849       | CRIP1          | postsynaptic protein CRIP1                                                       |
| 0.77 | 0.16  | 0.60 | BC016844 | Hs.29106       | FLJ10759       | hypothetical protein FLJ10759                                                    |
| 0.77 | -1.16 | 1.93 | BC010493 | Hs.107381      | MGC16142       | hypothetical protein MGC16142                                                    |
| 0.77 | -0.61 | 1.38 | BC010409 | Hs.182265      |                | Homo sapiens, clone IMAGE:4877271, mRNA                                          |
| 0.76 | 0.63  | 0.13 | BC004140 | Hs.233950      | SPINT1         | serine protease inhibitor, Kunitz type 1                                         |
| 0.76 | -0.05 | 0.81 | BC000644 | Hs.276770      | MGC11271       | hypothetical protein MGC11271                                                    |
| 0.76 | -1.63 | 2.39 | BC010541 | Data not found | BLP2           | BBP-like protein 2                                                               |
| 0.76 | 0.20  | 0.56 | BC008054 | Hs.323193      | ARL6IP4        | ADP-ribosylation-like factor 6 interacting protein 4                             |
| 0.76 | 0.24  | 0.53 | BC014535 | Hs.44077       | PARVA          | parvin, alpha                                                                    |
| 0.76 | -0.64 | 1.40 | BC012620 | Hs.8868        | GOSR1          | golgi SNAP receptor complex member 1                                             |
| 0.76 | -0.20 | 0.96 | BC010061 | Hs.20558       | MAGEB1         | melanoma antigen, family B, 1                                                    |
| 0.76 | 0.12  | 0.64 | BC018361 | Hs.25887       | LOC113386      | similar to envelope protein                                                      |
| 0.76 | 0.44  | 0.32 | BC010397 | Data not found | LYPLA1         |                                                                                  |
| 0.76 | -0.52 | 1.28 | BC007405 | Hs.82240       | KPNB1          | karyopherin (importin) beta 1                                                    |
| 0.76 | 0.42  | 0.34 | BC010163 | Hs.303125      | HLA-DPB1       | major histocompatibility complex, class II, DP beta 1                            |
| 0.76 | 0.31  | 0.45 | BC019068 | Hs.413760      | APH-1A         | likely ortholog of C. elegans anterior pharynx defective 1A                      |
| 0.76 | -1.99 | 2.75 | BC002697 | Hs.21537       | LOC114928      | hypothetical protein BC013576                                                    |
| 0.76 | -0.20 | 0.96 | BC014659 | Hs.334514      | LENG4          | leukocyte receptor cluster (LRC) member 4                                        |
| 0.76 | 0.23  | 0.53 | BC016992 | Hs.143253      | FLJ13386       | hypothetical protein FLJ13386                                                    |
| 0.76 | 0.30  | 0.45 | BC001419 | Hs.19513       | FLJ12436       | hypothetical protein FLJ12436                                                    |
| 0.76 | -0.55 | 1.30 | BC000715 | Hs.236516      | TSHR           | thyroid stimulating hormone receptor                                             |
| 0.76 | -1.39 | 2.15 | BC004993 | Hs.300711      | TAF10          | TAF10 RNA polymerase II, TATA box binding protein (TBP)-associated factor, 30kDa |
| 0.75 | -0.14 | 0.89 | BC012351 | Hs.154029      | humNRDR        | dehydrogenase/reductase (SDR family) member 4                                    |
| 0.75 | 0.59  | 0.16 | BC015521 | Hs.171581      | C11orf24       | chromosome 11 open reading frame 24                                              |
| 0.75 | -0.99 | 1.74 | BC007874 | Hs.153636      | MGC20785       | hypothetical protein MGC20785                                                    |
| 0.75 | -0.40 | 1.15 | BC012138 | Hs.77269       | NICE-4         | NICE-4 protein                                                                   |
| 0.75 | -1.30 | 2.05 | BC011783 | Hs.101742      | RP42           | RP42 homolog                                                                     |
| 0.75 | -0.04 | 0.79 | BC001255 | Hs.240770      | APEX1          | APEX nuclease (multifunctional DNA repair enzyme) 1                              |
| 0.75 | -0.39 | 1.15 | BC013360 | Hs.356590      | NA 4-14-03 546 |                                                                                  |
| 0.75 | -0.56 | 1.32 | BC000556 | Hs.178011      | Rpo1-2         | similar to DNA-directed RNA polymerase I (135 kDa)                               |
| 0.75 | 0.10  | 0.65 | BC001396 | Hs.284250      | AD-003         | AD-003 protein                                                                   |
| 0.75 | -0.16 | 0.91 | BC008983 | Hs.8986        | APH-1A         | likely ortholog of C. elegans anterior pharynx defective 1A                      |
| 0.75 | 0.49  | 0.26 | BC005122 | Hs.13014       | S100A13        | S100 calcium binding protein A13                                                 |
| 0.75 | 0.28  | 0.47 | BC006410 | Hs.283739      | C1orf6         | chromosome 1 open reading frame 6                                                |
| 0.75 | 0.34  | 0.41 | BC001043 | Hs.15075       | DKFZP434E2216  | splicing factor 4                                                                |
| 0.75 | -0.25 | 1.00 | BC008827 | Hs.195041      | GTF2F1         | general transcription factor IIF, polypeptide 1, 74kDa                           |
| 0.75 | -0.11 | 0.86 | BC009727 | Hs.282990      | CDC42          | cell division cycle 42 (GTP binding protein, 25kDa)                              |
| 0.75 | 0.19  | 0.55 | BC021196 | Hs.13377       | AF053356_CDS3  | hypothetical protein AF053356_CDS3                                               |

|      |       |      |          |                      |                |                                                                                                                                     |
|------|-------|------|----------|----------------------|----------------|-------------------------------------------------------------------------------------------------------------------------------------|
| 0.75 | 0.22  | 0.52 | BC021161 | Hs.267527            | FLJ14668       | hypothetical protein FLJ14668                                                                                                       |
| 0.74 | 0.45  | 0.29 | BC001456 | Hs.173611            | NDUFS2         | NADH dehydrogenase (ubiquinone) Fe-S protein 2, 49kDa (NADH-coenzyme Q reductase)                                                   |
| 0.74 | 0.19  | 0.56 | BC021909 | Data not found       | JFC1           | NADPH oxidase-related, C2 domain-containing protein                                                                                 |
| 0.74 | -0.17 | 0.91 | BC005057 | Hs.278712            | TACSTD2        | tumor-associated calcium signal transducer 2                                                                                        |
| 0.74 | 0.63  | 0.12 | BC010488 | Hs.63168             | SSX2           |                                                                                                                                     |
| 0.74 | 0.53  | 0.21 | BC009219 | Hs.77039             | FLJ10986       | hypothetical protein FLJ10986                                                                                                       |
| 0.74 | 0.73  | 0.01 | BC007559 | Hs.283781            | TPI1           | triosephosphate isomerase 1                                                                                                         |
| 0.74 | 0.41  | 0.33 | BC021670 | Hs.430150            | TIP47          | cargo selection protein (mannose 6 phosphate receptor binding protein)                                                              |
| 0.74 | -0.80 | 1.54 | BC009819 | Hs.288158            | DDX27          | DEAD/H (Asp-Glu-Ala-Asp/His) box polypeptide 27                                                                                     |
| 0.74 | 0.16  | 0.58 | BC007782 | Hs.102950            | CAPN1          |                                                                                                                                     |
| 0.74 | -0.64 | 1.38 | BC007576 | Hs.4113              | NA 4-14-03 521 |                                                                                                                                     |
| 0.74 | -0.48 | 1.22 | BC000882 | Hs.75187             | TOMM20-PENDING | translocase of outer mitochondrial membrane 20 (yeast) homolog                                                                      |
| 0.74 | -0.05 | 0.79 | BC010187 | Hs.182740            | ID3            | inhibitor of DNA binding 3, dominant negative helix-loop-helix protein                                                              |
| 0.74 | -0.60 | 1.34 | BC010614 | Hs.285673            | GNPAT          | glyceronephosphate O-acyltransferase                                                                                                |
| 0.74 | -0.40 | 1.14 | BC000003 | Hs.127496            | ATP6V1G1       | ATPase, H <sup>+</sup> transporting, lysosomal 13kDa, V1 subunit G isoform 1                                                        |
| 0.74 | -0.21 | 0.95 | BC001038 | Data not found       | 76P            | gamma tubulin ring complex protein (76p gene)                                                                                       |
| 0.74 | 0.60  | 0.13 | BC007405 | Hs.82240             | STX3A          | syntaxin 3A                                                                                                                         |
| 0.74 | 0.22  | 0.51 | BC001155 | Hs.63525             | TPM3           |                                                                                                                                     |
| 0.74 | -0.20 | 0.94 | BC018142 | Hs.306227            | NA 4-14-03 97  |                                                                                                                                     |
| 0.74 | -0.96 | 1.69 | BC009110 | Hs.75730             | MGC12262       | hypothetical protein MGC12262                                                                                                       |
| 0.73 | -0.99 | 1.72 | BC012141 | In multiple clusters | MRPL39         | mitochondrial ribosomal protein L39                                                                                                 |
| 0.73 | 0.11  | 0.62 | BC009864 | Data not found       | FLJ13912       | hypothetical protein FLJ13912                                                                                                       |
| 0.73 | -0.13 | 0.86 | BC008015 | Hs.118638            | G1P3           | interferon, alpha-inducible protein (clone IFI-6-16)                                                                                |
| 0.73 | -0.24 | 0.98 | BC000457 | Hs.1575              | SNRPD3         | small nuclear ribonucleoprotein D3 polypeptide 18kDa                                                                                |
| 0.73 | -0.15 | 0.88 | BC000759 | Hs.24563             | NXT1           | NTF2-like export factor 1                                                                                                           |
| 0.73 | -0.30 | 1.04 | BC000465 | Hs.9701              | KIAA0014       | KIAA0014 gene product                                                                                                               |
| 0.73 | 0.01  | 0.72 | BC013114 | Hs.130712            | ARHC           | ras homolog gene family, member C                                                                                                   |
| 0.73 | -1.52 | 2.25 | BC002525 | Hs.62515             | KIAA0494       | KIAA0494 gene product                                                                                                               |
| 0.73 | -1.19 | 1.92 | BC002530 | Hs.399736            | CD44           | CD44 antigen (homing function and Indian blood group system)                                                                        |
| 0.73 | -0.42 | 1.15 | BC000516 | Hs.1276              | BN51T          | BN51 (BHK21) temperature sensitivity complementing                                                                                  |
| 0.73 | 0.56  | 0.17 | BC012136 | Hs.214397            | BAK1           | BCL2-antagonist/killer 1                                                                                                            |
| 0.73 | 0.23  | 0.51 | BC020515 | Hs.431584            | CLECSF2        | C-type (calcium dependent, carbohydrate-recognition domain) lectin, superfamily member 2 (activation-induced)                       |
| 0.73 | 0.45  | 0.28 | BC014259 | Hs.310640            | MRPS21         | mitochondrial ribosomal protein S21                                                                                                 |
| 0.73 | -0.26 | 0.99 | BC012612 | Hs.78056             | CTSL           | cathepsin L                                                                                                                         |
| 0.73 | 0.43  | 0.30 | BC009257 | Hs.59425             | NDUFA9         | NADH dehydrogenase (ubiquinone) 1 alpha subcomplex, 9, 39kDa                                                                        |
| 0.73 | 0.30  | 0.43 | BC012536 | Data not found       | NA 4-14-03 20  |                                                                                                                                     |
| 0.73 | -0.18 | 0.91 | BC001484 | Hs.75375             | SYNJ2BP        | synaptojanin 2 binding protein                                                                                                      |
| 0.73 | 0.24  | 0.48 | BC011046 | Hs.179600            | GDI1           | GDP dissociation inhibitor 1                                                                                                        |
| 0.73 | -1.54 | 2.27 | BC007633 | Hs.193053            | PVRL3          | poliovirus receptor-related 3                                                                                                       |
| 0.73 | 0.31  | 0.41 | BC001500 | Hs.75693             | ERCC3          | excision repair cross-complementing rodent repair deficiency, complementation group 3 (xeroderma pigmentosum group B complementing) |
| 0.73 | 0.55  | 0.17 | BC011907 | Data not found       | NA 4-14-03 90  |                                                                                                                                     |
| 0.72 | -0.73 | 1.45 | BC014019 | Hs.78713             | BFAR           | bifunctional apoptosis regulator                                                                                                    |
| 0.72 | 0.63  | 0.10 | BC015397 | Hs.122055            | NA 4-14-03 193 |                                                                                                                                     |
| 0.72 | 0.34  | 0.38 | BC009358 | Hs.18851             | NDST1          | N-deacetylase/N-sulfotransferase (heparan glucosaminyl) 1                                                                           |
| 0.72 | -0.31 | 1.03 | BC004896 | Hs.387358            | NONO           |                                                                                                                                     |
| 0.72 | -0.21 | 0.94 | BC002678 | Hs.110364            | NID67          | putative small membrane protein NID67                                                                                               |
| 0.72 | 0.59  | 0.13 | BC009317 | Hs.13222             | GPRK6          | G protein-coupled receptor kinase 6                                                                                                 |
| 0.72 | -0.29 | 1.01 | BC000442 | Hs.180655            |                |                                                                                                                                     |
| 0.72 | -1.16 | 1.88 | BC006172 | Hs.269914            | C12orf22       | chromosome 12 open reading frame 22                                                                                                 |
| 0.72 | -0.33 | 1.05 | BC001435 | Hs.247362            | DDAH2          | dimethylarginine dimethylaminohydrolase 2                                                                                           |
| 0.72 | 0.35  | 0.36 | BC011545 | Data not found       | ACY1           | aminoacylase 1                                                                                                                      |



|      |       |      |          |                |                |                                                                                     |
|------|-------|------|----------|----------------|----------------|-------------------------------------------------------------------------------------|
| 0.72 | -0.03 | 0.75 | BC003094 | Hs.12570       | LSM5           | LSM5 homolog, U6 small nuclear RNA associated (S. cerevisiae)                       |
| 0.72 | 0.31  | 0.41 | BC016613 | Hs.121190      | KIAA0303       | KIAA0303 protein                                                                    |
| 0.72 | 0.64  | 0.08 | BC001616 | Hs.81361       | HNRPAB         | heterogeneous nuclear ribonucleoprotein A/B                                         |
| 0.72 | -1.78 | 2.50 | BC003537 | Hs.409158      | TBPL1          | TBP-like 1                                                                          |
| 0.72 | 0.06  | 0.65 | BC016843 | Hs.351582      | NA 4-14-03 144 |                                                                                     |
| 0.72 | -2.11 | 2.82 | BC004240 | Hs.40403       | ALEX2          | armadillo repeat protein ALEX2                                                      |
| 0.72 | -0.14 | 0.85 | BC008692 | Hs.22868       | DXF68S1E       | family with sequence similarity 16, member A, X-linked                              |
| 0.71 | 0.00  | 0.72 | BC020494 | Data not found | MGC4171        | hypothetical protein MGC4171                                                        |
| 0.71 | 0.44  | 0.27 | BC012065 | Hs.24371       | ARF5           | ADP-ribosylation factor 5                                                           |
| 0.71 | -0.15 | 0.87 | BC010996 | Hs.23019       | MGC27466       | hypothetical protein MGC27466                                                       |
| 0.71 | 0.42  | 0.29 | BC007338 | Hs.283690      | MGC17515       | hypothetical protein MGC17515                                                       |
| 0.71 | 0.10  | 0.62 | BC000569 | Hs.284142      | MAX            | MAX protein                                                                         |
| 0.71 | 0.09  | 0.62 | BC013293 | Hs.76930       | CLN8           | ceroid-lipofuscinosis, neuronal 8 (epilepsy, progressive with mental retardation)   |
| 0.71 | 0.22  | 0.49 | BC003380 | Hs.71331       | LANPL          | leucine-rich acidic nuclear protein like                                            |
| 0.71 | 0.24  | 0.47 | BC001125 | Hs.394389      | PP1B           | peptidylprolyl isomerase B (cyclophilin B)                                          |
| 0.71 | 0.24  | 0.47 | BC017337 | Hs.286088      | NA 4-14-03 27  |                                                                                     |
| 0.71 | -0.61 | 1.32 | BC011897 | Hs.29169       | UROD           | uroporphyrinogen decarboxylase                                                      |
| 0.71 | -0.38 | 1.09 | BC012850 | Hs.13228       | DKFZP564B147   | DKFZP564B147 protein                                                                |
| 0.71 | 0.12  | 0.59 | BC009774 | Hs.91393       | LIN7C          | lin-7 homolog C (C. elegans)                                                        |
| 0.71 | 0.07  | 0.64 | BC001060 | Hs.73149       | PAX8           | paired box gene 8                                                                   |
| 0.71 | -0.49 | 1.20 | BC014973 | Hs.100448      | CFL1           | cofilin 1 (non-muscle)                                                              |
| 0.71 | -0.14 | 0.85 | BC017502 | Hs.2007        | CBCIP2         | CAP-binding protein complex interacting protein 2                                   |
| 0.71 | -0.76 | 1.47 | BC007334 | Hs.283532      | CBS            | cystathionine-beta-synthase                                                         |
| 0.71 | -0.38 | 1.08 | BC008884 | Hs.153937      | ISL2           | ISL2 transcription factor, LIM/homeodomain, (islet-2)                               |
| 0.71 | -1.52 | 2.22 | BC005200 | Hs.7870        | ARHGEF2        | rho/rac guanine nucleotide exchange factor (GEF) 2                                  |
| 0.71 | 0.68  | 0.03 | BC010357 | Hs.191381      | LOC51319       | hypothetical protein LOC51319                                                       |
| 0.70 | 0.41  | 0.30 | BC007637 | Hs.194610      | NPM1           | nucleophosmin (nucleolar phosphoprotein B23, numatrin)                              |
| 0.70 | 0.18  | 0.52 | BC007308 | Hs.389933      | CCNH           | cyclin H                                                                            |
| 0.70 | -0.25 | 0.95 | BC001382 | Hs.25450       | SLC29A1        | solute carrier family 29 (nucleoside transporters), member 1                        |
| 0.70 | -0.57 | 1.27 | BC001798 | Hs.284291      | UBE2C          | ubiquitin-conjugating enzyme E2C                                                    |
| 0.70 | 0.20  | 0.50 | BC020953 | Hs.180817      | COTL1          | coactosin-like 1 (Dictyostelium)                                                    |
| 0.70 | 0.43  | 0.27 | BC016996 | Hs.17211       | MGC19947       | core 1 UDP-galactose:N-acetylgalactosamine-alpha-R beta 1,3-galactosyltransferase 2 |
| 0.70 | -0.17 | 0.87 | BC003030 | Hs.79037       | HLA-DQB1       | major histocompatibility complex, class II, DQ beta 1                               |
| 0.70 | 0.54  | 0.16 | BC014129 | Hs.296398      | CRI1           | CREBBP/EP300 inhibitory protein 1                                                   |
| 0.70 | -0.29 | 0.99 | BC016949 | Hs.270956      | FXSD2          | FXSD domain containing ion transport regulator 2                                    |
| 0.70 | -0.39 | 1.09 | BC009530 | Data not found | FLJ20045       | hypothetical protein FLJ20045                                                       |
| 0.70 | -1.45 | 2.15 | BC014092 | Hs.300463      | FLJ20625       | hypothetical protein FLJ20625                                                       |
| 0.70 | 0.24  | 0.46 | BC014460 | Hs.100764      | 384D8-2        | hypothetical protein 384D8_6                                                        |
| 0.70 | -0.25 | 0.94 | BC005965 | Data not found | MRPL34         | mitochondrial ribosomal protein L34                                                 |
| 0.70 | -0.75 | 1.45 | BC001107 | Hs.3530        | HBB            | hemoglobin, beta                                                                    |
| 0.70 | -0.13 | 0.83 | BC002551 | Hs.30114       | GRCC8          | likely ortholog of mouse gene rich cluster, C8 gene                                 |
| 0.70 | -0.33 | 1.03 | BC010175 | Hs.379466      | PB1            | polybromo 1                                                                         |
| 0.70 | -0.26 | 0.96 | BC013289 | Hs.19520       | NGLY1          | N-glycanase 1                                                                       |
| 0.70 | -0.82 | 1.51 | BC001248 | Hs.26090       | FLJ20272       | hypothetical protein FLJ20272                                                       |
| 0.70 | -0.26 | 0.95 | BC015164 | Hs.408943      | HNRPAB         | heterogeneous nuclear ribonucleoprotein A/B                                         |
| 0.70 | -1.02 | 1.71 | BC010365 | Hs.32356       | FLJ20628       | hypothetical protein FLJ20628                                                       |
| 0.69 | -0.42 | 1.11 | BC001708 | Hs.77039       | NA 4-14-03 26  |                                                                                     |
| 0.69 | 0.62  | 0.07 | BC003618 | Hs.40342       | HRIHFB2122     | Tara-like protein                                                                   |
| 0.69 | 0.37  | 0.33 | BC013357 | Hs.15470       | HCK            | hemopoietic cell kinase                                                             |
| 0.69 | 0.08  | 0.62 | BC006494 | Hs.79110       | CGI-41         | CGI-41 protein                                                                      |
| 0.69 | -0.34 | 1.03 | BC011781 | Hs.22164       | DKFZP434B168   | DKFZP434B168 protein                                                                |
| 0.69 | 0.24  | 0.45 | BC000658 | Hs.155223      | G6PT1          | glucose-6-phosphatase, transport (glucose-6-phosphate) protein 1                    |
| 0.69 | 0.63  | 0.06 | BC012075 | Hs.85570       | MGC3413        | hypothetical protein MGC3413                                                        |

|      |       |      |          |                |                |                                                                                           |
|------|-------|------|----------|----------------|----------------|-------------------------------------------------------------------------------------------|
| 0.69 | -0.53 | 1.22 | BC008640 | Hs.167927      | KCNN4          | potassium intermediate/small conductance calcium-activated channel, subfamily N, member 4 |
| 0.69 | 0.02  | 0.67 | BC004445 | Hs.288800      | CCNF           | cyclin F                                                                                  |
| 0.69 | -0.31 | 1.00 | BC014445 | Hs.325650      | GAGED3         | G antigen, family D, 3                                                                    |
| 0.69 | -0.52 | 1.21 | BC015886 | Hs.271277      | GRLF1          | glucocorticoid receptor DNA binding factor 1                                              |
| 0.69 | -0.74 | 1.43 | BC000564 | Hs.25817       | DKFZP564L2423  | hypothetical protein DKFZp564L2423                                                        |
| 0.69 | 0.46  | 0.22 | BC010576 | Hs.3005        | SNRPD3         | small nuclear ribonucleoprotein D3 polypeptide 18kDa                                      |
| 0.69 | -2.13 | 2.82 | BC006199 | Hs.182579      | HIG1           | likely ortholog of mouse hypoxia induced gene 1                                           |
| 0.69 | -0.80 | 1.48 | BC000396 | Hs.75355       | AMOTL2         | angiomotin like 2                                                                         |
| 0.68 | 0.42  | 0.27 | BC008716 | Hs.75562       | KIAA0738       | KIAA0738 gene product                                                                     |
| 0.68 | -0.80 | 1.49 | BC014950 | Hs.63287       | LOC151568      | hypothetical protein BC009491                                                             |
| 0.68 | -0.81 | 1.49 | BC010183 | Hs.110445      | LAMP2          | lysosomal-associated membrane protein 2                                                   |
| 0.68 | 0.20  | 0.48 | BC001044 | Hs.67991       | POLR2L         | polymerase (RNA) II (DNA directed) polypeptide L, 7.6kDa                                  |
| 0.68 | 0.05  | 0.63 | BC003355 | Hs.11669       | LAMA5          | laminin, alpha 5                                                                          |
| 0.68 | -0.93 | 1.61 | BC009712 | Hs.76781       | KRT14          | keratin 14 (epidermolysis bullosa simplex, Dowling-Meara, Koebner)                        |
| 0.68 | 0.01  | 0.68 | BC015394 | Hs.44131       | HSD-3.1        | spermatogenesis associated 7                                                              |
| 0.68 | -0.02 | 0.71 | BC014010 | Hs.10101       | ATP5G1         | ATP synthase, H+ transporting, mitochondrial F0 complex, subunit c (subunit 9), isoform 1 |
| 0.68 | 0.31  | 0.38 | BC002737 | Hs.433827      | FLJ12681       | hypothetical protein FLJ12681                                                             |
| 0.68 | -0.30 | 0.98 | BC005024 | Hs.16089       | FOXO3A         |                                                                                           |
| 0.68 | 0.01  | 0.68 | BC003621 | Hs.103804      | HNRPU          | heterogeneous nuclear ribonucleoprotein U (scaffold attachment factor A)                  |
| 0.68 | -0.18 | 0.86 | BC000916 | Hs.74637       | TEGT           | testis enhanced gene transcript (BAX inhibitor 1)                                         |
| 0.68 | -2.32 | 3.00 | BC010042 | Hs.91579       | RAF1           | v-raf-1 murine leukemia viral oncogene homolog 1                                          |
| 0.68 | 0.24  | 0.44 | BC001271 | Hs.8867        | CYR61          | cysteine-rich, angiogenic inducer, 61                                                     |
| 0.68 | -0.31 | 0.99 | BC008784 | Hs.111279      | FLJ10404       | hypothetical protein FLJ10404                                                             |
| 0.68 | -0.47 | 1.15 | BC003067 | Hs.76556       | CD68           | CD68 antigen                                                                              |
| 0.68 | 0.35  | 0.33 | BC000487 | Hs.296380      | FLJ23119       | hypothetical protein FLJ23119                                                             |
| 0.68 | -0.16 | 0.84 | BC013867 | Hs.194431      | XRN2           | 5'-3' exoribonuclease 2                                                                   |
| 0.68 | -0.10 | 0.78 | BC013425 | Hs.42251       | HSPC009        | HSPC009 protein                                                                           |
| 0.68 | -0.48 | 1.16 | BC016715 | Hs.430150      | MGC15875       | hypothetical protein MGC15875                                                             |
| 0.68 | 0.20  | 0.48 | BC014146 | Hs.28298       | FLJ13102       | dehydrodolichyl diphosphate synthase                                                      |
| 0.68 | -0.03 | 0.71 | BC000082 | Hs.111801      | HEXB           | hexosaminidase B (beta polypeptide)                                                       |
| 0.68 | 0.64  | 0.04 | BC015484 | Hs.106857      | XRCC4          | X-ray repair complementing defective repair in Chinese hamster cells 4                    |
| 0.68 | -0.12 | 0.80 | BC016292 | Hs.93002       | MGC10765       | hypothetical protein MGC10765                                                             |
| 0.68 | 0.30  | 0.38 | BC000142 | Hs.77171       | MCM5           | MCM5 minichromosome maintenance deficient 5, cell division cycle 46 (S. cerevisiae)       |
| 0.68 | -1.28 | 1.96 | BC013408 | Hs.149997      | NAB2           | NGFI-A binding protein 2 (EGR1 binding protein 2)                                         |
| 0.68 | -0.37 | 1.04 | BC018151 | Hs.356019      | CDA11          | CDA11 protein                                                                             |
| 0.68 | 0.07  | 0.60 | BC019313 | Hs.172330      | MGC2705        | hypothetical protein MGC2705                                                              |
| 0.67 | -0.54 | 1.21 | BC009580 | Hs.168669      | OGDH           | oxoglutarate (alpha-ketoglutarate) dehydrogenase (lipoamide)                              |
| 0.67 | -0.68 | 1.36 | BC018466 | Hs.325530      | MAP2K2         | mitogen-activated protein kinase kinase 2                                                 |
| 0.67 | 0.08  | 0.60 | BC001411 | Hs.272630      | APOL2          | apolipoprotein L, 2                                                                       |
| 0.67 | -0.24 | 0.92 | BC001194 | Hs.336780      | SPTLC1         | serine palmitoyltransferase, long chain base subunit 1                                    |
| 0.67 | 0.11  | 0.56 | BC004176 | Hs.29173       | SSH-3          | slingshot 3                                                                               |
| 0.67 | -1.97 | 2.64 | BC013966 | Hs.86211       | TMEM9          | transmembrane protein 9                                                                   |
| 0.67 | -0.20 | 0.87 | BC000651 | Hs.104637      | MRPL9          | mitochondrial ribosomal protein L9                                                        |
| 0.67 | -0.37 | 1.05 | BC001463 | Hs.24220       | SCOTIN         | scotin                                                                                    |
| 0.67 | 0.66  | 0.01 | BC008188 | Hs.10958       | DJ-1           | Parkinson disease (autosomal recessive, early onset) 7                                    |
| 0.67 | -0.89 | 1.57 | BC007656 | Hs.93002       | SNX6           | sorting nexin 6                                                                           |
| 0.67 | -0.55 | 1.23 | BC001801 | Data not found | AF1Q           | ALL1-fused gene from chromosome 1q                                                        |
| 0.67 | 0.48  | 0.19 | BC001149 | Hs.271926      | NA 4-14-03 411 |                                                                                           |
| 0.67 | -0.14 | 0.81 | BC003155 | Hs.10326       | ITCH           | itchy homolog E3 ubiquitin protein ligase (mouse)                                         |
| 0.67 | -0.64 | 1.32 | BC001519 | Hs.286192      | RARRES2        | retinoic acid receptor responder (tazarotene induced) 2                                   |
| 0.67 | 0.48  | 0.19 | BC000586 | Hs.285306      | MED6           | mediator of RNA polymerase II transcription, subunit 6 homolog (yeast)                    |
| 0.67 | 0.30  | 0.37 | BC013291 | Hs.21431       | BCL2L12        | BCL2-like 12 (proline rich)                                                               |
| 0.67 | -0.17 | 0.84 | BC014068 | Hs.154196      | SSRP1          | structure specific recognition protein 1                                                  |

|      |       |      |          |                      |                |                                                                                   |
|------|-------|------|----------|----------------------|----------------|-----------------------------------------------------------------------------------|
| 0.67 | 0.31  | 0.36 | BC015015 | Hs.272838            | MGC10771       | hypothetical protein MGC10771                                                     |
| 0.67 | -0.05 | 0.72 | BC015316 | Hs.337078            | YR-29          | hypothetical protein YR-29                                                        |
| 0.67 | 0.58  | 0.09 | BC005202 | Hs.380421            | PPIL4          | peptidylprolyl isomerase (cyclophilin)-like 4                                     |
| 0.67 | 0.38  | 0.29 | BC000533 | Hs.4835              | EIF3S8         | eukaryotic translation initiation factor 3, subunit 8, 110kDa                     |
| 0.67 | -0.23 | 0.90 | BC016617 | Hs.432714            | SSR2           | signal sequence receptor, beta (translocon-associated protein beta)               |
| 0.67 | -0.44 | 1.11 | BC017217 | Hs.46458             | DCTN1          | dynactin 1 (p150, glued homolog, Drosophila)                                      |
| 0.67 | -1.14 | 1.81 | BC014050 | Hs.300876            | PDCD7          | programmed cell death 7                                                           |
| 0.67 | 0.11  | 0.56 | BC000939 | Hs.355888            | PLCB2          | phospholipase C, beta 2                                                           |
| 0.67 | -0.18 | 0.85 | BC002532 | Hs.433222            | PSME2          | proteasome (prosome, macropain) activator subunit 2 (PA28 beta)                   |
| 0.67 | 0.29  | 0.37 | BC014878 | Hs.274430            | NOSIP          | nitric oxide synthase interacting protein                                         |
| 0.67 | -0.03 | 0.70 | BC017712 | Hs.693               | NA 4-14-03 194 |                                                                                   |
| 0.67 | 0.46  | 0.21 | BC000266 | Hs.74823             | KLK5           | kallikrein 5                                                                      |
| 0.67 | 0.54  | 0.13 | BC004188 | Hs.251653            | TUBB2          | tubulin, beta, 2                                                                  |
| 0.67 | -0.26 | 0.92 | BC001011 | Hs.172865            | CSTF1          | cleavage stimulation factor, 3' pre-RNA, subunit 1, 50kDa                         |
| 0.67 | 0.03  | 0.64 | BC011580 | Data not found       | CDT6           | angiopoietin-like factor                                                          |
| 0.67 | 0.15  | 0.51 | BC007737 | Hs.69285             | CDK5RAP3       | CDK5 regulatory subunit associated protein 3                                      |
| 0.67 | -0.93 | 1.60 | BC010048 | Hs.153768            | CLIPR-59       | CLIP-170-related protein                                                          |
| 0.66 | -0.29 | 0.96 | BC000725 | Hs.99899             | GRIPAP1        | GRIP1 associated protein 1                                                        |
| 0.66 | -1.81 | 2.48 | BC005356 | Hs.433404            | LOC113655      | hypothetical protein BC011982                                                     |
| 0.66 | -1.50 | 2.16 | BC012596 | Hs.323342            | ARPC4          | actin related protein 2/3 complex, subunit 4, 20kDa                               |
| 0.66 | -1.15 | 1.82 | BC002632 | Hs.386741            | EMP2           | epithelial membrane protein 2                                                     |
| 0.66 | 0.02  | 0.64 | BC001731 | Hs.278672            | C15orf15       | chromosome 15 open reading frame 15                                               |
| 0.66 | -0.06 | 0.73 | BC001540 | Hs.279832            | CPSF6          | cleavage and polyadenylation specific factor 6, 68kDa                             |
| 0.66 | 0.40  | 0.26 | BC002507 | Hs.12142             | WDR13          | WD repeat domain 13                                                               |
| 0.66 | 0.04  | 0.62 | BC012205 | Hs.107139            | FLJ11149       | hypothetical protein FLJ11149                                                     |
| 0.66 | -0.71 | 1.37 | BC010545 | Hs.60300             | GNAS           | GNAS complex locus                                                                |
| 0.66 | 0.32  | 0.34 | BC008226 | Hs.336898            | PPP2CB         | protein phosphatase 2 (formerly 2A), catalytic subunit, beta isoform              |
| 0.66 | 0.31  | 0.35 | BC011057 | Hs.24835             | NIPSNAP1       | nipsnap homolog 1 (C. elegans)                                                    |
| 0.66 | 0.29  | 0.37 | BC015891 | Hs.279704            | SSX2           |                                                                                   |
| 0.66 | -0.06 | 0.72 | BC008727 | In multiple clusters | RARA           |                                                                                   |
| 0.66 | 0.34  | 0.31 | BC010881 | Hs.84045             | FLJ13154       | hypothetical protein FLJ13154                                                     |
| 0.66 | -1.75 | 2.40 | BC012149 | Hs.426460            | DKFZP564C186   | DKFZP564C186 protein                                                              |
| 0.66 | -0.53 | 1.18 | BC014414 | Hs.187378            | PAI-RBP1       | PAI-1 mRNA-binding protein                                                        |
| 0.66 | 0.20  | 0.45 | BC000482 | Hs.26002             | LDB1           | LIM domain binding 1                                                              |
| 0.65 | -0.31 | 0.96 | BC004144 | Hs.9850              | MGC1842        | hypothetical protein MGC1842                                                      |
| 0.65 | 0.26  | 0.39 | BC008868 | Hs.173611            | CSTB           | cystatin B (stefin B)                                                             |
| 0.65 | -1.67 | 2.33 | BC006510 | Hs.23960             | GRWD           | glutamate rich WD repeat protein GRWD                                             |
| 0.65 | 0.09  | 0.56 | BC008929 | Hs.78305             | CTSH           | cathepsin H                                                                       |
| 0.65 | -0.14 | 0.79 | BC008770 | Hs.6527              | HSPC216        | hypothetical protein HSPC216                                                      |
| 0.65 | 0.22  | 0.43 | BC000413 | Hs.192023            | STK3           | serine/threonine kinase 3 (STE20 homolog, yeast)                                  |
| 0.65 | -0.18 | 0.84 | BC001043 | Hs.15075             | DKFZP434E2216  | splicing factor 4                                                                 |
| 0.65 | -0.42 | 1.07 | BC007070 | Hs.410016            | EVIN1          | epidermodysplasia verruciformis 1                                                 |
| 0.65 | 0.30  | 0.35 | BC001450 | Hs.89563             | NCBP1          | nuclear cap binding protein subunit 1, 80kDa                                      |
| 0.65 | -1.59 | 2.25 | BC011819 | Hs.380774            | KIAA1327       | KIAA1327 protein                                                                  |
| 0.65 | 0.43  | 0.22 | BC000824 | Hs.1384              | MGMT           | O-6-methylguanine-DNA methyltransferase                                           |
| 0.65 | 0.53  | 0.12 | BC016513 | Hs.26204             | RPS27L         | ribosomal protein S27-like                                                        |
| 0.65 | 0.41  | 0.24 | BC000327 | Hs.6780              | FLJ14154       | hypothetical protein FLJ14154                                                     |
| 0.65 | 0.40  | 0.25 | BC000045 | Hs.9030              | IFIT1          | interferon-induced protein with tetratricopeptide repeats 1                       |
| 0.65 | -0.10 | 0.74 | BC005252 | Hs.55498             | MAL2           | mal, T-cell differentiation protein 2                                             |
| 0.65 | 0.21  | 0.44 | BC019270 | Hs.260024            | AICDA          | activation-induced cytidine deaminase                                             |
| 0.65 | 0.23  | 0.42 | BC007565 | Hs.75648             | STMN1          | stathmin 1/oncoprotein 18                                                         |
| 0.65 | 0.63  | 0.02 | BC008900 | Hs.288679            | C20orf60       | chromosome 20 open reading frame 60                                               |
| 0.65 | 0.15  | 0.49 | BC017094 | Hs.130829            | NCF1           | neutrophil cytosolic factor 1 (47kDa, chronic granulomatous disease, autosomal 1) |

|          |       |      |           |                |               |                                                                                         |
|----------|-------|------|-----------|----------------|---------------|-----------------------------------------------------------------------------------------|
| 0.65     | 0.31  | 0.33 | BC007219  | Hs.180638      | MGC22825      | hypothetical protein MGC22825                                                           |
| 0.65     | -0.18 | 0.83 | BC011906  | Hs.9908        | DJ465N24.2.1  | hypothetical protein DJ465N24.2.1                                                       |
| 0.64     | 0.10  | 0.54 | BC008019  | Hs.1708        | TRIM16        | tripartite motif-containing 16                                                          |
| 0.64     | -0.95 | 1.59 | BC001101  | Hs.119503      | L3MBTL2       | l(3)mbt-like 2 (Drosophila)                                                             |
| 0.64     | -0.01 | 0.65 | BC001021  | Hs.94576       | MGC11256      | hypothetical protein MGC11256                                                           |
| 0.64     | 0.07  | 0.58 | BC012189  | Hs.324127      |               |                                                                                         |
| 0.64     | 0.14  | 0.50 | BC006175  | Hs.78465       | GPR30         | G protein-coupled receptor 30                                                           |
| 0.64     | -0.64 | 1.28 | BC000193  | Hs.22199       | FLJ12687      | hypothetical protein FLJ12687                                                           |
| 0.64     | -0.35 | 0.99 | BC012088  | Hs.89657       | ANXA5         | annexin A5                                                                              |
| 0.64     | 0.59  | 0.05 | BC007866  | Hs.122655      | DKFZP586D0824 | immunity associated protein 2                                                           |
| 0.64     | 0.35  | 0.29 | BC000124  | Hs.283844      | FLJ10535      | pyridoxine-5'-phosphate oxidase                                                         |
| 0.64     | 0.33  | 0.31 | BC000185  | Hs.259785      | Di-Ras2       | DIRAS family, GTP-binding RAS-like 2                                                    |
| 0.64     | 0.36  | 0.28 | BC016836  | Hs.8185        | MMS19L        | MMS19-like (MET18 homolog, S. cerevisiae)                                               |
| 0.64     | 0.41  | 0.23 | BC007037  | Hs.82401       | MGC4677       | hypothetical protein MGC4677                                                            |
| 0.64     | -0.66 | 1.30 | BC003170  | Hs.8127        | GNAI2         | guanine nucleotide binding protein (G protein), alpha inhibiting activity polypeptide 2 |
| 0.64     | -0.23 | 0.86 | BC014653  | Hs.286         | PLK           | polo-like kinase (Drosophila)                                                           |
| 0.64     | 0.18  | 0.46 | BC022091  | Hs.44070       | MGAT2         | mannosyl (alpha-1,6-)-glycoprotein beta-1,2-N-acetylglucosaminyltransferase             |
| 0.64     | -1.80 | 2.43 | BC001139  | Hs.380413      | FLJ21939      | hypothetical protein FLJ21939 similar to 5-azacytidine induced gene 2                   |
| 0.64     | -0.94 | 1.57 | BC005966  | Hs.173048      | SNX5          | sorting nexin 5                                                                         |
| 0.64     | -0.48 | 1.12 | BC006337  | Hs.119591      | KIAA0116      | KIAA0116 protein                                                                        |
| 0.64     | -0.05 | 0.68 | BC013907  | Data not found | RBSK          | ribokinase                                                                              |
| 0.63     | -0.95 | 1.58 | BC000121  | Hs.72132       | YAP           | YY1 associated protein                                                                  |
| 0.63     | 0.28  | 0.36 | NM_152561 | Hs.11607       | LILRA2        | leukocyte immunoglobulin-like receptor, subfamily A (with TM domain), member 2          |
| 0.63     | -0.36 | 0.99 | BC001889  | Hs.7181        | KIAA0370      | exportin 6                                                                              |
| 0.63     | -0.13 | 0.76 | BF343213  | Hs.350552      | FLJ22875      | hypothetical protein FLJ22875                                                           |
| 0.63     | 0.17  | 0.46 | BC010030  | Hs.303666      | LOC51193      | zinc finger protein ANC_2H01                                                            |
| 0.63     | -0.36 | 0.99 | BC000128  | Hs.15725       | IER5          | immediate early response 5                                                              |
| 0.63     | 0.15  | 0.48 | BC014327  | Hs.12150       | MGC14353      | hypothetical protein MGC14353                                                           |
| 0.63     | 0.52  | 0.11 | BC010492  | Hs.7019        | N4WBP5        | Nedd4 family interacting protein 1                                                      |
| 0.63     | 0.35  | 0.29 | BC011636  | Hs.25127       | NA 4-14-03 80 |                                                                                         |
| 0.63     | 0.19  | 0.44 | BC004226  | Hs.6454        | MRPL40        | mitochondrial ribosomal protein L40                                                     |
| 0.63     | -1.52 | 2.15 | BC014494  | Hs.352252      | ARHGEF5       | Rho guanine nucleotide exchange factor (GEF) 5                                          |
| 0.63     | -0.54 | 1.17 | BC005951  | Hs.153261      | SEC61B        | protein translocation complex beta                                                      |
| 0.63     | -0.15 | 0.78 | BC008039  | Hs.5464        | MGC861        | hypothetical protein MGC861                                                             |
| 0.63     | 0.54  | 0.09 | BC009446  | Hs.6166        | TH1L          | TH1-like (Drosophila)                                                                   |
| 0.63     | 0.15  | 0.48 | BC008383  | Hs.181289      | ATF4          | activating transcription factor 4 (tax-responsive enhancer element B67)                 |
| 0.63     | 0.59  | 0.04 | BC014026  | Hs.180455      | CDK5          | cyclin-dependent kinase 5                                                               |
| 0.63     | 0.28  | 0.35 | BC010041  | Hs.12084       | FLJ22955      | hypothetical protein FLJ22955                                                           |
| 0.63     | 0.50  | 0.13 | BC013905  | Data not found | TTL1          | tubulin tyrosine ligase-like 1                                                          |
| 0.63     | -1.15 | 1.78 | BC002412  | Hs.78504       | IMMT          | inner membrane protein, mitochondrial (mitofilin)                                       |
| 0.63     | -0.71 | 1.33 | BC001388  | Hs.217493      | ANXA2         | annexin A2                                                                              |
| 0.63     | -1.42 | 2.05 | BC009489  | Hs.65377       | MTF1          | metal-regulatory transcription factor 1                                                 |
| 0.62     | 0.54  | 0.08 | BC012887  | Hs.279905      | KRTHA3B       | keratin, hair, acidic, 3B                                                               |
| 0.62     | -0.78 | 1.40 | BC002326  | Hs.324178      | MAPKAP1       | mitogen-activated protein kinase associated protein 1                                   |
| 0.62     | 0.00  | 0.62 | BC006249  | Hs.3764        | COVA1         | cytosolic ovarian carcinoma antigen 1                                                   |
| 0.62     | 0.35  | 0.27 | BC009190  | Hs.333823      | PLSCR3        | phospholipid scramblase 3                                                               |
| 0.62     | 0.06  | 0.57 | BC004875  | Hs.66309       | HMP19         | HMP19 protein                                                                           |
| 0.62     | 0.52  | 0.11 | BC004179  | Hs.326560      | MGC2780       | hypothetical protein MGC2780                                                            |
| 0.62     | 0.19  | 0.43 | BC000881  | Hs.1594        | CENPA         | centromere protein A, 17kDa                                                             |
| 0.62     | -0.79 | 1.41 | BC006108  | Hs.55014       | RAN           | RAN, member RAS oncogene family                                                         |
| 0.62     | 0.54  | 0.08 | BC007953  | Hs.332381      | MGC12518      | similar to ZINC FINGER PROTEIN 257 (BONE MARROW ZINC FINGER 4)                          |
| (BMZF-4) |       |      |           |                |               |                                                                                         |
| 0.62     | -0.47 | 1.09 | BC008325  | Hs.379091      | FLJ22002      | hypothetical protein FLJ22002                                                           |

|      |       |      |          |                      |                |                                                                                        |
|------|-------|------|----------|----------------------|----------------|----------------------------------------------------------------------------------------|
| 0.62 | 0.06  | 0.56 | BC004471 | Hs.74120             | MMP2           | matrix metalloproteinase 2 (gelatinase A, 72kDa gelatinase, 72kDa type IV collagenase) |
| 0.62 | 0.25  | 0.37 | BC007348 | Hs.77573             | DKFZp434N0650  | hypothetical protein DKFZp434N0650                                                     |
| 0.62 | 0.44  | 0.18 | BC004292 | Hs.9729              | NXF2           | nuclear RNA export factor 2                                                            |
| 0.62 | -0.60 | 1.22 | BC002637 | Hs.155418            | PLAU           | plasminogen activator, urokinase                                                       |
| 0.62 | -0.40 | 1.02 | BC000427 | Hs.84285             | FLJ20516       | hypothetical protein FLJ20516                                                          |
| 0.62 | -0.14 | 0.76 | BC015547 | Hs.9597              | PAIP1          | polyadenylate binding protein-interacting protein 1                                    |
| 0.62 | -0.78 | 1.40 | BC008069 | Hs.281648            |                |                                                                                        |
| 0.62 | 0.58  | 0.04 | BC016727 | Hs.82829             | VPS4A          | vacuolar protein sorting 4A (yeast)                                                    |
| 0.62 | -1.78 | 2.40 | BC008348 | Hs.42287             | MGC23280       | hypothetical protein MGC23280                                                          |
| 0.62 | -0.32 | 0.93 | BC014908 | Hs.75257             | LOC51128       | GTP-binding protein Sara                                                               |
| 0.62 | -0.43 | 1.04 | BC014021 | Hs.91813             | VAMP8          | vesicle-associated membrane protein 8 (endobrevin)                                     |
| 0.61 | -0.60 | 1.21 | BC011764 | Hs.301266            | CYB5           | cytochrome b-5                                                                         |
| 0.61 | -1.62 | 2.23 | BC005322 | Hs.433989            | FLJ21080       | hypothetical protein FLJ21080                                                          |
| 0.61 | -0.90 | 1.52 | BC011359 | Hs.418650            | SDF2           | stromal cell-derived factor 2                                                          |
| 0.61 | 0.40  | 0.21 | BC015797 | Hs.285829            | S100A2         | S100 calcium binding protein A2                                                        |
| 0.61 | 0.45  | 0.16 | BC008741 | Hs.154103            | RCV1           | recoverin                                                                              |
| 0.61 | -0.48 | 1.09 | BC002939 | Hs.93121             | TUBG1          | tubulin, gamma 1                                                                       |
| 0.61 | 0.23  | 0.39 | BC016851 | Hs.375023            | NA 4-14-03 120 |                                                                                        |
| 0.61 | -2.46 | 3.08 | BC016054 | Hs.23467             | C20orf158      | chromosome 20 open reading frame 158                                                   |
| 0.61 | -0.90 | 1.51 | BC007297 | Hs.10824             | CHEK1          | CHK1 checkpoint homolog (S. pombe)                                                     |
| 0.61 | 0.08  | 0.53 | BC007391 | Hs.381200            | ORF1-FL49      | putative nuclear protein ORF1-FL49                                                     |
| 0.61 | -0.07 | 0.67 | BC015616 | Hs.289271            | JUNB           | jun B proto-oncogene                                                                   |
| 0.61 | -0.82 | 1.42 | BC000844 | Hs.76095             | IER3           | immediate early response 3                                                             |
| 0.61 | -0.33 | 0.94 | BC002823 | Hs.7446              | NCKAP1         | NCK-associated protein 1                                                               |
| 0.61 | -1.03 | 1.64 | BC007641 | Hs.17126             | NA 4-14-03 22  |                                                                                        |
| 0.61 | -1.30 | 1.91 | BC012560 | Hs.380887            | MRPS10         | mitochondrial ribosomal protein S10                                                    |
| 0.61 | -1.23 | 1.84 | BC011537 | Data not found       | KPNA1          | karyopherin alpha 1 (importin alpha 5)                                                 |
| 0.61 | -0.93 | 1.54 | BC010088 | Hs.89545             | NA 4-14-03 89  |                                                                                        |
| 0.60 | 0.49  | 0.12 | BC006309 | Hs.78768             | F23149_1       | hypothetical protein F23149_1                                                          |
| 0.60 | -0.04 | 0.65 | BC013047 | Hs.322456            | FKBP14         | FK506 binding protein 14, 22 kDa                                                       |
| 0.60 | 0.12  | 0.49 | BC017572 | Hs.21201             | EIF2C2         | eukaryotic translation initiation factor 2C, 2                                         |
| 0.60 | -1.96 | 2.56 | BC001507 | Hs.334360            | FLJ21827       | hypothetical protein FLJ21827                                                          |
| 0.60 | -1.46 | 2.06 | BC003525 | Hs.42712             | WSB2           | likely ortholog of mouse WD-40-repeat-containing protein with a SOCS box 2             |
| 0.60 | 0.28  | 0.32 | BC000627 | Hs.321677            | SLC25A19       | solute carrier family 25 (mitochondrial deoxynucleotide carrier), member 19            |
| 0.60 | -0.62 | 1.22 | BC016984 | Hs.11065             | ZD52F10        | hypothetical gene ZD52F10                                                              |
| 0.60 | -0.42 | 1.02 | BC015921 | Hs.396266            | IGHM           | immunoglobulin heavy constant mu                                                       |
| 0.60 | 0.50  | 0.10 | BC009842 | Hs.323664            | MGC29643       | hypothetical protein MGC29643                                                          |
| 0.60 | -0.81 | 1.41 | BC000619 | Hs.21635             | MCLC           | Mid-1-related chloride channel 1                                                       |
| 0.60 | -0.81 | 1.41 | BC006234 | Hs.7788              | NPD007         | NPD007 protein                                                                         |
| 0.60 | 0.09  | 0.51 | BC014431 | In multiple clusters | FLJ11151       | hypothetical protein FLJ11151                                                          |
| 0.60 | -0.30 | 0.90 | BC004548 | In multiple clusters | GRINL1A        | glutamate receptor, ionotropic, N-methyl D-aspartate-like 1A                           |
| 0.60 | -1.21 | 1.81 | BC001782 | Hs.322852            | EFG2           | mitochondrial elongation factor G2                                                     |
| 0.60 | 0.11  | 0.49 | BC015619 | Hs.126783            | DKFZP434A0131  | DKFZp434A0131 protein                                                                  |
| 0.60 | -1.17 | 1.77 | BC009804 | Hs.7179              | RAD1           | RAD1 homolog (S. pombe)                                                                |
| 0.60 | -0.47 | 1.07 | AK096655 | Hs.6983              | ATP6V0C        | ATPase, H+ transporting, lysosomal 16kDa, V0 subunit c                                 |
| 0.60 | -0.08 | 0.68 | BC011403 | Hs.24969             | PRKAB1         | protein kinase, AMP-activated, beta 1 non-catalytic subunit                            |
| 0.60 | 0.19  | 0.41 | BC009427 | Hs.380843            | PRO2013        | hypothetical protein PRO2013                                                           |
| 0.60 | -0.08 | 0.68 | BC012340 | Hs.24792             | ARL4           | ADP-ribosylation factor-like 4                                                         |
| 0.60 | -0.59 | 1.19 | BC011952 | Hs.406737            | APOA1          | apolipoprotein A-I                                                                     |
| 0.60 | 0.01  | 0.58 | BC009074 | Hs.118821            | RGNEF          | hypothetical protein FLJ21817 similar to Rhoip2                                        |
| 0.60 | -0.36 | 0.96 | BC004505 | Hs.18627             | BTBD2          | BTB (POZ) domain containing 2                                                          |
| 0.60 | 0.23  | 0.37 | BC003663 | Hs.9877              | NUP62          | nucleoporin 62kDa                                                                      |
| 0.60 | -0.86 | 1.45 | BC009468 | Hs.84153             | MGC2306        | hypothetical protein MGC2306                                                           |

|      |       |      |          |                |                |                                                                                     |
|------|-------|------|----------|----------------|----------------|-------------------------------------------------------------------------------------|
| 0.59 | 0.01  | 0.59 | BC018896 | Hs.80598       | MGC13057       | hypothetical protein MGC13057                                                       |
| 0.59 | 0.34  | 0.26 | BC008316 | Hs.10824       | SEP15          | 15 kDa selenoprotein                                                                |
| 0.59 | 0.32  | 0.27 | BC000898 | Hs.79026       | MLF2           | myeloid leukemia factor 2                                                           |
| 0.59 | 0.45  | 0.14 | BC008921 | Data not found | SEMA3B         | sema domain, immunoglobulin domain (Ig), short basic domain, secreted, (semaphorin) |
| 3B   |       |      |          |                |                |                                                                                     |
| 0.59 | -0.97 | 1.57 | BC012087 | Hs.6682        | MGC4400        | hypothetical protein MGC4400                                                        |
| 0.59 | 0.06  | 0.53 | BC008487 | Hs.99960       | SLC7A7         | solute carrier family 7 (cationic amino acid transporter, y+ system), member 7      |
| 0.59 | 0.53  | 0.07 | BC014580 | Hs.12102       |                |                                                                                     |
| 0.59 | 0.30  | 0.30 | BC000374 | Hs.409634      | LOC51064       | glutathione S-transferase subunit 13 homolog                                        |
| 0.59 | 0.05  | 0.54 | BC003565 | Data not found | ASB13          | ankyrin repeat and SOCS box-containing 13                                           |
| 0.59 | -0.41 | 1.01 | BC017054 | Hs.154672      | HSPC155        | hypothetical protein HSPC155                                                        |
| 0.59 | 0.43  | 0.16 | BC007830 | Hs.4877        | ARSA           | arylsulfatase A                                                                     |
| 0.59 | 0.19  | 0.40 | BC001308 | Hs.279905      | ANKT           | nucleolar protein ANKT                                                              |
| 0.59 | -0.32 | 0.91 | BC000250 | Hs.81687       | PPT1           | palmitoyl-protein thioesterase 1 (ceroid-lipofuscinosis, neuronal 1, infantile)     |
| 0.59 | 0.04  | 0.55 | BC010435 | Data not found | LOC89941       | mitochondrial Rho 2                                                                 |
| 0.59 | -0.19 | 0.78 | BC021195 | Hs.73893       | MGC13098       | hypothetical protein MGC13098                                                       |
| 0.59 | -1.00 | 1.59 | BC012728 | Data not found | FLJ12770       | hypothetical protein FLJ12770                                                       |
| 0.59 | 0.18  | 0.41 | BC002716 | Hs.5472        | HDAC11         | histone deacetylase 11                                                              |
| 0.59 | -0.37 | 0.96 | BC015052 | Hs.83419       | H2BFB          | histone 1, H2bd                                                                     |
| 0.59 | -0.62 | 1.21 | BC005870 | Hs.334626      | MGC4238        | hypothetical protein MGC4238                                                        |
| 0.59 | -0.40 | 0.98 | BC012187 | Hs.192375      | TERA           | TERA protein                                                                        |
| 0.59 | 0.33  | 0.26 | BC013432 | Hs.7535        | LOC55871       | COBW-like protein                                                                   |
| 0.59 | -0.05 | 0.64 | BC012265 | Hs.180370      | EIF1AY         | eukaryotic translation initiation factor 1A, Y chromosome                           |
| 0.59 | 0.34  | 0.25 | BC001822 | Hs.29656       | PITPNB         | phosphatidylinositol transfer protein, beta                                         |
| 0.59 | -0.29 | 0.88 | BC020507 | Hs.71746       | NA 4-14-03 140 |                                                                                     |
| 0.59 | -0.15 | 0.73 | BC007964 | Hs.66052       | PPIA           | peptidylprolyl isomerase A (cyclophilin A)                                          |
| 0.58 | -0.42 | 1.01 | BC011634 | Hs.113207      | JUN            | v-jun sarcoma virus 17 oncogene homolog (avian)                                     |
| 0.58 | 0.50  | 0.08 | BC004462 | Hs.180780      | LOC112885      | hypothetical protein BC012187                                                       |
| 0.58 | -0.36 | 0.94 | BC007606 | Hs.1578        | MANBAL         | mannosidase, beta A, lysosomal-like                                                 |
| 0.58 | 0.04  | 0.54 | BC013374 | Data not found | IGLJ3          | immunoglobulin lambda joining 3                                                     |
| 0.58 | 0.25  | 0.33 | BC013956 | Data not found | RRM2           | ribonucleotide reductase M2 polypeptide                                             |
| 0.58 | -0.96 | 1.54 | BC015480 | Hs.343748      | PREB           | prolactin regulatory element binding                                                |
| 0.58 | -0.80 | 1.39 | BC001416 | Hs.2903        | FLJ11560       | hypothetical protein FLJ11560                                                       |
| 0.58 | -0.88 | 1.46 | BC002668 | Hs.15250       | PRKCSH         | protein kinase C substrate 80K-H                                                    |
| 0.58 | -0.99 | 1.57 | BC006401 | Hs.58831       | C20orf45       | chromosome 20 open reading frame 45                                                 |
| 0.58 | 0.52  | 0.06 | BC004269 | Hs.18449       | SRP            | stresscopin-related peptide                                                         |
| 0.58 | -0.03 | 0.61 | BC006390 | Hs.172195      | SFXN2          | sideroflexin 2                                                                      |
| 0.58 | -1.11 | 1.68 | BC011562 | Hs.77617       | ATP6V1E1       | ATPase, H+ transporting, lysosomal 31kDa, V1 subunit E isoform 1                    |
| 0.58 | -0.05 | 0.62 | BC004134 | Hs.333257      | AVIL           | advillin                                                                            |
| 0.58 | 0.57  | 0.01 | BC020548 | Hs.101766      | NMB            | neuromedin B                                                                        |
| 0.58 | -0.13 | 0.70 | BC000638 | Data not found | NRLN1          | likely ortholog of mouse neuralin 1                                                 |
| 0.58 | -0.69 | 1.27 | BC007803 | Hs.273357      | KEAP1          | Kelch-like ECH-associated protein 1                                                 |
| 0.58 | -0.40 | 0.97 | BC015096 | Hs.12622       | CALM2          | calmodulin 2 (phosphorylase kinase, delta)                                          |
| 0.57 | -0.99 | 1.56 | BC005362 | Hs.194695      | MGC10765       | hypothetical protein MGC10765                                                       |
| 0.57 | -1.68 | 2.26 | BC017314 | Hs.18063       | RPLP0          | ribosomal protein, large, P0                                                        |
| 0.57 | -5.39 | 5.97 | BC007100 | Hs.406720      | ATF5           | activating transcription factor 5                                                   |
| 0.57 | 0.46  | 0.12 | BC000380 | Hs.110757      | TIMM13         | translocase of inner mitochondrial membrane 13 homolog (yeast)                      |
| 0.57 | -2.52 | 3.09 | BC015924 | Hs.37482       | THG-1          | TSC-22-like                                                                         |
| 0.57 | -1.19 | 1.76 | BC006280 | Hs.176067      | MGC11386       | hypothetical protein MGC11386                                                       |
| 0.57 | -0.21 | 0.78 | BC012161 | Hs.388456      | PSMD2          | proteasome (prosome, macropain) 26S subunit, non-ATPase, 2                          |
| 0.57 | 0.37  | 0.20 | BC021257 | Hs.79411       | FLJ22501       | Hermansky-Pudlak syndrome-6 protein                                                 |
| 0.57 | -1.22 | 1.79 | BC013082 | Hs.20191       | FLJ12886       | hypothetical protein FLJ12886                                                       |
| 0.57 | 0.46  | 0.11 | BC001706 | Hs.109773      | ACO2           | aconitase 2, mitochondrial                                                          |

|      |       |      |          |                |                |                                                                                                                                      |
|------|-------|------|----------|----------------|----------------|--------------------------------------------------------------------------------------------------------------------------------------|
| 0.57 | -0.06 | 0.63 | BC012455 | Hs.62275       | C15orf15       | chromosome 15 open reading frame 15                                                                                                  |
| 0.57 | 0.48  | 0.08 | BC011671 | Hs.155090      | PAX6           | paired box gene 6 (aniridia, keratitis)                                                                                              |
| 0.57 | 0.21  | 0.36 | BC008466 | Hs.5085        | R3HDM          | R3H domain (binds single-stranded nucleic acids) containing                                                                          |
| 0.57 | -1.33 | 1.90 | BC009882 | Hs.20084       | IRAK1          | interleukin-1 receptor-associated kinase 1                                                                                           |
| 0.57 | -1.00 | 1.57 | BC011741 | Hs.74376       | RNASE4         | ribonuclease, RNase A family, 4                                                                                                      |
| 0.57 | -0.39 | 0.95 | BC000464 | Hs.21753       | VPS45A         | vacuolar protein sorting 45A (yeast)                                                                                                 |
| 0.57 | 0.00  | 0.57 | BC019087 | Hs.267566      | MGC16703       | alpha tubulin-like                                                                                                                   |
| 0.57 | -0.58 | 1.15 | BC014766 | Hs.7771        | RPA40          | RNA polymerase I subunit                                                                                                             |
| 0.57 | 0.08  | 0.48 | BC009480 | Hs.9950        | ECH1           | enoyl Coenzyme A hydratase 1, peroxisomal                                                                                            |
| 0.57 | -0.36 | 0.92 | BC009355 | Hs.6294        | S100A3         | S100 calcium binding protein A3                                                                                                      |
| 0.57 | 0.44  | 0.13 | BC012166 | Hs.283667      | MGC4399        | mitochondrial carrier protein                                                                                                        |
| 0.56 | 0.35  | 0.21 | BC002560 | Hs.157237      | DNMT3L         | DNA (cytosine-5-)-methyltransferase 3-like                                                                                           |
| 0.56 | -0.06 | 0.62 | BC005918 | Hs.425790      | VILL           | villin-like                                                                                                                          |
| 0.56 | 0.51  | 0.05 | BC007615 | Hs.298262      | ST7            | suppression of tumorigenicity                                                                                                        |
| 0.56 | -0.16 | 0.72 | BC016699 | Hs.134846      | ARMET          | arginine-rich, mutated in early stage tumors                                                                                         |
| 0.56 | -0.36 | 0.92 | BC010385 | Hs.966         | COIL           | coilin                                                                                                                               |
| 0.56 | 0.33  | 0.23 | BC000680 | Hs.266935      | CBFA2T1        | core-binding factor, runt domain, alpha subunit 2; translocated to, 1; cyclin D-related                                              |
| 0.56 | -0.28 | 0.85 | BC002440 | Hs.218842      | CCNB1          | cyclin B1                                                                                                                            |
| 0.56 | -0.11 | 0.67 | BC009903 | Hs.115232      | SARS           | seryl-tRNA synthetase                                                                                                                |
| 0.56 | 0.48  | 0.08 | BC008011 | Hs.111779      | PGRMC2         | progesterone receptor membrane component 2                                                                                           |
| 0.56 | 0.24  | 0.32 | BC007872 | Hs.105097      | FLJ14466       | hypothetical protein FLJ14466                                                                                                        |
| 0.56 | -0.36 | 0.92 | BC014654 | Hs.195464      | GPAA1          | GPAA1P anchor attachment protein 1 homolog (yeast)                                                                                   |
| 0.56 | -0.42 | 0.98 | BC015650 | Hs.132760      | MPST           | mercaptopyruvate sulfurtransferase                                                                                                   |
| 0.56 | 0.51  | 0.05 | BC011392 | Hs.3833        | USP11          | ubiquitin specific protease 11                                                                                                       |
| 0.56 | -0.17 | 0.73 | BC003508 | Hs.248267      | EIF4A2         | eukaryotic translation initiation factor 4A, isoform 2                                                                               |
| 0.56 | -0.07 | 0.63 | BC000722 | Hs.118721      | FLJ20150       | hypothetical protein FLJ20150                                                                                                        |
| 0.56 | -0.64 | 1.20 | BC010518 | Data not found | MACF1          | microtubule-actin crosslinking factor 1                                                                                              |
| 0.56 | 0.09  | 0.47 | BC012812 | Hs.235390      | FLJ12895       | hypothetical protein FLJ12895                                                                                                        |
| 0.56 | 0.09  | 0.47 | BC013568 | Hs.26994       | H11            | protein kinase H11                                                                                                                   |
| 0.56 | 0.14  | 0.41 | BC001668 | Hs.31439       | SPINT2         | serine protease inhibitor, Kunitz type, 2                                                                                            |
| 0.56 | -1.74 | 2.29 | BC015473 | Data not found | MRE11A         | MRE11 meiotic recombination 11 homolog A (S. cerevisiae)                                                                             |
| 0.55 | 0.45  | 0.10 | BC009681 | Hs.315463      | TOMM70A        | translocase of outer mitochondrial membrane 70 homolog A (yeast)                                                                     |
| 0.55 | 0.22  | 0.34 | BC001013 | Hs.102696      | MGC10715       | novel C2H2 type zinc finger protein                                                                                                  |
| 0.55 | 0.06  | 0.49 | BC010018 | Hs.172673      | SB52           | glucosamine-6-phosphate isomerase                                                                                                    |
| 0.55 | 0.10  | 0.45 | BC010696 | Hs.32978       | MRPL12         | mitochondrial ribosomal protein L12                                                                                                  |
| 0.55 | -0.26 | 0.81 | BC007510 | Hs.119503      | EIF3S61P       | eukaryotic translation initiation factor 3, subunit 6 interacting protein                                                            |
| 0.55 | -1.28 | 1.83 | AK096306 | Hs.300383      | SSNA1          | Sjogren's syndrome nuclear autoantigen 1                                                                                             |
| 0.55 | -0.60 | 1.15 | BC009708 | Hs.409634      |                |                                                                                                                                      |
| 0.55 | -0.37 | 0.93 | BC001095 | Hs.118244      | PRPF4          | PRP4 pre-mRNA processing factor 4 homolog (yeast)                                                                                    |
| 0.55 | 0.04  | 0.51 | BC017367 | Hs.91566       | NDP52          | nuclear domain 10 protein                                                                                                            |
| 0.55 | -0.03 | 0.58 | BC014980 | Hs.129548      | WAS            | Wiskott-Aldrich syndrome (eczema-thrombocytopenia)                                                                                   |
| 0.55 | -0.78 | 1.33 | BC013916 | Hs.71618       | E2-230K        | likely ortholog of mouse ubiquitin-conjugating enzyme E2-230K                                                                        |
| 0.55 | -0.74 | 1.30 | BC011988 | Hs.1244        | ZBPB           | zona pellucida binding protein                                                                                                       |
| 0.55 | -0.25 | 0.80 | BC009780 | Hs.195614      | SF3B3          | splicing factor 3b, subunit 3, 130kDa                                                                                                |
| 0.55 | -0.17 | 0.73 | BC007817 | Hs.159309      | HADHB          | hydroxyacyl-Coenzyme A dehydrogenase/3-ketoacyl-Coenzyme A thiolase/enoyl-Coenzyme A hydratase (trifunctional protein), beta subunit |
| 0.55 | -0.51 | 1.06 | BC003643 | Hs.225160      | AP4B1          | adaptor-related protein complex 4, beta 1 subunit                                                                                    |
| 0.55 | -1.46 | 2.01 | BC018163 | Hs.348024      | P2RY6          | pyrimidineric receptor P2Y, G-protein coupled, 6                                                                                     |
| 0.55 | 0.52  | 0.03 | BC003102 | Hs.19561       | NA 4-14-03 490 |                                                                                                                                      |
| 0.55 | -0.83 | 1.38 | BC021989 | Hs.79428       | KRT19          | keratin 19                                                                                                                           |
| 0.55 | -0.08 | 0.63 | BC012531 | Hs.227933      | ALG5           | Alg5, S. cerevisiae, homolog of                                                                                                      |
| 0.55 | 0.19  | 0.36 | BC017081 | Hs.351484      | AWP1           | protein associated with PRK1                                                                                                         |
| 0.55 | 0.50  | 0.05 | BC014039 | Hs.184339      | WBCSR5         | Williams-Beuren syndrome chromosome region 5                                                                                         |

|      |       |      |           |                      |                |                                                                               |
|------|-------|------|-----------|----------------------|----------------|-------------------------------------------------------------------------------|
| 0.55 | 0.22  | 0.33 | BC003033  | Hs.301342            | RAD51L3        | RAD51-like 3 (S. cerevisiae)                                                  |
| 0.55 | -0.82 | 1.37 | BC008305  | Hs.289080            | NA 4-14-03 100 |                                                                               |
| 0.55 | -1.31 | 1.86 | BC008966  | Hs.173739            | GNRPX          | likely ortholog of mouse guanine nucleotide releasing protein x               |
| 0.55 | 0.10  | 0.45 | BC004386  | Hs.79768             | PIGT           | phosphatidyl inositol glycan class T                                          |
| 0.55 | -0.09 | 0.64 | BC000978  | Data not found       | FLJ20259       |                                                                               |
| 0.55 | 0.54  | 0.01 | BC001950  | Hs.7101              | ANAPC5         | anaphase promoting complex subunit 5                                          |
| 0.55 | 0.38  | 0.16 | BC008687  | Hs.248149            | DKFZP434D146   | DKFZP434D146 protein                                                          |
| 0.55 | 0.02  | 0.52 | BC000521  | Hs.118400            | DKFZP434H132   | DKFZP434H132 protein                                                          |
| 0.54 | 0.00  | 0.54 | BC007024  | Hs.201967            | LOC153516      | hypothetical protein BC010563                                                 |
| 0.54 | -1.12 | 1.66 | BC021241  | Hs.32952             | RAGD           | Rag D protein                                                                 |
| 0.54 | -1.75 | 2.29 | BC008298  | Hs.183253            | PHEMX          | pan-hematopoietic expression                                                  |
| 0.54 | -1.21 | 1.76 | BC003046  | Hs.63304             | NA 4-14-03 489 |                                                                               |
| 0.54 | -0.61 | 1.15 | BC016155  | In multiple clusters | MGC11303       | hypothetical protein MGC11303 similar to Zink transporter 2                   |
| 0.54 | 0.49  | 0.06 | BC002902  | Hs.90297             | DKFZP586O0120  | DKFZP586O0120 protein                                                         |
| 0.54 | -2.68 | 3.23 | BC016737  | Hs.248267            | MYBL2          | v-myb myeloblastosis viral oncogene homolog (avian)-like 2                    |
| 0.54 | -0.31 | 0.85 | NM_153611 | Hs.22546             | MAGEA4         | melanoma antigen, family A, 4                                                 |
| 0.54 | -0.39 | 0.93 | BC020523  | Hs.48604             | LOC85026       | AD038                                                                         |
| 0.54 | 0.00  | 0.54 | BC001936  | Hs.41714             | SLC25A3        | solute carrier family 25 (mitochondrial carrier; phosphate carrier), member 3 |
| 0.54 | 0.18  | 0.36 | BC009841  | Hs.182215            | FLJ23322       | hypothetical protein FLJ23322                                                 |
| 0.54 | -0.11 | 0.65 | BC021965  | Hs.8526              | MGC3262        | hypothetical protein MGC3262                                                  |
| 0.54 | 0.03  | 0.51 | BC011564  | Hs.268490            | CDKN1A         | cyclin-dependent kinase inhibitor 1A (p21, Cip1)                              |
| 0.54 | 0.12  | 0.42 | BC002894  | Hs.28029             | MGC3062        | likely ortholog of mouse phosducin-like 2                                     |
| 0.54 | 0.47  | 0.07 | BC007720  | Hs.121482            | HSPCB          | heat shock 90kDa protein 1, beta                                              |
| 0.54 | -0.26 | 0.80 | BC010636  | Hs.79194             | LAPTM4A        | lysosomal-associated protein transmembrane 4 alpha                            |
| 0.54 | 0.25  | 0.29 | BC002485  | Hs.4992              | MGC2848        | hypothetical protein MGC2848                                                  |
| 0.54 | -0.58 | 1.12 | BC012117  | Hs.23557             | HTR3A          | 5-hydroxytryptamine (serotonin) receptor 3A                                   |
| 0.54 | 0.09  | 0.44 | BC000314  | Hs.99947             | RTN1           | reticulon 1                                                                   |
| 0.54 | 0.02  | 0.52 | BC007026  | Hs.1955              | CENPH          | centromere protein H                                                          |
| 0.54 | -0.62 | 1.16 | BC009714  | Hs.24970             | NA 4-14-03 306 |                                                                               |
| 0.54 | -0.70 | 1.24 | BC005934  | Hs.288106            | ASMT           | acetylserotonin O-methyltransferase                                           |
| 0.54 | 0.13  | 0.41 | BC009998  | Hs.283722            | IDH1           | isocitrate dehydrogenase 1 (NADP+), soluble                                   |
| 0.54 | -2.79 | 3.32 | BC000343  | Hs.211594            | FLJ12428       | hypothetical protein FLJ12428                                                 |
| 0.54 | -0.17 | 0.70 | BC007305  | Hs.83190             | FLJ20130       | hypothetical protein FLJ20130                                                 |
| 0.54 | -0.02 | 0.56 | BC010659  | Hs.15830             | MGC4701        | hypothetical protein MGC4701                                                  |
| 0.54 | 0.34  | 0.19 | BM906317  | Hs.55336             | FLJ14346       | hypothetical protein FLJ14346                                                 |
| 0.53 | -0.59 | 1.12 | BC008918  | Hs.89474             | UCC1           | upregulated in colorectal cancer gene 1                                       |
| 0.53 | 0.43  | 0.11 | BC009228  | Data not found       | MGC27171       | hypothetical protein MGC27171                                                 |
| 0.53 | 0.49  | 0.04 | BC010632  | Hs.54617             | BAT1           | HLA-B associated transcript 1                                                 |
| 0.53 | 0.20  | 0.33 | BC010892  | Hs.279836            | HSPC166        | HSPC166 protein                                                               |
| 0.53 | 0.29  | 0.24 | BC000112  | Hs.179817            | VPS18          | vacuolar protein sorting protein 18                                           |
| 0.53 | -2.06 | 2.59 | BC005907  | Data not found       | NAGA           | N-acetylgalactosaminidase, alpha-                                             |
| 0.53 | 0.15  | 0.38 | BC009229  | Hs.9100              | SERPINB4       | serine (or cysteine) proteinase inhibitor, clade B (ovalbumin), member 4      |
| 0.53 | -0.30 | 0.83 | BC012362  | Hs.239527            | NA 4-14-03 28  |                                                                               |
| 0.53 | -0.86 | 1.39 | BC011905  | Hs.17936             | RFP2           | ret finger protein 2                                                          |
| 0.53 | 0.12  | 0.41 | BC017247  | Hs.118962            | TCOF1          | Treacher Collins-Franceschetti syndrome 1                                     |
| 0.53 | 0.47  | 0.06 | BC007080  | Hs.273077            | MGC2477        | hypothetical protein MGC2477                                                  |
| 0.53 | 0.27  | 0.26 | BC016856  | Hs.166173            | EEF1E1         | eukaryotic translation elongation factor 1 epsilon 1                          |
| 0.53 | -1.62 | 2.15 | BC007667  | Hs.63489             | GAS7           | growth arrest-specific 7                                                      |
| 0.53 | -0.04 | 0.57 | BC015946  | Hs.418650            | IGFBP6         | insulin-like growth factor binding protein 6                                  |
| 0.53 | 0.37  | 0.16 | BC006238  | Hs.37936             | SUV39H1        | suppressor of variegation 3-9 homolog 1 (Drosophila)                          |
| 0.53 | 0.02  | 0.51 | BC000688  | Hs.300631            | TNRC5          | trinucleotide repeat containing 5                                             |
| 0.53 | 0.02  | 0.51 | BC000368  | Hs.392837            | LOC51290       | CDA14                                                                         |
| 0.53 | 0.17  | 0.36 | BC002662  | Hs.22777             | LOC219738      | hypothetical protein BC013587                                                 |



|      |       |      |          |                |                |                                                                                               |
|------|-------|------|----------|----------------|----------------|-----------------------------------------------------------------------------------------------|
| 0.53 | -0.01 | 0.54 | BC001712 | Hs.182625      | DPP3           | dipeptidylpeptidase 3                                                                         |
| 0.53 | -0.24 | 0.77 | BC004536 | Hs.333120      | CDV-1          | carnitine deficiency-associated gene expressed in ventricle 1                                 |
| 0.53 | -0.41 | 0.94 | BC013899 | Hs.153640      | NA 4-14-03 555 |                                                                                               |
| 0.53 | -0.09 | 0.61 | BC001274 | Hs.59498       | CDC2L5         | cell division cycle 2-like 5 (cholinesterase-related cell division controller)                |
| 0.53 | 0.42  | 0.11 | BC017486 | Hs.89545       | BHD            | folliculin                                                                                    |
| 0.53 | -0.01 | 0.54 | BC004187 | Hs.47649       | MCCC1          | methylcrotonoyl-Coenzyme A carboxylase 1 (alpha)                                              |
| 0.53 | 0.00  | 0.53 | BC015239 | Hs.129837      | RNASEH2A       | ribonuclease H2, large subunit                                                                |
| 0.53 | 0.50  | 0.03 | BC006508 | Hs.184877      | SLC25A11       | solute carrier family 25 (mitochondrial carrier; oxoglutarate carrier), member 11             |
| 0.53 | -2.51 | 3.04 | BC009867 | Hs.406511      | ETS1           | v-ets erythroblastosis virus E26 oncogene homolog 1 (avian)                                   |
| 0.53 | 0.20  | 0.32 | BC008656 | Hs.177011      | DNAJC9         | DnaJ (Hsp40) homolog, subfamily C, member 9                                                   |
| 0.52 | -0.02 | 0.55 | BC003684 | Hs.79187       | CXADR          | coxsackie virus and adenovirus receptor                                                       |
| 0.52 | -0.91 | 1.44 | BC014252 | Hs.124010      | DKFZp586C1924  | hypothetical protein DKFZp586C1924                                                            |
| 0.52 | -1.20 | 1.72 | BC013682 | Hs.37034       | TNFRSF21       | tumor necrosis factor receptor superfamily, member 21                                         |
| 0.52 | -0.65 | 1.17 | BC014438 | Hs.172035      | FLJ14431       | hypothetical protein FLJ14431                                                                 |
| 0.52 | -0.07 | 0.59 | BC015329 | Hs.169330      | FLJ11016       | hypothetical protein FLJ11016                                                                 |
| 0.52 | -0.20 | 0.72 | BC017558 | Hs.180877      | SLC25A3        | solute carrier family 25 (mitochondrial carrier; phosphate carrier), member 3                 |
| 0.52 | -1.08 | 1.60 | BC013687 | Hs.421654      | UQCRB          | ubiquinol-cytochrome c reductase binding protein                                              |
| 0.52 | -1.02 | 1.54 | BC009607 | Hs.169248      | HCS            | cytochrome c, somatic                                                                         |
| 0.52 | -0.61 | 1.13 | BC000062 | Hs.183556      | MDM2           | Mdm2, transformed 3T3 cell double minute 2, p53 binding protein (mouse)                       |
| 0.52 | -0.42 | 0.94 | BC010389 | Hs.351622      | PDX1           | E3-binding protein                                                                            |
| 0.52 | 0.21  | 0.31 | BC003660 | Data not found | NA 4-14-03 139 |                                                                                               |
| 0.52 | 0.28  | 0.24 | BC009758 | Hs.166254      | PCDHGC3        | protocadherin gamma subfamily C, 3                                                            |
| 0.52 | 0.38  | 0.14 | BC016040 | Hs.120996      | PAFAH1B3       | platelet-activating factor acetylhydrolase, isoform Ib, gamma subunit 29kDa                   |
| 0.52 | 0.37  | 0.15 | BC002947 | Hs.73769       | RPL8           | ribosomal protein L8                                                                          |
| 0.52 | 0.01  | 0.51 | BC001420 | Hs.109706      | PTDSS1         | phosphatidylserine synthase 1                                                                 |
| 0.52 | -0.95 | 1.47 | BC007049 | Hs.78944       | NA 4-14-03 148 |                                                                                               |
| 0.52 | -0.50 | 1.02 | BC009582 | Hs.169248      | HCS            | cytochrome c, somatic                                                                         |
| 0.52 | 0.44  | 0.08 | BC003698 | Hs.64211       | MGC5601        | hypothetical protein MGC5601                                                                  |
| 0.52 | -0.12 | 0.63 | BC001848 | Hs.70582       | MGC2835        | DEAD box helicase 97 kDa                                                                      |
| 0.52 | -0.85 | 1.36 | BC001501 | Hs.82932       | MGC11316       |                                                                                               |
| 0.52 | -2.12 | 2.64 | BC007458 | Hs.288193      | ZDHHC3         | zinc finger, DHHC domain containing 3                                                         |
| 0.52 | 0.13  | 0.39 | BC006479 | Hs.108847      | MGC2749        | hypothetical protein MGC2749                                                                  |
| 0.52 | 0.12  | 0.40 | BC007797 | Hs.21907       | ELMO2          | engulfment and cell motility 2 (ced-12 homolog, C. elegans)                                   |
| 0.52 | 0.17  | 0.34 | BC006818 | Hs.240534      | AGPAT1         | 1-acylglycerol-3-phosphate O-acyltransferase 1 (lysophosphatidic acid acyltransferase, alpha) |
| 0.52 | -0.16 | 0.68 | BC006425 | Hs.337251      | IL1RN          | interleukin 1 receptor antagonist                                                             |
| 0.51 | -1.17 | 1.69 | BC009894 | Hs.274230      | FLJ10634       | hypothetical protein FLJ10634                                                                 |
| 0.51 | -0.29 | 0.80 | BC008404 | Hs.811         | COQ7           | coenzyme Q7 homolog, ubiquinone (yeast)                                                       |
| 0.51 | -0.39 | 0.91 | BC016866 | Hs.91096       | CRIPT          | postsynaptic protein CRIPT                                                                    |
| 0.51 | 0.18  | 0.34 | BC000840 | Hs.155482      | HAGH           | hydroxyacyl glutathione hydrolase                                                             |
| 0.51 | -0.19 | 0.70 | BC009808 | Hs.277721      | FLJ10493       | hypothetical protein FLJ10493                                                                 |
| 0.51 | -2.55 | 3.06 | BC004913 | Hs.9629        | PDE9A          | phosphodiesterase 9A                                                                          |
| 0.51 | -0.07 | 0.58 | BC004494 | Hs.32018       | PSMC2          | proteasome (prosome, macropain) 26S subunit, ATPase, 2                                        |
| 0.51 | -1.37 | 1.88 | BC004324 | Hs.397609      | TYROBP         | TYRO protein tyrosine kinase binding protein                                                  |
| 0.51 | 0.02  | 0.49 | BC000693 | Hs.153961      | WBSCR20A       | Williams Beuren syndrome chromosome region 20A                                                |
| 0.51 | -1.66 | 2.17 | BC004468 | Hs.40834       | MGC3038        | hypothetical protein similar to actin related protein 2/3 complex, subunit 5                  |
| 0.51 | 0.24  | 0.27 | BC003545 | Hs.236510      | MINA53         | myc-induced nuclear antigen, 53 kDa                                                           |
| 0.51 | 0.33  | 0.18 | BC008783 | Hs.247478      | BAT4           | HLA-B associated transcript 4                                                                 |
| 0.51 | 0.01  | 0.50 | BC004565 | Hs.247812      | CD7            | CD7 antigen (p41)                                                                             |
| 0.51 | 0.14  | 0.37 | BC001660 | Hs.8297        | RNASE6PL       | ribonuclease 6 precursor                                                                      |
| 0.51 | 0.28  | 0.23 | BC013979 | Hs.77719       | PCCB           | propionyl Coenzyme A carboxylase, beta polypeptide                                            |
| 0.51 | -0.36 | 0.87 | BC001915 | Hs.5105        | KRT18          | keratin 18                                                                                    |
| 0.51 | -0.95 | 1.45 | BC002765 | Hs.279784      | FLJ20445       | hypothetical protein FLJ20445                                                                 |

|      |       |      |                |                |               |                                                                                                              |
|------|-------|------|----------------|----------------|---------------|--------------------------------------------------------------------------------------------------------------|
| 0.51 | -0.56 | 1.06 | BC009873       | Hs.334712      | CGI-150       | CGI-150 protein                                                                                              |
| 0.51 | -0.40 | 0.91 | BC009015       | Hs.183583      | ILF2          | interleukin enhancer binding factor 2, 45kDa                                                                 |
| 0.51 | 0.27  | 0.24 | BC000117       | Hs.105435      | DAD1          | defender against cell death 1                                                                                |
| 0.51 | 0.12  | 0.38 | BC007628       | Hs.182265      | BNIP3         | BCL2/adenovirus E1B 19kDa interacting protein 3                                                              |
| 0.51 | 0.35  | 0.16 | BC015536       | Hs.118944      | LOC51659      | HSPC037 protein                                                                                              |
| 0.51 | -0.84 | 1.35 | BC009524       | Hs.178761      | CCRK          | cell cycle related kinase                                                                                    |
| 0.51 | 0.20  | 0.31 | BC003110       | Hs.64310       | C20orf7       | chromosome 20 open reading frame 7                                                                           |
| 0.51 | 0.34  | 0.17 | BC009031       | Hs.155182      | GOT1          | glutamic-oxaloacetic transaminase 1, soluble (aspartate aminotransferase 1)                                  |
| 0.51 | -0.23 | 0.74 | BC010145       | Data not found | ZNF297        | zinc finger protein 297                                                                                      |
| 0.51 | 0.13  | 0.38 | BC005134       | Hs.235422      | PEX10         | peroxisome biogenesis factor 10                                                                              |
| 0.51 | -1.04 | 1.55 | BC010014       | Hs.26516       | PSMD10        | proteasome (prosome, macropain) 26S subunit, non-ATPase, 10                                                  |
| 0.51 | 0.49  | 0.02 | BC008145       | Hs.73722       | NOL4          | nucleolar protein 4                                                                                          |
| 0.51 | -0.26 | 0.77 | BC020969       | Data not found | NDUFA6        | NADH dehydrogenase (ubiquinone) 1 alpha subcomplex, 6, 14kDa                                                 |
| 0.51 | -0.45 | 0.96 | BC001946       | Hs.41641       | BRUNOL4       | bruno-like 4, RNA binding protein (Drosophila)                                                               |
| 0.51 | -1.23 | 1.73 | BC002850       | Hs.379039      | PTD013        | PTD013 protein                                                                                               |
| 0.50 | 0.09  | 0.41 | BC012944       | Hs.74579       | ENC1          | ectodermal-neural cortex (with BTB-like domain)                                                              |
| 0.50 | -1.88 | 2.39 | BC009566       | Hs.171723      | FLJ12748      | hypothetical protein FLJ12748                                                                                |
| 0.50 | -1.05 | 1.55 | BC004424       | Hs.250745      | P2RY2         | purinergic receptor P2Y, G-protein coupled, 2                                                                |
| 0.50 | -0.52 | 1.03 | BC014221       | Hs.256583      | NA 4-14-03 54 |                                                                                                              |
| 0.50 | -0.59 | 1.09 | BC011234       | Hs.79968       | DKFZp434K1210 | hypothetical protein DKFZp434K1210                                                                           |
| 0.50 | 0.27  | 0.23 | BC017123       | Hs.77039       | RAB4A         | RAB4A, member RAS oncogene family                                                                            |
| 0.50 | -0.23 | 0.73 | BC000552       | Data not found | MGC11141      | fucosyltransferase 10 (alpha (1,3) fucosyltransferase)                                                       |
| 0.50 | -0.19 | 0.70 | BC007460       | Hs.1852        | HRIHFB2072    | short coiled coil protein                                                                                    |
| 0.50 | 0.49  | 0.01 | BC004111       | Hs.6980        | ACY1          | aminoacylase 1                                                                                               |
| 0.50 | -0.55 | 1.05 | BC001028       | Hs.30057       | FLJ12949      | hypothetical protein FLJ12949                                                                                |
| 0.50 | -0.41 | 0.92 | BC008937       | Hs.250005      | CBX8          | chromobox homolog 8 (Pc class homolog, Drosophila)                                                           |
| 0.50 | -4.53 | 5.03 | BC001744       | Hs.74592       | ADM           | adrenomedullin                                                                                               |
| 0.50 | 0.33  | 0.17 | BC009529       | Hs.77558       | MGC4161       | hypothetical protein MGC4161                                                                                 |
| 0.50 | -0.76 | 1.26 | BC012992       | Hs.241567      | ING4          | inhibitor of growth family, member 4                                                                         |
| 0.50 | -0.22 | 0.71 | BC002650       | Hs.259599      | SERPINE1      | serine (or cysteine) proteinase inhibitor, clade E (nexin, plasminogen activator inhibitor type 1), member 1 |
| 0.50 | -0.09 | 0.59 | BC004518       | Hs.26971       | MRPS30        | mitochondrial ribosomal protein S30                                                                          |
| 0.50 | 0.03  | 0.47 | BC017238       | Hs.17283       | MEOX2         | mesenchyme homeo box 2 (growth arrest-specific homeo box)                                                    |
| 0.50 | 0.38  | 0.11 | BC001861       | Hs.97978       | P24B          | integral type I protein                                                                                      |
| 0.50 | 0.11  | 0.39 | BC003560       | Hs.406532      | FZD7          | frizzled homolog 7 (Drosophila)                                                                              |
| 0.50 | -1.46 | 1.95 | BC002836       | Hs.1422        | PRO1855       | hypothetical protein PRO1855                                                                                 |
| 0.50 | 0.07  | 0.43 | BC011685       | Hs.79353       | LOC132158     | similar to CG9886 gene product                                                                               |
| 0.50 | -0.38 | 0.87 | BC004301       | Hs.285313      | DNAJA2        | DnaJ (Hsp40) homolog, subfamily A, member 2                                                                  |
| 0.50 | -0.56 | 1.05 | BC020981       | Hs.75782       | ZNF237        | zinc finger protein 237                                                                                      |
| 0.50 | 0.15  | 0.34 | BC013402       | Hs.152894      | LENG4         | leukocyte receptor cluster (LRC) member 4                                                                    |
| 0.49 | -0.02 | 0.52 | BC007339       | Hs.272499      | MCM10         | MCM10 minichromosome maintenance deficient 10 (S. cerevisiae)                                                |
| 0.49 | 0.21  | 0.28 | BC000261       | Hs.724         | UBE2D1        | ubiquitin-conjugating enzyme E2D 1 (UBC4/5 homolog, yeast)                                                   |
| 0.49 | -0.77 | 1.26 | Data not found | FLJ20331       | FLJ20331      | hypothetical protein FLJ20331                                                                                |
| 0.49 | -0.11 | 0.60 | BC000375       | Hs.2281        | VIP32         | hypothetical protein PP5395                                                                                  |
| 0.49 | 0.41  | 0.08 | BC004864       | Hs.75206       | STK16         | serine/threonine kinase 16                                                                                   |
| 0.49 | -2.37 | 2.87 | BC017472       | Hs.24654       | NRGN          | neurogranin (protein kinase C substrate, RC3)                                                                |
| 0.49 | -0.29 | 0.78 | BC003642       | Hs.375620      | ASM3A         | acid sphingomyelinase-like phosphodiesterase                                                                 |
| 0.49 | -0.37 | 0.87 | BC014074       | Hs.30743       | CLPP          | ClpP caseinolytic protease, ATP-dependent, proteolytic subunit homolog (E. coli)                             |
| 0.49 | 0.15  | 0.34 | BC015765       | Hs.315103      | ARHGDI5       | Rho GDP dissociation inhibitor (GDI) beta                                                                    |
| 0.49 | -0.48 | 0.97 | BC011700       | Hs.170171      | TEAD4         | TEA domain family member 4                                                                                   |
| 0.49 | 0.28  | 0.22 | BC009788       | Hs.247324      | MRPS14        | mitochondrial ribosomal protein S14                                                                          |
| 0.49 | 0.31  | 0.18 | BC007072       | Hs.246759      | FBXO26        | F-box only protein 26                                                                                        |
| 0.49 | 0.28  | 0.21 | BC011550       | Hs.182729      | POLR2E        | polymerase (RNA) II (DNA directed) polypeptide E, 25kDa                                                      |

|      |       |      |          |                |                |                                                                                                 |
|------|-------|------|----------|----------------|----------------|-------------------------------------------------------------------------------------------------|
| 0.49 | -0.26 | 0.75 | BC013106 | Hs.206097      | FLJ11294       | hypothetical protein FLJ11294                                                                   |
| 0.49 | -0.12 | 0.61 | BC006811 | Hs.100724      | PPARG          | peroxisome proliferative activated receptor, gamma                                              |
| 0.49 | 0.31  | 0.18 | BC016137 | Hs.2471        | LOC51255       | hypothetical protein LOC51255                                                                   |
| 0.49 | 0.13  | 0.36 | BC014051 | Hs.333513      | RECQL5         | RecQ protein-like 5                                                                             |
| 0.49 | -1.44 | 1.92 | BC007013 | Hs.152983      | FKBPL          | FK506 binding protein like                                                                      |
| 0.49 | -1.13 | 1.62 | BC000948 | Hs.31082       | FLJ10525       | hypothetical protein FLJ10525                                                                   |
| 0.49 | 0.15  | 0.34 | BC001648 | Hs.325321      | WDR18          | WD repeat domain 18                                                                             |
| 0.49 | -0.20 | 0.69 | BC000007 | Hs.279529      | FLJ11126       | hypothetical protein FLJ11126                                                                   |
| 0.49 | -0.08 | 0.56 | BC007734 | Hs.68055       | KPTN           | kaptin (actin binding protein)                                                                  |
| 0.49 | 0.03  | 0.45 | BC019324 | Hs.317403      | MGC2744        | hypothetical protein MGC2744                                                                    |
| 0.49 | -0.73 | 1.22 | BC015708 | Hs.121590      | ZNF259         | zinc finger protein 259                                                                         |
| 0.49 | -0.07 | 0.56 | BC015576 | Hs.194657      | HCA112         | hepatocellular carcinoma-associated antigen 112                                                 |
| 0.49 | 0.08  | 0.41 | BC006498 | Hs.2934        | CGI-38         | brain specific protein                                                                          |
| 0.49 | -0.80 | 1.29 | BC001818 | Hs.7570        | ATPIF1         | ATPase inhibitory factor 1                                                                      |
| 0.49 | -0.13 | 0.61 | BC020546 | Hs.68879       | FLJ14627       | hypothetical protein FLJ14627                                                                   |
| 0.49 | 0.39  | 0.10 | BC000964 | Hs.75485       | OAT            | ornithine aminotransferase (gyrate atrophy)                                                     |
| 0.48 | 0.29  | 0.20 | BC008936 | Hs.254099      | PFN1           | profilin 1                                                                                      |
| 0.48 | -1.74 | 2.23 | BC017272 | Hs.76297       | FLJ21963       | hypothetical protein FLJ21963                                                                   |
| 0.48 | 0.38  | 0.11 | BC000138 | Hs.79024       | HNRPM          | heterogeneous nuclear ribonucleoprotein M                                                       |
| 0.48 | -1.72 | 2.20 | BC014474 | Hs.166160      | MGC15419       | MGC15419 protein                                                                                |
| 0.48 | -0.83 | 1.31 | BC014392 | Hs.433503      | DUSP12         | dual specificity phosphatase 12                                                                 |
| 0.48 | -0.01 | 0.49 | BC010668 | Hs.380094      | UBCE7IP5       | likely ortholog of mouse ubiquitin conjugating enzyme 7 interacting protein 5                   |
| 0.48 | -0.53 | 1.01 | BC004960 | Hs.326739      | SILV           | silver homolog (mouse)                                                                          |
| 0.48 | 0.08  | 0.41 | BC012386 | Hs.8179        | NFKBIE         | nuclear factor of kappa light polypeptide gene enhancer in B-cells inhibitor, epsilon           |
| 0.48 | 0.11  | 0.37 | BC015739 | Hs.90708       | SLC4A2         | solute carrier family 4, anion exchanger, member 2 (erythrocyte membrane protein band 3-like 1) |
| 0.48 | 0.46  | 0.03 | BC003084 | Hs.173739      | GNRPX          | likely ortholog of mouse guanine nucleotide releasing protein x                                 |
| 0.48 | -0.57 | 1.05 | BC017029 | Hs.356463      | FLJ11218       | hypothetical protein FLJ11218                                                                   |
| 0.48 | 0.35  | 0.13 | BC014187 | Hs.121830      | EIF4G1         | eukaryotic translation initiation factor 4 gamma, 1                                             |
| 0.48 | 0.06  | 0.42 | BC011689 | Hs.15921       | MKPX           | mitogen-activated protein kinase phosphatase x                                                  |
| 0.48 | 0.45  | 0.03 | BC001219 | Hs.20768       | DKFZP434B0335  | DKFZP434B0335 protein                                                                           |
| 0.48 | 0.22  | 0.26 | BC010016 | Hs.313342      | C3orf4         | chromosome 3 open reading frame 4                                                               |
| 0.48 | -0.95 | 1.43 | BC012542 | Hs.36232       | KIAA0186       | KIAA0186 gene product                                                                           |
| 0.48 | -0.14 | 0.62 | BC021085 | Hs.878         | ZDHHC9         | zinc finger, DHHC domain containing 9                                                           |
| 0.48 | 0.29  | 0.19 | BC017059 | Hs.155530      | FUSIP1         | FUS interacting protein (serine-arginine rich) 1                                                |
| 0.48 | -0.54 | 1.02 | BC000921 | Hs.273063      | HSPC133        | HSPC133 protein                                                                                 |
| 0.48 | 0.16  | 0.32 | BC011748 | Hs.25292       | MGC17919       | hypothetical protein MGC17919                                                                   |
| 0.48 | -0.64 | 1.12 | BC012389 | Hs.121068      | NA 4-14-03 401 |                                                                                                 |
| 0.48 | -0.10 | 0.57 | BC012801 | Hs.20621       | NA 4-14-03 127 |                                                                                                 |
| 0.48 | -0.92 | 1.40 | BC013724 | Hs.418650      | SPP1           | secreted phosphoprotein 1 (osteopontin, bone sialoprotein I, early T-lymphocyte activation 1)   |
| 0.48 | -0.16 | 0.64 | BC002993 | Hs.272822      | NVL            | nuclear VCP-like                                                                                |
| 0.48 | -1.37 | 1.84 | BC008330 | Data not found | HCLA-ISO       | cyclin L2                                                                                       |
| 0.48 | 0.07  | 0.40 | BC005936 | Hs.44163       | LMOD1          | leiomodrin 1 (smooth muscle)                                                                    |
| 0.47 | -0.25 | 0.73 | BC001604 | Hs.132834      | NA 4-14-03 493 |                                                                                                 |
| 0.47 | 0.15  | 0.32 | BC019016 | Hs.9070        | COP55          | COP9 constitutive photomorphogenic homolog subunit 5 (Arabidopsis)                              |
| 0.47 | 0.24  | 0.24 | BC012761 | Hs.9625        | NR1            | NADPH-dependent FMN and FAD containing oxidoreductase                                           |
| 0.47 | -0.07 | 0.54 | BC013586 | Hs.1432        | PECI           | peroxisomal D3,D2-enoyl-CoA isomerase                                                           |
| 0.47 | 0.02  | 0.45 | BC015931 | Hs.94308       | MS4A1          | membrane-spanning 4-domains, subfamily A, member 1                                              |
| 0.47 | -1.10 | 1.57 | BC009748 | Hs.380681      | MGC12904       | hypothetical protein MGC12904                                                                   |
| 0.47 | 0.35  | 0.12 | BC009376 | Hs.250005      | PDEF           | prostate epithelium-specific Ets transcription factor                                           |
| 0.47 | -1.15 | 1.63 | BC007682 | Hs.12479       | AMSH           | associated molecule with the SH3 domain of STAM                                                 |
| 0.47 | 0.45  | 0.02 | BC010086 | Hs.30376       | MAP3K7         | mitogen-activated protein kinase kinase kinase 7                                                |
| 0.47 | -1.51 | 1.98 | BC016312 | Hs.284162      | MGC15613       | hypothetical protein MGC15613                                                                   |
| 0.47 | -0.06 | 0.53 | BC015127 | Hs.356190      | MGC14436       | hypothetical protein MGC14436                                                                   |

|      |       |      |          |                |                |          |                                                                                          |
|------|-------|------|----------|----------------|----------------|----------|------------------------------------------------------------------------------------------|
| 0.47 | -0.19 | 0.67 | BC009889 | Hs.143954      |                | CBX1     | chromobox homolog 1 (HP1 beta homolog Drosophila )                                       |
| 0.47 | -2.15 | 2.62 | BC013589 | Hs.82116       | ET             |          | hypothetical protein ET                                                                  |
| 0.47 | -0.59 | 1.06 | BC014478 | Hs.193725      |                | HSPB1    | heat shock 27kDa protein 1                                                               |
| 0.47 | -0.88 | 1.35 | BE971258 | Hs.352254      |                | CRIP2    |                                                                                          |
| 0.47 | -0.47 | 0.94 | BC005212 | Hs.258798      |                | C1QTNF6  | C1q and tumor necrosis factor related protein 6                                          |
| 0.47 | -0.49 | 0.96 | BC017453 | Hs.10554       | NA 4-14-03 109 |          |                                                                                          |
| 0.47 | -0.39 | 0.86 | BC005818 | Hs.140452      |                | TIP47    | cargo selection protein (mannose 6 phosphate receptor binding protein)                   |
| 0.47 | -0.02 | 0.49 | BC000917 | Hs.79070       | MYC            |          | v-myc myelocytomatosis viral oncogene homolog (avian)                                    |
| 0.47 | 0.42  | 0.05 | BC008217 | Hs.91684       | LOC92906       |          | hypothetical protein BC008217                                                            |
| 0.47 | -1.50 | 1.97 | BC011761 | Hs.78880       | FLJ12903       |          | hypothetical protein FLJ12903                                                            |
| 0.47 | -0.73 | 1.20 | BC001045 | Hs.226499      |                | SARCOSIN | sarcomeric muscle protein                                                                |
| 0.47 | 0.46  | 0.01 | BC002984 | Hs.15098       | GLUL           |          | glutamate-ammonia ligase (glutamine synthase)                                            |
| 0.47 | -0.28 | 0.75 | BC008495 | Hs.355719      |                | NGFRAP1  | nerve growth factor receptor (TNFRSF16) associated protein 1                             |
| 0.47 | 0.16  | 0.31 | BC016294 | Hs.184877      |                | BMP7     | bone morphogenetic protein 7 (osteogenic protein 1)                                      |
| 0.47 | 0.11  | 0.35 | BC003125 | Hs.323193      |                | ARG2     | arginase, type II                                                                        |
| 0.47 | -1.22 | 1.69 | BC016703 | Hs.122939      |                | PTMS     |                                                                                          |
| 0.47 | -0.45 | 0.91 | BC011821 | Hs.7393        | YARS           |          | tyrosyl-tRNA synthetase                                                                  |
| 0.47 | 0.09  | 0.38 | BC019094 | Hs.3426        | SDS-RS1        |          | likely ortholog of mouse serine dehydratase related sequence 1                           |
| 0.47 | 0.46  | 0.01 | BC010152 | Hs.3439        | NA 4-14-03 246 |          |                                                                                          |
| 0.47 | -0.33 | 0.80 | BC001175 | Hs.118244      |                | CALM2    | calmodulin 2 (phosphorylase kinase, delta)                                               |
| 0.47 | 0.31  | 0.16 | BC000443 | Hs.433813      |                | GDAP1L1  | ganglioside-induced differentiation-associated protein 1-like 1                          |
| 0.46 | -0.13 | 0.59 | BC000383 | Hs.119         | AAAS           |          | achalasia, adrenocortical insufficiency, alacrimia (Allgrove, triple-A)                  |
| 0.46 | 0.18  | 0.29 | BC000607 | Data not found |                | RING1    | ring finger protein 1                                                                    |
| 0.46 | 0.08  | 0.38 | BC008934 | Hs.247902      |                | ABLIM1   | actin binding LIM protein 1                                                              |
| 0.46 | -0.55 | 1.02 | BC006795 | Hs.332938      |                | MGC5370  | hypothetical protein MGC5370                                                             |
| 0.46 | -0.68 | 1.14 | BC019102 | Hs.171118      |                | NXN      | nucleoredoxin                                                                            |
| 0.46 | -1.96 | 2.42 | BC001966 | Hs.102447      |                | THG-1    | TSC-22-like                                                                              |
| 0.46 | -0.62 | 1.08 | BC018991 | Hs.89525       | MDS024         |          | MDS024 protein                                                                           |
| 0.46 | -0.25 | 0.72 | BC002841 | Hs.125819      |                | TIA1     | TIA1 cytotoxic granule-associated RNA binding protein                                    |
| 0.46 | 0.03  | 0.44 | BC015497 | Hs.94865       | GLUL           |          | glutamate-ammonia ligase (glutamine synthase)                                            |
| 0.46 | -0.16 | 0.62 | BC017258 | Hs.57101       | FLJ13902       |          | hypothetical protein FLJ13902                                                            |
| 0.46 | -0.95 | 1.41 | BC005850 | Hs.31551       | SECP43         |          | tRNA selenocysteine associated protein                                                   |
| 0.46 | 0.43  | 0.03 | BC008675 | Hs.278619      |                | PVT1     | Pvt1 oncogene homolog, MYC activator (mouse)                                             |
| 0.46 | -0.08 | 0.54 | BC005402 | Hs.284292      |                | G22P1    | thyroid autoantigen 70kDa (Ku antigen)                                                   |
| 0.46 | -0.06 | 0.52 | BC001472 | Hs.173162      |                | NOC4     | neighbor of COX4                                                                         |
| 0.46 | -0.36 | 0.82 | BC014774 | Hs.41714       | RPS27A         |          | ribosomal protein S27a                                                                   |
| 0.46 | 0.09  | 0.37 | BC017444 | Hs.75653       | NA 4-14-03 63  |          |                                                                                          |
| 0.46 | -0.04 | 0.50 | BC017369 | Hs.184167      |                | FSTL1    | follistatin-like 1                                                                       |
| 0.46 | -0.31 | 0.77 | BC000686 | Hs.46721       | H3F3B          |          | H3 histone, family 3B (H3.3B)                                                            |
| 0.46 | -0.04 | 0.50 | BC008430 | Hs.87295       | RPL34          |          | ribosomal protein L34                                                                    |
| 0.46 | -0.07 | 0.53 | BC008830 | Hs.88959       | ABCD4          |          | ATP-binding cassette, sub-family D (ALD), member 4                                       |
| 0.46 | -0.39 | 0.85 | BC015981 | Hs.192371      |                |          |                                                                                          |
| 0.46 | -0.96 | 1.42 | BC000345 | Hs.406511      | NA 4-14-03 65  |          |                                                                                          |
| 0.46 | -0.51 | 0.97 | BC000532 | Hs.76228       | OS-9           |          | amplified in osteosarcoma                                                                |
| 0.46 | -0.27 | 0.72 | BC001114 | Hs.180062      |                | PSMB8    | proteasome (prosome, macropain) subunit, beta type, 8 (large multifunctional protease 7) |
| 0.46 | -0.63 | 1.09 | BC006250 | Hs.181035      |                | FHL2     | four and a half LIM domains 2                                                            |
| 0.46 | 0.38  | 0.07 | BC000071 | Hs.424961      | NA 4-14-03 416 |          |                                                                                          |
| 0.46 | 0.33  | 0.12 | BC021898 | Hs.348666      |                | PIASY    | protein inhibitor of activated STAT protein PIASy                                        |
| 0.46 | -0.14 | 0.60 | BC014269 | Hs.77324       | POP4           |          | POP4 (processing of precursor , S. cerevisiae) homolog                                   |
| 0.46 | 0.22  | 0.24 | BC017033 | Hs.71465       | CTRB1          |          | chymotrypsinogen B1                                                                      |
| 0.46 | 0.38  | 0.08 | BC001088 | Hs.82906       | CDC20          |          | CDC20 cell division cycle 20 homolog (S. cerevisiae)                                     |
| 0.46 | -0.20 | 0.66 | BC014572 | Hs.146812      |                | UPK1A    | uroplakin 1A                                                                             |
| 0.46 | 0.20  | 0.26 | BC002529 | Hs.281680      |                | PECR     | peroxisomal trans 2-enoyl CoA reductase                                                  |

|      |       |      |           |                      |                |                                                                                                    |
|------|-------|------|-----------|----------------------|----------------|----------------------------------------------------------------------------------------------------|
| 0.46 | 0.25  | 0.21 | BC009621  | Hs.292154            | NA 4-14-03 15  |                                                                                                    |
| 0.45 | 0.02  | 0.44 | BC004555  | Hs.279852            | PTTG1IP        | pituitary tumor-transforming 1 interacting protein                                                 |
| 0.45 | -1.11 | 1.57 | NM_032380 | Hs.334718            | GAS2L1         | growth arrest-specific 2 like 1                                                                    |
| 0.45 | 0.31  | 0.14 | BC005236  | Hs.334672            | SRPR           | signal recognition particle receptor ('docking protein')                                           |
| 0.45 | -1.27 | 1.72 | BC017046  | Hs.118796            | SLC7A7         | solute carrier family 7 (cationic amino acid transporter, y+ system), member 7                     |
| 0.45 | -0.50 | 0.95 | BC002488  | Hs.165998            | PAI-RBP1       | PAI-1 mRNA-binding protein                                                                         |
| 0.45 | -0.17 | 0.62 | BC012946  | Hs.33254             | CGI-62         | CGI-62 protein                                                                                     |
| 0.45 | 0.35  | 0.10 | BC020499  | Hs.29203             | G22P1          | thyroid autoantigen 70kDa (Ku antigen)                                                             |
| 0.45 | 0.32  | 0.13 | BC000456  | Hs.114360            | PL6            | PL6 protein                                                                                        |
| 0.45 | -0.36 | 0.81 | BC000463  | Hs.195614            | ZNF22          | zinc finger protein 22 (KOX 15)                                                                    |
| 0.45 | -0.48 | 0.93 | BC002513  | Hs.151777            | EIF2S1         | eukaryotic translation initiation factor 2, subunit 1 alpha, 35kDa                                 |
| 0.45 | 0.39  | 0.06 | BC017211  | Hs.54320             | SPHK2          | sphingosine kinase 2                                                                               |
| 0.45 | -0.33 | 0.78 | BC008053  | Hs.8008              | CKS1B          | CDC28 protein kinase regulatory subunit 1B                                                         |
| 0.45 | -0.05 | 0.50 | BC008307  | Hs.279529            | NDUFV1         | NADH dehydrogenase (ubiquinone) flavoprotein 1, 51kDa                                              |
| 0.45 | -0.43 | 0.88 | BC007097  | Hs.5831              | FLJ10597       | hypothetical protein FLJ10597                                                                      |
| 0.45 | -1.65 | 2.10 | BC007655  | In multiple clusters | PPP1R2         |                                                                                                    |
| 0.45 | 0.42  | 0.03 | BC007729  | Hs.12845             | TNNT1          | troponin T1, skeletal, slow                                                                        |
| 0.45 | -0.60 | 1.05 | BC018189  | Hs.349506            | FLJ22175       | hypothetical protein FLJ22175                                                                      |
| 0.45 | 0.36  | 0.09 | BC002825  | Hs.38681             | HMG20A         | high-mobility group 20A                                                                            |
| 0.45 | -1.55 | 1.99 | BC008720  | Hs.9383              | CDT1           | DNA replication factor                                                                             |
| 0.45 | -0.17 | 0.62 | BC012766  | Hs.180428            | XPA            | xeroderma pigmentosum, complementation group A                                                     |
| 0.45 | -0.39 | 0.83 | BC004479  | Hs.37106             | ITM2C          | integral membrane protein 2C                                                                       |
| 0.45 | -0.68 | 1.12 | BC017091  | Hs.78547             | MGP            | matrix Gla protein                                                                                 |
| 0.45 | 0.42  | 0.02 | BC001108  | Hs.5245              | FLJ20643       | hypothetical protein FLJ20643                                                                      |
| 0.45 | -0.98 | 1.43 | BC015701  | Hs.170096            | NFKB2          | nuclear factor of kappa light polypeptide gene enhancer in B-cells 2 (p49/p100)                    |
| 0.44 | -0.81 | 1.25 | BC002815  | Hs.324784            | MGC4342        | hypothetical protein MGC4342                                                                       |
| 0.44 | 0.17  | 0.27 | BC005186  | Hs.3385              | SERPINA1       | serine (or cysteine) proteinase inhibitor, clade A (alpha-1 antiproteinase, antitrypsin), member 1 |
| 0.44 | -0.60 | 1.04 | BC007220  | Hs.381043            | TOP3B          | topoisomerase (DNA) III beta                                                                       |
| 0.44 | -0.47 | 0.92 | BC006295  | Hs.127337            | SDCCAG3        | serologically defined colon cancer antigen 3                                                       |
| 0.44 | -0.52 | 0.96 | BC006291  | Hs.25303             | FLJ20288       | FLJ20288 protein                                                                                   |
| 0.44 | -0.61 | 1.05 | BC013353  | Hs.14070             | TAGAP          | T-cell activation GTPase activating protein                                                        |
| 0.44 | -0.36 | 0.80 | BC002588  | Hs.405528            | PPP1CA         | protein phosphatase 1, catalytic subunit, alpha isoform                                            |
| 0.44 | -0.81 | 1.26 | BC001331  | Hs.79672             | KIAA0652       | KIAA0652 gene product                                                                              |
| 0.44 | -0.33 | 0.78 | BC001459  | Hs.343807            | RAD51          | RAD51 homolog (RecA homolog, E. coli) (S. cerevisiae)                                              |
| 0.44 | 0.30  | 0.14 | BC015391  | Hs.433898            | RTDR1          | rhabdoid tumor deletion region gene 1                                                              |
| 0.44 | -0.10 | 0.54 | BC018109  | Hs.272673            | FLJ10983       | hypothetical protein FLJ10983                                                                      |
| 0.44 | -0.23 | 0.67 | BC010188  | Data not found       | FMNL           | formin-like                                                                                        |
| 0.44 | -1.16 | 1.60 | BC015355  | Hs.200395            | SAA4           | serum amyloid A4, constitutive                                                                     |
| 0.44 | -1.43 | 1.87 | BC008734  | Hs.111903            | FCGRT          | Fc fragment of IgG, receptor, transporter, alpha                                                   |
| 0.44 | -1.08 | 1.52 | BC007300  | Hs.84746             | ASAHI          | N-acylsphingosine amidohydrolase (acid ceramidase) 1                                               |
| 0.44 | -0.17 | 0.61 | BC015809  | Hs.21189             | COPEB          | core promoter element binding protein                                                              |
| 0.44 | 0.37  | 0.07 | BC009731  | Hs.334637            | ENDOG          | endonuclease G                                                                                     |
| 0.44 | -0.62 | 1.06 | BC005848  | Hs.70582             | DDX32          | DEAD/H (Asp-Glu-Ala-Asp/His) box polypeptide 32                                                    |
| 0.44 | -0.10 | 0.54 | BC016835  | Hs.80919             | KIAA1049       | KIAA1049 protein                                                                                   |
| 0.44 | 0.29  | 0.15 | BC014449  | Hs.266738            | NA 4-14-03 142 |                                                                                                    |
| 0.44 | -0.40 | 0.83 | BC006290  | Hs.348407            | PTD011         | PTD011 protein                                                                                     |
| 0.44 | -1.19 | 1.63 | BC004971  | Hs.433411            | NDUFS1         | NADH dehydrogenase (ubiquinone) Fe-S protein 1, 75kDa (NADH-coenzyme Q reductase)                  |
| 0.44 | 0.24  | 0.20 | BC003161  | Hs.6780              | ARR3           | arrestin 3, retinal (X-arrestin)                                                                   |
| 0.44 | -0.29 | 0.72 | BC018509  | Hs.179881            | PTK7           |                                                                                                    |
| 0.44 | 0.08  | 0.36 | BC012056  | Hs.99603             | HGS            |                                                                                                    |
| 0.44 | 0.00  | 0.44 | BC002414  | In multiple clusters | MGC10701       | hypothetical protein MGC10701                                                                      |
| 0.44 | 0.16  | 0.27 | BC010629  | Hs.129055            | MGC4692        | hypothetical protein MGC4692                                                                       |
| 0.44 | 0.14  | 0.30 | BC014204  | Hs.311100            | TUBB2          | tubulin, beta, 2                                                                                   |

|      |       |      |          |                |               |                                                                                                                                 |
|------|-------|------|----------|----------------|---------------|---------------------------------------------------------------------------------------------------------------------------------|
| 0.44 | -0.10 | 0.54 | BC003373 | Hs.288856      | PFDN5         | prefoldin 5                                                                                                                     |
| 0.44 | -0.93 | 1.37 | BC010241 | Hs.159651      | NA 4-14-03 37 |                                                                                                                                 |
| 0.44 | -0.79 | 1.23 | BC001957 | Data not found | DPP7          |                                                                                                                                 |
| 0.44 | -0.54 | 0.97 | BC000745 | Hs.42053       | MXD3          | MAX dimerization protein 3                                                                                                      |
| 0.44 | -0.33 | 0.77 | BC004372 | Hs.169610      | ARL2          | ADP-ribosylation factor-like 2                                                                                                  |
| 0.44 | -0.40 | 0.84 | BC001613 | Hs.8719        | POLR3K        | polymerase (RNA) III (DNA directed) polypeptide K, 12.3 kDa                                                                     |
| 0.44 | -0.21 | 0.64 | BC011238 | Hs.236438      | MGC15397      | similar to RIKEN cDNA 5730578N08 gene                                                                                           |
| 0.44 | 0.33  | 0.10 | BC004371 | Hs.279518      | NDUFB7        | NADH dehydrogenase (ubiquinone) 1 beta subcomplex, 7, 18kDa                                                                     |
| 0.44 | 0.10  | 0.33 | BC017655 | Hs.8859        | SFRS4         | splicing factor, arginine/serine-rich 4                                                                                         |
| 0.44 | -0.07 | 0.50 | BC007268 | Hs.279529      | ITGB3BP       | integrin beta 3 binding protein (beta3-endonexin)                                                                               |
| 0.43 | -0.76 | 1.19 | BC001176 | Hs.84232       | ACOX1         | acyl-Coenzyme A oxidase 1, palmitoyl                                                                                            |
| 0.43 | -1.09 | 1.52 | BC010995 | Hs.26110       | NT5C3         | 5'-nucleotidase, cytosolic III                                                                                                  |
| 0.43 | 0.23  | 0.20 | BC000024 | Hs.180780      | C15orf15      | chromosome 15 open reading frame 15                                                                                             |
| 0.43 | 0.00  | 0.43 | BC015387 | Data not found | DT1P1A10      | hypothetical protein DT1P1A10                                                                                                   |
| 0.43 | -0.21 | 0.64 | BC004139 | Hs.334450      | IRF5          | interferon regulatory factor 5                                                                                                  |
| 0.43 | -0.17 | 0.60 | BC018645 | Hs.72241       | GOA           | tripartite motif-containing 47                                                                                                  |
| 0.43 | 0.19  | 0.24 | BC016158 | Hs.288623      | GNG7          | guanine nucleotide binding protein (G protein), gamma 7                                                                         |
| 0.43 | 0.05  | 0.38 | BC009199 | Hs.8867        | MLPH          | melanophilin                                                                                                                    |
| 0.43 | -0.67 | 1.10 | BC000158 | Hs.374608      | MGC:5244      | hypothetical protein MGC5244                                                                                                    |
| 0.43 | 0.08  | 0.35 | BC010137 | Hs.127496      | MGC17943      | hypothetical protein MGC17943                                                                                                   |
| 0.43 | 0.01  | 0.42 | BC009680 | Hs.77290       | LYL1          | lymphoblastic leukemia derived sequence 1                                                                                       |
| 0.43 | -0.07 | 0.50 | BC010868 | Hs.100861      | FLJ10324      | hypothetical protein FLJ10324                                                                                                   |
| 0.43 | -0.48 | 0.90 | BC017287 | Hs.5662        | LOXL1         | lysyl oxidase-like 1                                                                                                            |
| 0.43 | -0.41 | 0.84 | BC012137 | Hs.302300      | DUSP6         | dual specificity phosphatase 6                                                                                                  |
| 0.43 | -0.53 | 0.96 | BC008865 | Hs.406548      |               | Homo sapiens, clone IMAGE:4151631, mRNA                                                                                         |
| 0.43 | -0.92 | 1.35 | BC017455 | Hs.77385       | CYLN2         | cytoplasmic linker 2                                                                                                            |
| 0.43 | -0.52 | 0.95 | BC000253 | Hs.75527       | NDUFC2        | NADH dehydrogenase (ubiquinone) 1, subcomplex unknown, 2, 14.5kDa                                                               |
| 0.43 | 0.07  | 0.35 | BC014108 | Hs.1416        | RAPSN         | receptor-associated protein of the synapse, 43kD                                                                                |
| 0.43 | 0.15  | 0.28 | BC015417 | Hs.131987      | LOC113444     | hypothetical protein BC011880                                                                                                   |
| 0.43 | 0.38  | 0.05 | BC004105 | Hs.18048       | MGLL          | monoglyceride lipase                                                                                                            |
| 0.43 | -1.10 | 1.53 | BC005954 | Hs.211914      | PCDHA2        | protocadherin alpha 2                                                                                                           |
| 0.43 | -0.04 | 0.47 | BC014551 | Hs.7277        | PEX3          | peroxisomal biogenesis factor 3                                                                                                 |
| 0.43 | -0.41 | 0.83 | BC015466 | Hs.159651      | MGC19604      | similar to RIKEN cDNA B230118G17 gene                                                                                           |
| 0.43 | -0.39 | 0.82 | BC000740 | Hs.203         | MGC14817      | hypothetical protein MGC14817                                                                                                   |
| 0.43 | -0.50 | 0.93 | BC011855 | Hs.6216        | RBM5          | RNA binding motif protein 5                                                                                                     |
| 0.43 | -0.62 | 1.05 | BC010046 | Hs.334         | H2AFC         | histone 1, H2ai                                                                                                                 |
| 0.43 | -0.29 | 0.72 | BC003611 | Hs.279868      | SAE1          | SUMO-1 activating enzyme subunit 1                                                                                              |
| 0.43 | -1.32 | 1.74 | AB067510 | Hs.85969       | MGC4175       | hypothetical protein MGC4175                                                                                                    |
| 0.42 | -0.01 | 0.44 | BC010405 | Hs.57100       | DKFZP547N043  | hypothetical protein DKFZp547N043                                                                                               |
| 0.42 | 0.21  | 0.21 | BC014563 | Hs.334562      | AGPAT2        | 1-acylglycerol-3-phosphate O-acyltransferase 2 (lysophosphatidic acid acyltransferase, beta)                                    |
| 0.42 | -0.95 | 1.37 | BC003183 | Hs.3826        | C3IP1         | kelch-like protein C3IP1                                                                                                        |
| 0.42 | 0.40  | 0.02 | BC010915 | Hs.226795      | GSTP1         | glutathione S-transferase pi                                                                                                    |
| 0.42 | -0.54 | 0.97 | BC000010 | Hs.44396       | HOXB13        | homeo box B13                                                                                                                   |
| 0.42 | -0.73 | 1.15 | BC001100 | Hs.279554      | H2AFL         | histone 1, H2ac                                                                                                                 |
| 0.42 | 0.22  | 0.20 | BC011586 | Hs.6980        | ENO1          | enolase 1, (alpha)                                                                                                              |
| 0.42 | 0.14  | 0.28 | BC019034 | Data not found | GPSN2         | glycoprotein, synaptic 2                                                                                                        |
| 0.42 | -0.99 | 1.41 | BC003382 | Hs.11183       | SNX2          | sorting nexin 2                                                                                                                 |
| 0.42 | -0.23 | 0.66 | BC002436 | Hs.83734       | DSCR1         | Down syndrome critical region gene 1                                                                                            |
| 0.42 | -0.29 | 0.71 | BC011845 | Hs.406444      | SH120         | putative G-protein coupled receptor                                                                                             |
| 0.42 | 0.33  | 0.09 | BC007213 | Hs.22353       | ATP5L         | ATP synthase, H+ transporting, mitochondrial F0 complex, subunit g                                                              |
| 0.42 | 0.07  | 0.35 | BC002444 | Hs.15106       | ERCC1         | excision repair cross-complementing rodent repair deficiency, complementation group 1 (includes overlapping antisense sequence) |

|      |       |      |                |                      |            |                                                                                                    |
|------|-------|------|----------------|----------------------|------------|----------------------------------------------------------------------------------------------------|
| 0.42 | 0.41  | 0.01 | BC010860       | Hs.82085             | KIAA1622   | HEAT-like repeat-containing protein                                                                |
| 0.42 | -0.23 | 0.65 | BC012751       | Data not found       | HOXD1      | homeo box D1                                                                                       |
| 0.42 | 0.11  | 0.31 | BC008717       | Hs.283738            | CSNK1A1    | casein kinase 1, alpha 1                                                                           |
| 0.42 | -0.83 | 1.25 | BC012448       | Hs.116784            | MTCH1      | mitochondrial carrier homolog 1                                                                    |
| 0.42 | 0.33  | 0.09 | BC007538       | Data not found       | SLC16A4    | solute carrier family 16 (monocarboxylic acid transporters), member 4                              |
| 0.42 | -0.81 | 1.24 | BC014260       | Hs.271742            | SMAP-5     | golgi membrane protein SB140                                                                       |
| 0.42 | -0.79 | 1.21 | BC007441       | Hs.23348             | SKP2       | S-phase kinase-associated protein 2 (p45)                                                          |
| 0.42 | -0.34 | 0.76 | BC002912       | Hs.380081            | MGC2198    | hypothetical protein MGC2198                                                                       |
| 0.42 | -1.18 | 1.60 | BC017366       | Hs.26703             | FLJ10565   | hypothetical protein FLJ10565                                                                      |
| 0.42 | -0.03 | 0.45 | BC009025       | Hs.94891             | FLJ12606   | hypothetical protein FLJ12606                                                                      |
| 0.42 | -0.88 | 1.30 | BC007781       | Hs.108183            | RBMS1      | RNA binding motif, single stranded interacting protein 1                                           |
| 0.42 | -0.50 | 0.92 | BC012600       | Hs.84673             | TNNI1      | troponin I, skeletal, slow                                                                         |
| 0.42 | 0.19  | 0.23 | BC001767       | Hs.425311            | CD24       | CD24 antigen (small cell lung carcinoma cluster 4 antigen)                                         |
| 0.42 | -0.43 | 0.84 | BC000795       | Hs.194385            | FLJ20234   | hypothetical protein FLJ20234                                                                      |
| 0.42 | 0.18  | 0.24 | BC000707       | Hs.46735             | UBXD1      | UBX domain containing 1                                                                            |
| 0.42 | -0.34 | 0.76 | BC009722       | Hs.105887            | PLP1       | proteolipid protein 1 (Pelizaeus-Merzbacher disease, spastic paraplegia 2, uncomplicated)          |
| 0.42 | -0.60 | 1.01 | BC003558       | Hs.75852             | HRIHFB2206 | HRIHFB2206 protein                                                                                 |
| 0.42 | 0.35  | 0.07 | BC012977       | Hs.283724            | LGALS3BP   | lectin, galactoside-binding, soluble, 3 binding protein                                            |
| 0.42 | -0.11 | 0.52 | BC015930       | Hs.186961            | TRIP6      | thyroid hormone receptor interactor 6                                                              |
| 0.42 | 0.18  | 0.24 | BC001756       | Hs.1869              | PIGC       | phosphatidylinositol glycan, class C                                                               |
| 0.42 | -0.28 | 0.70 | BC010950       | Hs.99949             | PIP        | prolactin-induced protein                                                                          |
| 0.42 | -0.88 | 1.30 | BC002347       | Data not found       | PXR1       | peroxisome receptor 1                                                                              |
| 0.42 | -0.53 | 0.95 | BC009701       | Hs.33455             | SNX5       | sorting nexin 5                                                                                    |
| 0.42 | -0.11 | 0.53 | BC008017       | Hs.20776             | SERPINA1   | serine (or cysteine) proteinase inhibitor, clade A (alpha-1 antiproteinase, antitrypsin), member 1 |
| 0.42 | -0.85 | 1.27 | BC002448       | Hs.158203            | CLDN6      | claudin 6                                                                                          |
| 0.42 | -0.46 | 0.88 | BC020490       | Hs.247302            | CDK5RAP3   | CDK5 regulatory subunit associated protein 3                                                       |
| 0.42 | -0.89 | 1.31 | BC015490       | Hs.431175            | PIPE       | peptidylprolyl isomerase E (cyclophilin E)                                                         |
| 0.41 | -1.01 | 1.42 | Data not found |                      | NDRG2      | NDRG family member 2                                                                               |
| 0.41 | 0.36  | 0.06 | BC002460       | Hs.28555             | LOC51760   | B/K protein                                                                                        |
| 0.41 | 0.18  | 0.23 | BC013566       | Hs.234642            | ZNF146     | zinc finger protein 146                                                                            |
| 0.41 | -1.86 | 2.28 | BC006097       | Hs.1802              | BMI1       | B lymphoma Mo-MLV insertion region (mouse)                                                         |
| 0.41 | 0.10  | 0.32 | BC012510       | Hs.64639             | FLJ20010   | hypothetical protein FLJ20010                                                                      |
| 0.41 | -0.61 | 1.02 | BC017382       | Hs.101799            | PPARD      | peroxisome proliferative activated receptor, delta                                                 |
| 0.41 | -1.11 | 1.53 | BC007023       | Hs.194382            | LOC133957  |                                                                                                    |
| 0.41 | -0.74 | 1.15 | BC006969       | Hs.7627              | CRB3       | crumbs homolog 3 (Drosophila)                                                                      |
| 0.41 | -2.39 | 2.80 | BC002586       | Hs.250745            | APP        | amyloid beta (A4) precursor protein (protease nexin-II, Alzheimer disease)                         |
| 0.41 | 0.38  | 0.03 | BC015990       | Hs.423444            | D4S234E    | DNA segment on chromosome 4 (unique) 234 expressed sequence                                        |
| 0.41 | -2.50 | 2.91 | BC002564       | Hs.155218            | E1B-AP5    | E1B-55kDa-associated protein 5                                                                     |
| 0.41 | -1.37 | 1.78 | BC012321       | Hs.40888             | FLJ20721   | hypothetical protein FLJ20721                                                                      |
| 0.41 | -0.04 | 0.45 | BC007254       | Hs.76228             | ID1I       | isopentenyl-diphosphate delta isomerase                                                            |
| 0.41 | -0.01 | 0.42 | BC012381       | Hs.6823              | HIBCH      | 3-hydroxyisobutyryl-Coenzyme A hydrolase                                                           |
| 0.41 | -0.08 | 0.49 | BC020983       | Hs.111126            | NHP2L1     | NHP2 non-histone chromosome protein 2-like 1 (S. cerevisiae)                                       |
| 0.41 | -1.85 | 2.25 | BC002364       | In multiple clusters | STOM       | stomatins                                                                                          |
| 0.41 | 0.37  | 0.04 | BC002690       | Hs.355214            | ABCD3      | ATP-binding cassette, sub-family D (ALD), member 3                                                 |
| 0.41 | 0.22  | 0.19 | BC005139       | Hs.3759              | TETRAN     | tetracycline transporter-like protein                                                              |
| 0.41 | -0.98 | 1.39 | BC000344       | Hs.279868            | FLJ23436   | hypothetical protein FLJ23436                                                                      |
| 0.41 | -0.53 | 0.94 | BC001244       | Data not found       | KIAA0174   | KIAA0174 gene product                                                                              |
| 0.41 | -0.34 | 0.75 | BC005333       | Hs.180866            | TNFRSF10A  | tumor necrosis factor receptor superfamily, member 10a                                             |
| 0.41 | -0.74 | 1.15 | BC010512       | Hs.93678             | MGC16212   | hypothetical protein MGC16212                                                                      |
| 0.41 | -0.55 | 0.96 | BC007860       | Hs.22393             | MGC24302   | hypothetical protein MGC24302                                                                      |
| 0.41 | -0.89 | 1.30 | BC000329       | Hs.184510            | SFN        | stratifin                                                                                          |
| 0.41 | -0.76 | 1.17 | BC009893       | Hs.170027            | SLC1A5     | solute carrier family 1 (neutral amino acid transporter), member 5                                 |
| 0.41 | -0.30 | 0.71 | BC011557       | Hs.172740            | SIRT2      | sirtuin (silent mating type information regulation 2 homolog) 2 (S. cerevisiae)                    |

|      |       |      |          |           |                |                                                                                      |
|------|-------|------|----------|-----------|----------------|--------------------------------------------------------------------------------------|
| 0.41 | 0.03  | 0.38 | BC009196 | Hs.432840 | NA 4-14-03 130 |                                                                                      |
| 0.41 | -0.82 | 1.23 | BC003640 | Hs.30661  | ACAS2          | acetyl-Coenzyme A synthetase 2 (ADP forming)                                         |
| 0.41 | -0.16 | 0.57 | BC007034 | Hs.118786 | NA 4-14-03 75  |                                                                                      |
| 0.41 | 0.18  | 0.22 | BC008887 | Hs.95867  | PIM2           | pim-2 oncogene                                                                       |
| 0.41 | -0.84 | 1.25 | BC019019 | Hs.75850  | MGC4645        | hypothetical protein MGC4645                                                         |
| 0.41 | -0.82 | 1.23 | BC018119 | Hs.349650 | MGC19606       | similar to HYPOTHETICAL 34.0 KDA PROTEIN ZK795.3 IN CHROMOSOME IV                    |
| 0.41 | -0.09 | 0.49 | BC009872 | Hs.20644  | ALP            | asparaginase like 1                                                                  |
| 0.41 | 0.26  | 0.15 | BC000391 | Hs.66196  | KIAA1796       | KIAA1796 protein                                                                     |
| 0.41 | -0.58 | 0.98 | BC015037 | Hs.51305  | LAMA4          | laminin, alpha 4                                                                     |
| 0.41 | -0.54 | 0.94 | BC015749 | Hs.239356 | FLJ22728       | hypothetical protein FLJ22728                                                        |
| 0.41 | 0.05  | 0.35 | BC009743 | Hs.227782 | AMID           | apoptosis-inducing factor (AIF)-homologous mitochondrion-associated inducer of death |
| 0.41 | 0.15  | 0.25 | BC008844 | Hs.6294   | MRPL20         | mitochondrial ribosomal protein L20                                                  |
| 0.41 | 0.10  | 0.30 | BC006402 | Hs.413826 | DNAJB2         | DnaJ (Hsp40) homolog, subfamily B, member 2                                          |
| 0.40 | -0.18 | 0.58 | BC012050 | Hs.14376  | CGI-20         | CGI-20 protein                                                                       |
| 0.40 | -0.74 | 1.14 | BC001672 | Hs.352065 | C20orf162      | chromosome 20 open reading frame 162                                                 |
| 0.40 | -0.63 | 1.03 | BC001693 | Hs.382367 | LGALS1         | lectin, galactoside-binding, soluble, 1 (galectin 1)                                 |
| 0.40 | 0.36  | 0.04 | BC016282 | Hs.155212 | DKFZP586I2223  | intermediate filament-like MGC:2625                                                  |
| 0.40 | 0.27  | 0.13 | BC016841 | Hs.301853 | RPL23          | ribosomal protein L23                                                                |
| 0.40 | -0.37 | 0.77 | BC002491 | Hs.271614 | CGI-112        | CGI-112 protein                                                                      |
| 0.40 | -0.35 | 0.75 | BC002712 | Hs.25960  | ZFP36          | zinc finger protein 36, C3H type, homolog (mouse)                                    |
| 0.40 | -0.10 | 0.51 | BC011681 | Hs.4877   | AASDHPPT       | aminoadipate-semialdehyde dehydrogenase-phosphopantetheinyl transferase              |
| 0.40 | -0.60 | 1.00 | BC021701 | Hs.353161 | Cab45          | calcium binding protein Cab45 precursor                                              |
| 0.40 | -0.68 | 1.09 | BC005946 | Hs.406578 | BART1          | binder of Arl Two                                                                    |
| 0.40 | 0.03  | 0.37 | BC001738 | Hs.192853 | NA 4-14-03 112 |                                                                                      |
| 0.40 | 0.15  | 0.25 | BC001482 | Hs.8128   | MGC2650        | hypothetical protein MGC2650                                                         |
| 0.40 | -0.23 | 0.63 | BC000370 | Hs.91448  | NA 4-14-03 125 |                                                                                      |
| 0.40 | -0.15 | 0.55 | BC009920 | Hs.9315   | FANCG          | Fanconi anemia, complementation group G                                              |
| 0.40 | -0.36 | 0.76 | BC010374 | Hs.96448  | ZNF193         | zinc finger protein 193                                                              |
| 0.40 | -0.02 | 0.42 | BC014961 | Hs.11463  | FLJ21977       | hypothetical protein FLJ21977                                                        |
| 0.40 | -0.10 | 0.50 | BC003353 | Hs.13885  | MGC5309        | hypothetical protein MGC5309                                                         |
| 0.40 | -0.72 | 1.12 | BC014459 | Hs.419463 | NPD002         | NPD002 protein                                                                       |
| 0.40 | -0.41 | 0.81 | BC011702 | Hs.381200 | RABL2B         | RAB, member of RAS oncogene family-like 2B                                           |
| 0.40 | 0.30  | 0.10 | BC011901 | Hs.2785   | ZNF24          | zinc finger protein 24 (KOX 17)                                                      |
| 0.40 | -0.20 | 0.60 | BC010100 | Hs.28935  | HSPC023        | HSPC023 protein                                                                      |
| 0.40 | -0.65 | 1.05 | BC010879 | Hs.3123   | MGC10744       | hypothetical protein MGC10744                                                        |
| 0.40 | -1.29 | 1.69 | BC006110 | Hs.7980   | TLE2           | transducin-like enhancer of split 2 (E(sp1) homolog, Drosophila)                     |
| 0.40 | -0.38 | 0.78 | BC007889 | Hs.251653 | FLJ20211       | hypothetical protein FLJ20211                                                        |
| 0.40 | -0.33 | 0.72 | BC004552 | Hs.330986 | MIC2           | CD99 antigen                                                                         |
| 0.40 | -0.57 | 0.97 | BC012629 | Hs.30212  | TRIP15         | thyroid receptor interacting protein 15                                              |
| 0.40 | -0.20 | 0.60 | BC007381 | Hs.119756 | FLJ12787       | hypothetical protein FLJ12787                                                        |
| 0.40 | -0.02 | 0.41 | BC000397 | Hs.202384 | ASIC4          | putative acid-sensing ion channel                                                    |
| 0.40 | -0.81 | 1.20 | BC001956 | Hs.125489 | CALM1          | calmodulin 1 (phosphorylase kinase, delta)                                           |
| 0.39 | -1.44 | 1.83 | BC007562 | Hs.106357 | MGC23937       | hypothetical protein MGC23937 similar to CG4798                                      |
| 0.39 | 0.20  | 0.19 | BC001711 | Hs.434034 | SGK2           | serum/glucocorticoid regulated kinase 2                                              |
| 0.39 | 0.31  | 0.09 | BC005028 | Hs.25625  | NA 4-14-03 83  |                                                                                      |
| 0.39 | -4.03 | 4.42 | BC017016 | Hs.149227 | RPP30          | ribonuclease P (30kD)                                                                |
| 0.39 | -0.48 | 0.88 | BC014978 | Hs.380417 | NA 4-14-03 455 |                                                                                      |
| 0.39 | -0.23 | 0.62 | BC001841 | Hs.250624 | KIAA1838       | KIAA1838 protein                                                                     |
| 0.39 | -0.83 | 1.22 | BC015013 | Hs.283716 | FLJ22191       | hypothetical protein FLJ22191                                                        |
| 0.39 | -0.83 | 1.22 | BC008115 | Hs.25245  | MGC16063       | hypothetical protein MGC16063                                                        |
| 0.39 | 0.31  | 0.08 | BC014940 | Hs.180933 | NA 4-14-03 143 |                                                                                      |
| 0.39 | 0.36  | 0.02 | BC010153 | Hs.95577  | RPA1           | replication protein A1, 70kDa                                                        |
| 0.39 | -0.21 | 0.60 | BC007092 | Hs.66731  | CORO2A         | coronin, actin binding protein, 2A                                                   |



|      |       |      |                |                |                |                                                                                    |
|------|-------|------|----------------|----------------|----------------|------------------------------------------------------------------------------------|
| 0.39 | 0.02  | 0.36 | BC004146       | Hs.261927      | PSMB5          | proteasome (prosome, macropain) subunit, beta type, 5                              |
| 0.39 | -0.29 | 0.68 | BC012074       | Hs.8966        | FLJ20424       | chromosome 14 open reading frame 94                                                |
| 0.39 | -1.32 | 1.71 | BC000924       | Hs.321170      | NBR2           | NBR2                                                                               |
| 0.39 | 0.29  | 0.10 | BC007346       | Hs.417710      | RSU1           | Ras suppressor protein 1                                                           |
| 0.39 | -1.33 | 1.72 | BC021209       | Hs.110953      | MGC13102       | hypothetical protein MGC13102                                                      |
| 0.39 | -1.16 | 1.54 | BC001352       | Hs.336780      | TUBB           | tubulin, beta polypeptide                                                          |
| 0.39 | -0.60 | 0.99 | BC001321       | Hs.301404      | RBM3           | RNA binding motif protein 3                                                        |
| 0.39 | -0.23 | 0.62 | BC004222       | Hs.19002       | DKFZp434H247   | hypothetical protein DKFZp434H247                                                  |
| 0.39 | -1.80 | 2.19 | BC016026       | Hs.42438       | HMG20B         | high-mobility group 20B                                                            |
| 0.39 | 0.36  | 0.03 | BC005181       | Hs.109253      | RBM8A          | RNA binding motif protein 8A                                                       |
| 0.39 | -0.34 | 0.73 | BC001006       | Hs.289271      | C1orf2         | chromosome 1 open reading frame 2                                                  |
| 0.39 | -1.41 | 1.80 | BC014476       | Hs.36752       | STARD7         | START domain containing 7                                                          |
| 0.39 | 0.33  | 0.06 | BC021985       | Hs.283109      | NOLA2          | nucleolar protein family A, member 2 (H/ACA small nucleolar RNPs)                  |
| 0.39 | -0.44 | 0.83 | BC017175       | Hs.323396      | ARF4L          | ADP-ribosylation factor 4-like                                                     |
| 0.39 | 0.27  | 0.11 | BC016028       | Data not found | SDCBP2         | syndecan binding protein (syntenin) 2                                              |
| 0.39 | 0.28  | 0.11 | BC000664       | Hs.300423      | EIF4A1         | eukaryotic translation initiation factor 4A, isoform 1                             |
| 0.39 | -0.48 | 0.87 | BC009321       | Data not found | NA 4-14-03 76  |                                                                                    |
| 0.38 | -0.28 | 0.66 | BC006463       | Hs.100641      | CASP9          | caspase 9, apoptosis-related cysteine protease                                     |
| 0.38 | -0.31 | 0.69 | BC005235       | Hs.15164       | AGA            | aspartylglucosaminidase                                                            |
| 0.38 | -0.09 | 0.48 | BC019305       | Hs.406444      | TA-NFKBH       | T-cell activation NFKB-like protein                                                |
| 0.38 | -1.26 | 1.64 | BC001106       | Hs.181444      | FLJ10156       | hypothetical protein FLJ10156                                                      |
| 0.38 | -0.26 | 0.64 | BC014006       | Hs.100071      | C20orf4        | chromosome 20 open reading frame 4                                                 |
| 0.38 | -0.08 | 0.47 | BC015313       | Hs.349905      | ACY-3          | aspartoacylase-3                                                                   |
| 0.38 | -0.20 | 0.59 | BC008151       | Hs.5422        | ST13           | suppression of tumorigenicity 13 (colon carcinoma) (Hsp70 interacting protein)     |
| 0.38 | 0.23  | 0.15 | BC007621       | Hs.225795      | LOC115950      | hypothetical protein BC016816                                                      |
| 0.38 | 0.32  | 0.07 | BC007349       | Hs.60679       | NNMT           | nicotinamide N-methyltransferase                                                   |
| 0.38 | -0.34 | 0.72 | BC019077       | Hs.17958       | FLJ11637       | hypothetical protein FLJ11637                                                      |
| 0.38 | -0.42 | 0.81 | BC001968       | Hs.150423      | CDK9           | cyclin-dependent kinase 9 (CDC2-related kinase)                                    |
| 0.38 | 0.12  | 0.26 | BC001676       | Hs.315177      | IFRD2          | interferon-related developmental regulator 2                                       |
| 0.38 | 0.32  | 0.06 | BC015932       | Hs.75470       | HSU84971       | fetal hypothetical protein                                                         |
| 0.38 | -0.57 | 0.95 | BC000022       | Hs.93523       | ZNF274         | zinc finger protein 274                                                            |
| 0.38 | 0.23  | 0.15 | BC003361       | Hs.184276      | SLC9A3R1       | solute carrier family 9 (sodium/hydrogen exchanger), isoform 3 regulatory factor 1 |
| 0.38 | 0.00  | 0.38 | BC010178       | Hs.78881       | POLL           | polymerase (DNA directed), lambda                                                  |
| 0.38 | -1.46 | 1.84 | BC002665       | Hs.1787        | LOC124220      | similar to common salivary protein 1                                               |
| 0.38 | 0.02  | 0.35 | BC009934       | Hs.68583       | LOC56961       | hypothetical protein from EUROIMAGE 2168212                                        |
| 0.38 | -0.66 | 1.04 | BC008909       | Hs.10177       | TCN2           | transcobalamin II; macrocytic anemia                                               |
| 0.38 | -0.19 | 0.57 | BC013201       | Hs.301920      | RAB3A          | RAB3A, member RAS oncogene family                                                  |
| 0.38 | -0.70 | 1.07 | BC014672       | Hs.6126        | HH114          | hypothetical protein HH114                                                         |
| 0.38 | -0.77 | 1.14 | BC008699       | Data not found | NA 4-14-03 333 |                                                                                    |
| 0.38 | -0.73 | 1.11 | BC015009       | Hs.78877       | FLJ14909       | hypothetical protein FLJ14909                                                      |
| 0.37 | -0.32 | 0.69 | BC006113       | Hs.127762      | EPHX2          | epoxide hydrolase 2, cytoplasmic                                                   |
| 0.37 | -0.14 | 0.51 | BC003168       | Hs.321622      | KIAA1042       | OGT(O-Glc-NAc transferase)-interacting protein 106 KDa                             |
| 0.37 | 0.26  | 0.11 | BC017449       | Hs.165998      | MIR16          | membrane interacting protein of RGS16                                              |
| 0.37 | 0.28  | 0.09 | BC010899       | Hs.36069       | HSPC230        | HSPC230 gene                                                                       |
| 0.37 | 0.05  | 0.33 | BC015817       | Hs.9452        | RTBDN          | retbindin                                                                          |
| 0.37 | -0.33 | 0.70 | BC002855       | Hs.8008        | REQ            | requiem, apoptosis response zinc finger gene                                       |
| 0.37 | -0.87 | 1.24 | BC005377       | Hs.79158       | ENTPD5         | ectonucleoside triphosphate diphosphohydrolase 5                                   |
| 0.37 | -0.78 | 1.16 | BC008958       | Hs.78040       | KDELRL1        | KDEL (Lys-Asp-Glu-Leu) endoplasmic reticulum protein retention receptor 1          |
| 0.37 | -0.60 | 0.97 | Data not found |                | JUP            | junction plakoglobin                                                               |
| 0.37 | -0.23 | 0.60 | Data not found |                | MGC4342        | hypothetical protein MGC4342                                                       |
| 0.37 | 0.05  | 0.32 | BC003559       | Hs.234726      | DKFZP564D0478  | hypothetical protein DKFZp564D0478                                                 |
| 0.37 | 0.18  | 0.19 | BC001671       | Hs.32826       | CGI-130        | CGI-130 protein                                                                    |
| 0.37 | -0.15 | 0.52 | BC000716       | Hs.144063      | SF3A2          | splicing factor 3a, subunit 2, 66kDa                                               |

|      |       |      |                |                      |                |                                                                                   |
|------|-------|------|----------------|----------------------|----------------|-----------------------------------------------------------------------------------|
| 0.37 | 0.32  | 0.05 | BC014645       | Hs.86172             | NDUFS5         | NADH dehydrogenase (ubiquinone) Fe-S protein 5, 15kDa (NADH-coenzyme Q reductase) |
| 0.37 | 0.00  | 0.37 | BC010146       | Hs.33787             | FLJ20574       | hypothetical protein FLJ20574                                                     |
| 0.37 | -0.55 | 0.92 | BC009084       | Hs.334841            | LOC90268       | hypothetical protein BC007706                                                     |
| 0.37 | -0.22 | 0.59 | BC003571       | Hs.416629            | SRC            | v-src sarcoma (Schmidt-Ruppin A-2) viral oncogene homolog (avian)                 |
| 0.37 | -0.15 | 0.52 | BC003130       | Hs.8015              | IGFBP4         | insulin-like growth factor binding protein 4                                      |
| 0.37 | -0.25 | 0.61 | BC001453       | Hs.26403             | GSTZ1          | glutathione transferase zeta 1 (maleylacetoacetate isomerase)                     |
| 0.37 | 0.29  | 0.07 | BC000076       | Hs.82932             | LYPLA2         | lysophospholipase II                                                              |
| 0.37 | -0.23 | 0.60 | BC012443       | Hs.30792             | HSPC126        | HSPC126 protein                                                                   |
| 0.37 | -0.13 | 0.50 | BC010444       | Hs.19368             | UCHL1          | ubiquitin carboxyl-terminal esterase L1 (ubiquitin thiolesterase)                 |
| 0.37 | -0.33 | 0.69 | BC004440       | Hs.11342             | LOC114987      | similar to spermatid WD-repeat protein                                            |
| 0.37 | 0.05  | 0.31 | BC010466       | In multiple clusters | FLJ20274       | hypothetical protein FLJ20274                                                     |
| 0.37 | -0.61 | 0.97 | BC001961       | Hs.10499             | AF1Q           | ALL1-fused gene from chromosome 1q                                                |
| 0.37 | 0.19  | 0.17 | BC013900       | Hs.268189            | POLH           | polymerase (DNA directed), eta                                                    |
| 0.37 | -0.48 | 0.84 | BC006306       | Hs.108779            | IK             | IK cytokine, down-regulator of HLA II                                             |
| 0.37 | -0.09 | 0.46 | BC002970       | Hs.10729             | MSI2           | musashi homolog 2 (Drosophila)                                                    |
| 0.36 | -0.02 | 0.39 | Data not found |                      | COCH           | coagulation factor C homolog, cochlin (Limulus polyphemus)                        |
| 0.36 | -0.66 | 1.02 | BC017088       | Hs.10283             | NAT5           | N-acetyltransferase 5 (ARD1 homolog, S. cerevisiae)                               |
| 0.36 | -0.49 | 0.86 | BC016790       | Hs.173042            | MGC15716       | hypothetical protein MGC15716                                                     |
| 0.36 | -0.56 | 0.92 | BC014974       | Data not found       | MAPKAPK3       | mitogen-activated protein kinase-activated protein kinase 3                       |
| 0.36 | -0.04 | 0.40 | BC006181       | Data not found       | NA 4-14-03 21  |                                                                                   |
| 0.36 | -1.34 | 1.70 | BC001937       | Hs.180903            | AIPL1          | aryl hydrocarbon receptor interacting protein-like 1                              |
| 0.36 | 0.02  | 0.35 | BC005387       | Hs.75313             | CXorf12        | chromosome X open reading frame 12                                                |
| 0.36 | -1.26 | 1.62 | BC015904       | Hs.347535            | PURB           | purine-rich element binding protein B                                             |
| 0.36 | -0.54 | 0.90 | BC006128       | Hs.98328             | BLNK           | B-cell linker                                                                     |
| 0.36 | -0.79 | 1.15 | BC006399       | Hs.155839            | LOC201853      | similar to hypothetical protein (L1H 3 region) - human                            |
| 0.36 | -1.36 | 1.72 | BC012561       | Hs.241531            | PEF            | PEF protein with a long N-terminal hydrophobic domain (peffin)                    |
| 0.36 | -0.04 | 0.40 | BC007778       | Data not found       | MRPL20         | mitochondrial ribosomal protein L20                                               |
| 0.36 | -0.11 | 0.47 | BC009610       | Hs.349506            | PC4            | activated RNA polymerase II transcription cofactor 4                              |
| 0.36 | -0.17 | 0.53 | BC014534       | Hs.94125             | FLJ11113       | methyl-CpG binding domain protein 5                                               |
| 0.36 | -0.33 | 0.69 | BC015773       | Hs.192822            | PLAT           | plasminogen activator, tissue                                                     |
| 0.36 | -1.53 | 1.89 | BC002960       | Hs.69745             | FLJ11184       | hypothetical protein FLJ11184                                                     |
| 0.36 | -0.20 | 0.56 | BC015191       | Hs.104741            | TOPK           | T-LAK cell-originated protein kinase                                              |
| 0.36 | -0.54 | 0.90 | BC002536       | Hs.99910             | MGC10993       | hypothetical protein MGC10993                                                     |
| 0.36 | -0.23 | 0.59 | BC002372       | Hs.62112             | ALDH9A1        | aldehyde dehydrogenase 9 family, member A1                                        |
| 0.36 | -0.60 | 0.95 | BC009424       | Hs.352397            | LOC122618      | hypothetical protein BC015003                                                     |
| 0.36 | -1.02 | 1.37 | BC009944       | Hs.157144            | MGC2731        | hypothetical protein MGC2731                                                      |
| 0.36 | -0.17 | 0.53 | BC010363       | Hs.105633            | FLJ10583       | WINS1 protein with Drosophila Lines (Lin) homologous domain                       |
| 0.36 | -0.67 | 1.03 | BC012535       | Hs.62354             | LRBA           | LPS-responsive vesicle trafficking, beach and anchor containing                   |
| 0.36 | 0.20  | 0.16 | BC009928       | Hs.4747              | HSPB7          | heat shock 27kDa protein family, member 7 (cardiovascular)                        |
| 0.36 | -1.35 | 1.70 | BC001261       | Hs.140944            | D6S2654E       | DNA segment on chromosome 6(unique) 2654 expressed sequence                       |
| 0.36 | -1.40 | 1.75 | BC017574       | Hs.24371             | MGC15668       | hypothetical protein MGC15668                                                     |
| 0.36 | -1.52 | 1.88 | BC001167       | Hs.79372             | EIF3S6         | eukaryotic translation initiation factor 3, subunit 6 48kDa                       |
| 0.36 | -0.69 | 1.05 | BC001364       | Hs.50785             | SEC22L1        | SEC22 vesicle trafficking protein-like 1 (S. cerevisiae)                          |
| 0.36 | -0.02 | 0.38 | BC017188       | Hs.226275            |                |                                                                                   |
| 0.35 | 0.19  | 0.16 | BC012358       | Hs.30570             | PRC1           | protein regulator of cytokinesis 1                                                |
| 0.35 | 0.21  | 0.15 | BC009046       | Hs.72981             | LCP2           | lymphocyte cytosolic protein 2 (SH2 domain containing leukocyte protein of 76kDa) |
| 0.35 | 0.26  | 0.10 | BC010900       | Hs.21275             | FLJ11011       | hypothetical protein FLJ11011                                                     |
| 0.35 | -0.34 | 0.69 | BC005045       | Hs.283007            | SNK            | serum-inducible kinase                                                            |
| 0.35 | -1.03 | 1.38 | BC002772       | Hs.274416            | NA 4-14-03 211 |                                                                                   |
| 0.35 | 0.33  | 0.02 | BC006231       | Hs.226573            | IKBKB          | inhibitor of kappa light polypeptide gene enhancer in B-cells, kinase beta        |
| 0.35 | -0.61 | 0.96 | BC000635       | Hs.166160            | GSTA2          | glutathione S-transferase A2                                                      |
| 0.35 | -0.25 | 0.60 | BC009769       | Hs.3576              | C20orf30       | chromosome 20 open reading frame 30                                               |
| 0.35 | 0.08  | 0.28 | BC012083       | Hs.21068             | DDX37          | DEAD/H (Asp-Glu-Ala-Asp/His) box polypeptide 37                                   |

|      |       |      |          |                      |              |                                                                               |
|------|-------|------|----------|----------------------|--------------|-------------------------------------------------------------------------------|
| 0.35 | 0.10  | 0.25 | BC004341 | Hs.69485             | CGI-63       | CGI-63 protein                                                                |
| 0.35 | 0.15  | 0.20 | BC005385 | Hs.74502             | SQLE         | squalene epoxidase                                                            |
| 0.35 | -0.28 | 0.63 | BC013643 | Hs.323512            | MGC15523     | hypothetical protein MGC15523                                                 |
| 0.35 | -0.53 | 0.88 | BC001462 | Hs.75799             | PRSS8        | protease, serine, 8 (prostasin)                                               |
| 0.35 | -0.70 | 1.05 | BC007315 | Hs.380963            | PDXK         | pyridoxal (pyridoxine, vitamin B6) kinase                                     |
| 0.35 | -0.25 | 0.60 | BC000105 | Hs.239760            | IMPA2        | inositol(myo)-1(or 4)-monophosphatase 2                                       |
| 0.35 | 0.33  | 0.02 | BC017339 | Hs.293691            | LAMR1        | laminin receptor 1 (ribosomal protein SA, 67kDa)                              |
| 0.35 | 0.33  | 0.02 | BC007821 | Hs.334525            | UBB          | ubiquitin B                                                                   |
| 0.35 | 0.16  | 0.19 | BC000408 | Hs.278544            | C5orf3       | chromosome 5 open reading frame 3                                             |
| 0.35 | -0.31 | 0.66 | BC011606 | Hs.172673            | SYNGR1       | synaptogyrin 1                                                                |
| 0.35 | -0.19 | 0.54 | BC017049 | Hs.249163            | ORC4L        | origin recognition complex, subunit 4-like (yeast)                            |
| 0.35 | 0.20  | 0.15 | BC006996 | Hs.21756             | FAM3D        | family with sequence similarity 3, member D                                   |
| 0.35 | -0.24 | 0.59 | BC007012 | Hs.64746             | LOC51061     | hypothetical protein LOC51061                                                 |
| 0.35 | -0.99 | 1.34 | BC001778 | Hs.78601             | HSPBAP1      | HSPB (heat shock 27kDa) associated protein 1                                  |
| 0.35 | -1.14 | 1.49 | BC014272 | Hs.57101             | ARHGAP9      | Rho GTPase activating protein 9                                               |
| 0.35 | -0.76 | 1.10 | BC005860 | Hs.326               | TARBP2       | TAR (HIV) RNA binding protein 2                                               |
| 0.35 | -0.05 | 0.40 | BC002899 | Hs.161362            | MGC1203      | hypothetical protein MGC1203                                                  |
| 0.35 | -0.43 | 0.78 | BC012926 | Hs.5366              | NDUFB8       | NADH dehydrogenase (ubiquinone) 1 beta subcomplex, 8, 19kDa                   |
| 0.35 | -1.95 | 2.30 | BC007965 | Hs.425808            | LOC132948    | LOC132948                                                                     |
| 0.35 | -1.00 | 1.34 | BC005924 | Hs.390278            | KIAA0153     | KIAA0153 protein                                                              |
| 0.35 | -0.51 | 0.86 | BC016009 | Hs.418650            | KCNK13       | potassium channel, subfamily K, member 13                                     |
| 0.35 | -0.75 | 1.10 | BC010235 | Hs.30773             | SSBP3        |                                                                               |
| 0.35 | 0.32  | 0.02 | BC000867 | Hs.6451              | PRO0659      | PRO0659 protein                                                               |
| 0.35 | -1.09 | 1.43 | BC011396 | Hs.98806             | PCYT2        | phosphate cytidyltransferase 2, ethanolamine                                  |
| 0.35 | -0.55 | 0.90 | BC001594 | Hs.5298              | TRIAD3       | TRIAD3 protein                                                                |
| 0.34 | -0.08 | 0.42 | BC000369 | Hs.107003            | HEI10        | enhancer of invasion 10                                                       |
| 0.34 | -0.36 | 0.71 | BC003008 | Hs.20930             | PCBP4        | poly(rC) binding protein 4                                                    |
| 0.34 | -0.05 | 0.40 | BC015109 | Hs.283693            | DKFZp727A071 | similar to tRNA synthetase class II                                           |
| 0.34 | -0.16 | 0.50 | BC015823 | Hs.105938            | LTF          | lactotransferrin                                                              |
| 0.34 | -0.09 | 0.43 | BC001220 | Hs.128764            | PSAP         | prosaposin (variant Gaucher disease and variant metachromatic leukodystrophy) |
| 0.34 | -1.32 | 1.67 | BC008070 | Hs.30026             | DGCR6L       | DiGeorge syndrome critical region gene 6-like                                 |
| 0.34 | -0.42 | 0.77 | BC007856 | Hs.380388            |              | Homo sapiens, clone IMAGE:4310290, mRNA                                       |
| 0.34 | -0.27 | 0.61 | BC004137 | Hs.3631              | IGBP1        | immunoglobulin (CD79A) binding protein 1                                      |
| 0.34 | -0.23 | 0.57 | BC002818 | In multiple clusters | CHRAC1       | chromatin accessibility complex 1                                             |
| 0.34 | 0.16  | 0.18 | BC014513 | Hs.101813            | WNT7A        | wingless-type MMTV integration site family, member 7A                         |
| 0.34 | -0.03 | 0.37 | BC002934 | Hs.289108            | HKE4         | HLA class II region expressed gene KE4                                        |
| 0.34 | 0.18  | 0.16 | BC003412 | Hs.9880              | PIIH         | peptidyl prolyl isomerase H (cyclophilin H)                                   |
| 0.34 | -0.29 | 0.63 | BC016952 | Hs.8867              | TRAP1        | heat shock protein 75                                                         |
| 0.34 | -0.25 | 0.59 | BC011924 | Hs.118261            | QARS         | glutaminyl-tRNA synthetase                                                    |
| 0.34 | -0.19 | 0.53 | BC012976 | Hs.44856             | POF1B        | premature ovarian failure 1B                                                  |
| 0.34 | -0.53 | 0.88 | BC006371 | Hs.47438             | KDELR2       | KDEL (Lys-Asp-Glu-Leu) endoplasmic reticulum protein retention receptor 2     |
| 0.34 | -1.52 | 1.86 | BC009312 | Hs.20725             | ADRM1        | adhesion regulating molecule 1                                                |
| 0.34 | -0.57 | 0.91 | BC009601 | Hs.75454             | PRDX3        | peroxiredoxin 3                                                               |
| 0.34 | 0.11  | 0.23 | BC007495 | Hs.208912            | MGC861       | hypothetical protein MGC861                                                   |
| 0.34 | -0.02 | 0.36 | BC012327 | Hs.252229            | PA2G4        |                                                                               |
| 0.34 | -2.61 | 2.95 | BC004973 | Hs.181015            | COL6A2       | collagen, type VI, alpha 2                                                    |
| 0.34 | -0.32 | 0.66 | BC005825 | Hs.38041             | GSTTLp28     | glutathione-S-transferase like; glutathione transferase omega                 |
| 0.34 | 0.25  | 0.09 | BC006838 | Hs.122579            | ECT2         | epithelial cell transforming sequence 2 oncogene                              |
| 0.34 | 0.04  | 0.30 | BC004291 | Hs.380439            | DNCI2        | dynein, cytoplasmic, intermediate polypeptide 2                               |
| 0.34 | -0.26 | 0.59 | BC018702 | Hs.233950            | SPINT1       | serine protease inhibitor, Kunitz type 1                                      |
| 0.34 | -2.00 | 2.34 | BC011539 | Hs.17908             | PSME1        | proteasome (prosome, macropain) activator subunit 1 (PA28 alpha)              |
| 0.34 | 0.29  | 0.04 | BC008729 | Hs.348262            | KIAA1309     | KIAA1309 protein                                                              |
| 0.34 | -0.71 | 1.05 | BC001179 | Hs.177516            | FPGS         | folylpolyglutamate synthase                                                   |

|      |       |      |          |                |                |                                                                                                                  |
|------|-------|------|----------|----------------|----------------|------------------------------------------------------------------------------------------------------------------|
| 0.34 | -0.83 | 1.17 | BC009340 | Data not found | C20orf108      | chromosome 20 open reading frame 108                                                                             |
| 0.34 | -1.07 | 1.40 | BC006298 | Hs.77039       | CLTA           | clathrin, light polypeptide (Lca)                                                                                |
| 0.34 | -0.42 | 0.76 | BC013115 | Hs.351478      | PSEN1          | presenilin 1 (Alzheimer disease 3)                                                                               |
| 0.34 | -0.83 | 1.17 | BC001256 | Hs.272299      | HEI10          | enhancer of invasion 10                                                                                          |
| 0.34 | -0.53 | 0.87 | BC010959 | Hs.77572       | BNIP1          | BCL2/adenovirus E1B 19kDa interacting protein 1                                                                  |
| 0.33 | -0.48 | 0.81 | BC001621 | Hs.334811      | CIP29          | cytokine induced protein 29 kDa                                                                                  |
| 0.33 | 0.28  | 0.05 | BC004457 | Hs.84045       | SLC1A7         | solute carrier family 1 (glutamate transporter), member 7                                                        |
| 0.33 | 0.13  | 0.20 | BC014894 | Data not found | FLJ23093       | chromosome 14 open reading frame 140                                                                             |
| 0.33 | -0.66 | 0.99 | BC000397 | Hs.202384      | T54            | T54 protein                                                                                                      |
| 0.33 | 0.05  | 0.28 | BC017061 | Hs.3363        | FLJ10450       | hypothetical protein FLJ10450                                                                                    |
| 0.33 | 0.13  | 0.20 | BC014665 | Hs.78989       | NA 4-14-03 448 |                                                                                                                  |
| 0.33 | 0.28  | 0.06 | BC015474 | Hs.238039      | IFNAR2         | interferon (alpha, beta and omega) receptor 2                                                                    |
| 0.33 | -1.15 | 1.48 | BC006475 | Hs.39504       | MGC4308        | hypothetical protein MGC4308                                                                                     |
| 0.33 | 0.31  | 0.02 | BC014455 | Hs.155595      | MESDC2         | mesoderm development candidate 2                                                                                 |
| 0.33 | -1.50 | 1.83 | BC008374 | Hs.432325      | PR48           | protein phosphatase 2A 48 kDa regulatory subunit                                                                 |
| 0.33 | -0.73 | 1.06 | BC013973 | Hs.184325      | TSSC3          | tumor suppressing subtransferable candidate 3                                                                    |
| 0.33 | 0.21  | 0.12 | BC011361 | Hs.169743      | PSMB7          | proteasome (prosome, macropain) subunit, beta type, 7                                                            |
| 0.33 | 0.18  | 0.15 | BC004361 | Hs.303091      | CCND1          | cyclin D1 (PRAD1: parathyroid adenomatosis 1)                                                                    |
| 0.33 | -0.21 | 0.54 | BC000274 | Hs.324618      | SRP9           | signal recognition particle 9kDa                                                                                 |
| 0.33 | 0.26  | 0.07 | BC000342 | Hs.174051      | SEMA4B         | sema domain, immunoglobulin domain (Ig), transmembrane domain (TM) and short cytoplasmic domain, (semaphorin) 4B |
| 0.33 | 0.05  | 0.28 | BC000504 | Hs.7043        | HDAC6          | histone deacetylase 6                                                                                            |
| 0.33 | 0.18  | 0.15 | BC019098 | Hs.1497        | MAP4           | microtubule-associated protein 4                                                                                 |
| 0.33 | -0.79 | 1.12 | BC002402 | Hs.240534      | AGPAT1         | 1-acylglycerol-3-phosphate O-acyltransferase 1 (lysophosphatidic acid acyltransferase, alpha)                    |
| 0.33 | -0.31 | 0.64 | BC013426 | Hs.111217      | ASNA1          | arsA arsenite transporter, ATP-binding, homolog 1 (bacterial)                                                    |
| 0.33 | -0.84 | 1.17 | BC012846 | Hs.11223       | STARD7         | START domain containing 7                                                                                        |
| 0.33 | -0.16 | 0.49 | BC017401 | Hs.123035      | LOC90120       | hypothetical gene supported by AK023162                                                                          |
| 0.33 | 0.00  | 0.33 | BC000021 | Hs.355264      | NA 4-14-03 422 |                                                                                                                  |
| 0.33 | -0.18 | 0.51 | BC017264 | Hs.124962      | SERF2          | small EDRK-rich factor 2                                                                                         |
| 0.33 | -0.08 | 0.41 | BC007714 | Hs.111244      | RAB6KIFL       | kinesin family member 20A                                                                                        |
| 0.33 | -0.41 | 0.74 | BC000777 | Hs.5301        | HYPK           | Huntingtin interacting protein K                                                                                 |
| 0.33 | -0.53 | 0.86 | BC003356 | Hs.282997      | GBA            | glucosidase, beta; acid (includes glucosylceramidase)                                                            |
| 0.33 | -0.64 | 0.97 | BC010992 | Hs.18878       | FLJ20605       | hypothetical protein FLJ20605                                                                                    |
| 0.33 | -0.27 | 0.60 | BC007783 | Hs.73817       | IGFBP7         | insulin-like growth factor binding protein 7                                                                     |
| 0.33 | -0.36 | 0.68 | BC000785 | Hs.274411      | FLJ22471       | limkain beta 2                                                                                                   |
| 0.33 | 0.23  | 0.09 | BC008781 | Hs.18029       | FLJ10204       | hypothetical protein FLJ10204                                                                                    |
| 0.33 | 0.03  | 0.29 | BC000395 | Hs.75884       | SMARCC2        | SWI/SNF related, matrix associated, actin dependent regulator of chromatin, subfamily c, member 2                |
| 0.33 | -0.44 | 0.77 | BC002482 | Hs.286261      | LGALS3BP       | lectin, galactoside-binding, soluble, 3 binding protein                                                          |
| 0.33 | 0.02  | 0.31 | BC001690 | Hs.177530      | ATP5E          | ATP synthase, H <sup>+</sup> transporting, mitochondrial F1 complex, epsilon subunit                             |
| 0.33 | -0.76 | 1.08 | BC006460 | Hs.15299       | HIS1           | HMBA-inducible                                                                                                   |
| 0.32 | -0.26 | 0.58 | BC015066 | Hs.153934      | CBFA2T2        | core-binding factor, runt domain, alpha subunit 2; translocated to, 2                                            |
| 0.32 | -2.26 | 2.58 | BC000182 | Hs.422986      | MGC2555        | hypothetical protein MGC2555                                                                                     |
| 0.32 | -0.75 | 1.08 | BC020107 | Hs.12457       | MGC19825       | similar to RIKEN cDNA 5630401J11                                                                                 |
| 0.32 | 0.15  | 0.18 | BC018992 | Hs.170171      | CARKL          | carbohydrate kinase-like                                                                                         |
| 0.32 | -0.59 | 0.92 | BC000349 | Hs.282997      | LOC51693       | unknown                                                                                                          |
| 0.32 | -0.05 | 0.38 | BC014469 | Hs.72901       | ANKH           | ankylosis, progressive homolog (mouse)                                                                           |
| 0.32 | -2.63 | 2.96 | BC018370 | Hs.12523       | CREB3          | cAMP responsive element binding protein 3 (luman)                                                                |
| 0.32 | 0.06  | 0.26 | BC014175 | Hs.159428      | DKFZP434A043   | DKFZP434A043 protein                                                                                             |
| 0.32 | -1.05 | 1.37 | BC009304 | Hs.65234       | PAM            | peptidylglycine alpha-amidating monooxygenase                                                                    |
| 0.32 | -1.26 | 1.58 | BC021214 | Hs.180900      | MGC13114       | hypothetical protein MGC13114                                                                                    |
| 0.32 | -1.80 | 2.12 | BC000414 | Hs.99843       | CBS            | cystathionine-beta-synthase                                                                                      |

|      |       |      |           |                |           |                                                                                          |
|------|-------|------|-----------|----------------|-----------|------------------------------------------------------------------------------------------|
| 0.32 | -0.02 | 0.34 | BC007449  | Hs.127685      | KIAA1627  | KIAA1627 protein                                                                         |
| 0.32 | 0.12  | 0.20 | BC010117  | Hs.158515      | BTC       | betacellulin                                                                             |
| 0.32 | -0.47 | 0.79 | BC001334  | Hs.82520       | POLD4     | polymerase (DNA-directed), delta 4                                                       |
| 0.32 | -1.25 | 1.56 | BC008493  | Hs.1852        | Apg4B     | KIAA0943 protein                                                                         |
| 0.32 | -0.90 | 1.22 | BC002338  | Hs.73722       | NCPB2     | nuclear cap binding protein subunit 2, 20kDa                                             |
| 0.32 | 0.02  | 0.29 | BC000286  | Hs.150748      | EIF3S4    | eukaryotic translation initiation factor 3, subunit 4 delta, 44kDa                       |
| 0.32 | -0.25 | 0.57 | BC013033  | Hs.184691      | CPZ       | carboxypeptidase Z                                                                       |
| 0.32 | -0.15 | 0.47 | BC014416  | Hs.285176      | MLC-B     | myosin regulatory light chain                                                            |
| 0.32 | -0.33 | 0.64 | NM_018383 | Hs.107000      | FLJ11294  | hypothetical protein FLJ11294                                                            |
| 0.32 | -1.05 | 1.37 | BC020521  | Hs.250705      | GADD45A   | growth arrest and DNA-damage-inducible, alpha                                            |
| 0.32 | -0.31 | 0.63 | BC003366  | Hs.92198       | CARHSP1   | calcium regulated heat stable protein 1, 24kDa                                           |
| 0.32 | -1.49 | 1.81 | BC005155  | Hs.252280      | TREX1     | three prime repair exonuclease 1                                                         |
| 0.32 | -1.05 | 1.37 | BC007957  | Hs.28393       | LOC115131 | similar to POSSIBLE GUSTATORY RECEPTOR CLONE PTE01                                       |
| 0.32 | -0.13 | 0.45 | BC007677  | Hs.83530       | FLJ20811  | hypothetical protein FLJ20811                                                            |
| 0.32 | -0.70 | 1.01 | BC004152  | Hs.5199        | HSPC150   | HSPC150 protein similar to ubiquitin-conjugating enzyme                                  |
| 0.31 | -0.52 | 0.83 | BC006534  | Hs.50550       | NESCA     | RUN and SH3 domain containing 1                                                          |
| 0.31 | -0.74 | 1.05 | BC011812  | Hs.7960        | RPPN      | ropporin, rhophilin associated protein 1                                                 |
| 0.31 | -0.80 | 1.12 | BC004873  | Hs.79507       | CNOT2     | CCR4-NOT transcription complex, subunit 2                                                |
| 0.31 | -1.89 | 2.20 | BC005827  | Hs.2178        | GNAT2     | guanine nucleotide binding protein (G protein), alpha transducing activity polypeptide 2 |
| 0.31 | 0.26  | 0.06 | BC016039  | Hs.279914      | UQCRH     | ubiquinol-cytochrome c reductase hinge protein                                           |
| 0.31 | -1.05 | 1.36 | BC003055  | Hs.238928      | BTD       | biotinidase                                                                              |
| 0.31 | -0.15 | 0.47 | BC018503  | Hs.2025        | PTPN2     | protein tyrosine phosphatase, non-receptor type 2                                        |
| 0.31 | 0.16  | 0.15 | BC008191  | Hs.7984        | PSCD3     | pleckstrin homology, Sec7 and coiled/coil domains 3                                      |
| 0.31 | 0.00  | 0.31 | BC001401  | Hs.115175      | ZAK       | sterile alpha motif and leucine zipper containing kinase AZK                             |
| 0.31 | -1.07 | 1.38 | BC014889  | Hs.13495       | DMAP1     | DNA methyltransferase 1-associated protein 1                                             |
| 0.31 | -0.90 | 1.21 | BC004141  | Hs.75335       | GATM      | glycine amidinotransferase (L-arginine:glycine amidinotransferase)                       |
| 0.31 | -0.58 | 0.90 | BC020967  | Hs.150555      | ATP5E     | ATP synthase, H <sup>+</sup> transporting, mitochondrial F1 complex, epsilon subunit     |
| 0.31 | -1.12 | 1.43 | BC014310  | Hs.308332      | FLJ10305  | hypothetical protein FLJ10305                                                            |
| 0.31 | 0.00  | 0.31 | BC017565  | Hs.119177      | ATP1B1    | ATPase, Na <sup>+</sup> /K <sup>+</sup> transporting, beta 1 polypeptide                 |
| 0.31 | 0.10  | 0.21 | BC022881  | Hs.369550      | PSMB4     | proteasome (prosome, macropain) subunit, beta type, 4                                    |
| 0.31 | -0.10 | 0.41 | BC015775  | Hs.75852       | MAGEA8    | melanoma antigen, family A, 8                                                            |
| 0.31 | -0.48 | 0.79 | BC011786  | Data not found | ARP3BETA  | actin-related protein 3-beta                                                             |
| 0.31 | -0.85 | 1.16 | BC000151  | Hs.10729       | HSPC117   | hypothetical protein HSPC117                                                             |
| 0.31 | 0.15  | 0.16 | BC009264  | Hs.192728      | KIAA1720  | KIAA1720 protein                                                                         |
| 0.31 | -0.55 | 0.86 | BC021217  | Hs.59745       | NDUFV3    | NADH dehydrogenase (ubiquinone) flavoprotein 3, 10kDa                                    |
| 0.31 | -0.59 | 0.90 | BC005013  | Hs.106004      | FLJ10350  | hypothetical protein FLJ10350                                                            |
| 0.31 | -0.31 | 0.61 | BC006107  | Hs.19807       | MCM2      | MCM2 minichromosome maintenance deficient 2, mitotin (S. cerevisiae)                     |
| 0.31 | -0.28 | 0.58 | BC010737  | Data not found | C22orf3   | chromosome 22 open reading frame 3                                                       |
| 0.31 | 0.06  | 0.25 | BC000075  | Hs.251064      | CKB       | creatine kinase, brain                                                                   |
| 0.31 | -0.71 | 1.01 | BC007654  | Hs.21943       | NIF3L1    | NIF3 NGG1 interacting factor 3-like 1 (S. pombe)                                         |
| 0.31 | 0.17  | 0.13 | BC011889  | Hs.334639      | RNF32     | ring finger protein 32                                                                   |
| 0.31 | -0.64 | 0.95 | BC004537  | Hs.389107      | ATP6V0C   | ATPase, H <sup>+</sup> transporting, lysosomal 16kDa, V0 subunit c                       |
| 0.31 | -0.56 | 0.87 | BC001871  | Hs.184062      | EFEMP1    | EGF-containing fibulin-like extracellular matrix protein 1                               |
| 0.31 | -0.02 | 0.33 | BC021165  | Hs.158210      | HSPCB     | heat shock 90kDa protein 1, beta                                                         |
| 0.31 | -1.12 | 1.43 | BC011983  | Hs.381179      | UBL5      | ubiquitin-like 5                                                                         |
| 0.31 | -0.40 | 0.71 | BC018891  | Data not found | MGC13071  | hypothetical protein MGC13071                                                            |
| 0.31 | -0.52 | 0.82 | BC005185  | Hs.234896      | PP2447    | hypothetical protein PP2447                                                              |
| 0.30 | -0.86 | 1.16 | BC000759  | Hs.24563       | NXT1      | NTF2-like export factor 1                                                                |
| 0.30 | -1.05 | 1.36 | BC014356  | Hs.283693      | PELO      | pelota homolog (Drosophila)                                                              |
| 0.30 | -0.34 | 0.65 | BC015926  | Hs.48924       | CITED1    | Cbp/p300-interacting transactivator, with Glu/Asp-rich carboxy-terminal domain, 1        |
| 0.30 | 0.22  | 0.08 | BC012826  | Hs.274351      | SNRPN     | small nuclear ribonucleoprotein polypeptide N                                            |
| 0.30 | 0.26  | 0.05 | BC002454  | Hs.71642       | PSA       | phosphoserine aminotransferase                                                           |
| 0.30 | -0.53 | 0.83 | BC012613  | Hs.646         | CPA3      | carboxypeptidase A3 (mast cell)                                                          |

|      |       |      |                |                |                |                                                                                 |
|------|-------|------|----------------|----------------|----------------|---------------------------------------------------------------------------------|
| 0.30 | 0.02  | 0.28 | BC010922       | Hs.142245      | HHLA3          | HERV-H LTR-associating 3                                                        |
| 0.30 | 0.24  | 0.07 | BC021226       | Hs.19122       | EIF4EL3        | eukaryotic translation initiation factor 4E-like 3                              |
| 0.30 | 0.20  | 0.10 | BC000944       | Hs.15580       | LENG5          | leukocyte receptor cluster (LRC) member 5                                       |
| 0.30 | 0.09  | 0.21 | BC019040       | Hs.103724      | GEMIN7         | gem (nuclear organelle) associated protein 7                                    |
| 0.30 | -1.05 | 1.35 | BC000819       | Hs.180378      | LOC56267       | hypothetical protein 669                                                        |
| 0.30 | -0.96 | 1.26 | BC009614       | Hs.6783        | MXD4           | MAX dimerization protein 4                                                      |
| 0.30 | -0.23 | 0.54 | BC009051       | Data not found | CSTF2          | cleavage stimulation factor, 3' pre-RNA, subunit 2, 64kDa                       |
| 0.30 | -1.29 | 1.59 | BC005158       | Hs.89072       | NA 4-14-03 137 |                                                                                 |
| 0.30 | 0.11  | 0.19 | BC014666       | Hs.187520      | NRP2           | neuropilin 2                                                                    |
| 0.30 | 0.26  | 0.04 | BC014457       | Hs.54609       | LOC151194      | similar to hepatocellular carcinoma-associated antigen HCA557b                  |
| 0.30 | -1.02 | 1.33 | BC005050       | Hs.191460      | HSD17B12       | hydroxysteroid (17-beta) dehydrogenase 12                                       |
| 0.30 | -0.23 | 0.53 | Data not found |                | CGI-18         | CGI-18 protein                                                                  |
| 0.30 | -1.84 | 2.14 | BC003061       | Hs.18069       | MDS032         | uncharacterized hematopoietic stem/progenitor cells protein MDS032              |
| 0.30 | -0.47 | 0.77 | BC015947       | Hs.47584       | BCAT2          | branched chain aminotransferase 2, mitochondrial                                |
| 0.30 | -0.30 | 0.60 | BC000706       | Hs.109798      | FLJ20847       | hypothetical protein FLJ20847                                                   |
| 0.30 | -0.72 | 1.02 | BC008849       | Data not found | ACY1           | aminoacylase 1                                                                  |
| 0.30 | 0.22  | 0.08 | BC012051       | Hs.234282      | MUTYH          | mutY homolog (E. coli)                                                          |
| 0.30 | 0.19  | 0.11 | BC000373       | Hs.279518      | SPUVE          | protease, serine, 23                                                            |
| 0.30 | 0.15  | 0.14 | BC001210       | Hs.12851       | PPIA           | peptidylprolyl isomerase A (cyclophilin A)                                      |
| 0.30 | -0.46 | 0.76 | BC001340       | Hs.12293       | FLJ21103       | hypothetical protein FLJ21103                                                   |
| 0.30 | -1.04 | 1.34 | BC000234       | Hs.364345      | TAF9           | TAF9 RNA polymerase II, TATA box binding protein (TBP)-associated factor, 32kDa |
| 0.30 | -0.27 | 0.57 | BC000430       | Hs.75824       | NA 4-14-03 177 |                                                                                 |
| 0.30 | -0.71 | 1.00 | BC004368       | Hs.433810      | NPC2           | Niemann-Pick disease, type C2                                                   |
| 0.30 | -2.62 | 2.92 | BC004217       | Hs.105547      | LOC112970      | hypothetical protein BC012173                                                   |
| 0.30 | -0.27 | 0.57 | BC002820       | Hs.272018      | ALTE           | Ac-like transposable element                                                    |
| 0.30 | -2.82 | 3.12 | BC008095       | Hs.333417      | MGC21636       | hypothetical protein MGC21636                                                   |
| 0.30 | -0.13 | 0.42 | BC012305       | Hs.333417      | MARK4          | MAP/microtubule affinity-regulating kinase 4                                    |
| 0.30 | 0.16  | 0.14 | BC009470       | Hs.18571       | SCAMP3         | secretory carrier membrane protein 3                                            |
| 0.30 | -1.31 | 1.60 | BC008337       | Hs.272838      | C11orf10       | chromosome 11 open reading frame 10                                             |
| 0.30 | -0.17 | 0.47 | BC007116       | Hs.334568      | P3             | Protein P3                                                                      |
| 0.30 | -0.10 | 0.40 | BC005210       | Hs.26570       | CABYR          | calcium-binding tyrosine-(Y)-phosphorylation regulated (fibrousheathin 2)       |
| 0.29 | -2.07 | 2.36 | BC011405       | Hs.23650       | PDHA1          | pyruvate dehydrogenase (lipoamide) alpha 1                                      |
| 0.29 | 0.00  | 0.30 | BC008767       | Hs.379991      | TCN2           | transcobalamin II; macrocytic anemia                                            |
| 0.29 | 0.06  | 0.23 | BC018409       | Hs.150319      | CGI-60         | CGI-60 protein                                                                  |
| 0.29 | 0.19  | 0.11 | BC008323       | Hs.173724      | LOC51234       | hypothetical protein LOC51234                                                   |
| 0.29 | -0.43 | 0.73 | BC006566       | Hs.9599        | ACTR1B         | ARP1 actin-related protein 1 homolog B, cetractin beta (yeast)                  |
| 0.29 | -1.19 | 1.49 | BC009388       | Data not found | IL6            | interleukin 6 (interferon, beta 2)                                              |
| 0.29 | -0.47 | 0.77 | BC014501       | Data not found | MTA1           | metastasis associated 1                                                         |
| 0.29 | -1.13 | 1.42 | BC015768       | Hs.285115      | STARD7         | START domain containing 7                                                       |
| 0.29 | 0.19  | 0.10 | BC006114       | Hs.89605       | CSRP2BP        | CSRP2 binding protein                                                           |
| 0.29 | 0.13  | 0.16 | BC009471       | Hs.128749      | HNRPAB         | heterogeneous nuclear ribonucleoprotein A/B                                     |
| 0.29 | -0.11 | 0.40 | BC007674       | Hs.375108      | LSM1           | LSM1 homolog, U6 small nuclear RNA associated (S. cerevisiae)                   |
| 0.29 | 0.13  | 0.16 | BC016325       | Hs.75290       | HADH2          | hydroxyacyl-Coenzyme A dehydrogenase, type II                                   |
| 0.29 | -0.65 | 0.94 | BC010965       | Hs.28988       | GLRX           | glutaredoxin (thioltransferase)                                                 |
| 0.29 | -0.79 | 1.08 | BF313143       | Hs.318456      | IDH3B          | isocitrate dehydrogenase 3 (NAD+) beta                                          |
| 0.29 | -0.17 | 0.46 | BC008364       | Hs.418901      | HNRPC          | heterogeneous nuclear ribonucleoprotein C (C1/C2)                               |
| 0.29 | 0.18  | 0.11 | BC003385       | Hs.129951      | SPOP           | speckle-type POZ protein                                                        |
| 0.29 | -0.77 | 1.06 | BC000590       | Hs.83583       | SF1            | splicing factor 1                                                               |
| 0.29 | -0.47 | 0.76 | BC009396       | Hs.288891      | SQRDL          | sulfide quinone reductase-like (yeast)                                          |
| 0.29 | 0.16  | 0.13 | BC020584       | Hs.25307       | PIGO           | phosphatidylinositol glycan class O                                             |
| 0.29 | -1.58 | 1.87 | BC001959       | Hs.7862        | RPS2           | ribosomal protein S2                                                            |
| 0.29 | -0.40 | 0.69 | BC000498       | Hs.597         | KIAA1036       | KIAA1036 protein                                                                |
| 0.29 | -0.46 | 0.74 | BC014844       | Hs.118640      | UQCR           | ubiquinol-cytochrome c reductase (6.4kD) subunit                                |

|      |       |      |           |                      |          |                                                                                                                  |
|------|-------|------|-----------|----------------------|----------|------------------------------------------------------------------------------------------------------------------|
| 0.29 | -0.42 | 0.70 | BC009856  | Hs.12045             | CEACAM1  | carcinoembryonic antigen-related cell adhesion molecule 1 (biliary glycoprotein)                                 |
| 0.29 | -0.68 | 0.97 | BC012855  | Hs.125201            | ALB      | albumin                                                                                                          |
| 0.29 | -0.74 | 1.03 | BC005233  | Hs.73923             | CRADD    | CASP2 and RIPK1 domain containing adaptor with death domain                                                      |
| 0.29 | 0.04  | 0.25 | BC005397  | Hs.55408             | SNX7     | sorting nexin 7                                                                                                  |
| 0.29 | -0.76 | 1.05 | BC005920  | Data not found       |          |                                                                                                                  |
| 0.29 | 0.05  | 0.24 | BC006294  | Data not found       | DLG7     | discs, large homolog 7 (Drosophila)                                                                              |
| 0.29 | 0.09  | 0.19 | BC007408  | Hs.143641            | MGC3121  | hypothetical protein MGC3121                                                                                     |
| 0.29 | -0.46 | 0.74 | BC008417  | In multiple clusters | NALP2    | NALP2 protein                                                                                                    |
| 0.29 | 0.24  | 0.04 | BC004973  | Hs.181015            | LAT      | linker for activation of T cells                                                                                 |
| 0.29 | -0.68 | 0.97 | BC001251  | Hs.80426             | BRE      | brain and reproductive organ-expressed (TNFRSF1A modulator)                                                      |
| 0.29 | -1.66 | 1.95 | BC019246  | Hs.195155            | NR1H3    | nuclear receptor subfamily 1, group H, member 3                                                                  |
| 0.29 | 0.07  | 0.22 | BC015998  | Hs.82906             | CDC34    | cell division cycle 34                                                                                           |
| 0.29 | -1.15 | 1.43 | BC009439  | Hs.182986            | PACE-1   | ezrin-binding partner PACE-1                                                                                     |
| 0.29 | -0.57 | 0.86 | BC007704  | Hs.381183            | MDH1     | malate dehydrogenase 1, NAD (soluble)                                                                            |
| 0.29 | -1.51 | 1.79 | BC001716  | Hs.396644            | ZNF323   | zinc finger protein 323                                                                                          |
| 0.29 | -0.32 | 0.61 | NM_018474 | Hs.173515            | FLJ14779 | hypothetical protein FLJ14779                                                                                    |
| 0.29 | -0.76 | 1.05 | BC010953  | Hs.91161             | PFDN4    | prefoldin 4                                                                                                      |
| 0.29 | -0.34 | 0.62 | BC021224  | In multiple clusters | Magmas   | mitochondria-associated protein involved in granulocyte-macrophage colony-stimulating factor signal transduction |
| 0.28 | -0.16 | 0.44 | BC002851  | Hs.429437            | FLJ32915 | hypothetical protein FLJ32915                                                                                    |
| 0.28 | -1.64 | 1.92 | BC015517  | Hs.302008            | SLC27A4  | solute carrier family 27 (fatty acid transporter), member 4                                                      |
| 0.28 | -0.15 | 0.43 | BC017066  | Hs.6614              | RNF40    | ring finger protein 40                                                                                           |
| 0.28 | -0.41 | 0.69 | BC009348  | Hs.151001            | CES1     | carboxylesterase 1 (monocyte/macrophage serine esterase 1)                                                       |
| 0.28 | -1.52 | 1.80 | BC004885  | Hs.272299            | ABCB6    | ATP-binding cassette, sub-family B (MDR/TAP), member 6                                                           |
| 0.28 | -0.77 | 1.06 | BC000320  | Hs.5790              | SCAMP-4  | secretory carrier membrane protein 4                                                                             |
| 0.28 | -0.05 | 0.33 | BC020987  | Hs.78442             | IMPA1    | inositol(myo)-1(or 4)-monophosphatase 1                                                                          |
| 0.28 | -0.64 | 0.93 | BC000049  | Hs.279610            | M17S2    | membrane component, chromosome 17, surface marker 2 (ovarian carcinoma antigen CA125)                            |
| 0.28 | -0.25 | 0.53 | BC002781  | Hs.76122             | SHAPY    | Ca <sup>2+</sup> -dependent endoplasmic reticulum nucleoside diphosphatase                                       |
| 0.28 | -0.51 | 0.79 | BC017352  | Hs.82237             | CLCN7    | chloride channel 7                                                                                               |
| 0.28 | -0.04 | 0.33 | BC007591  | Hs.227789            | XRCC4    | X-ray repair complementing defective repair in Chinese hamster cells 4                                           |
| 0.28 | 0.02  | 0.26 | BC018145  | Hs.19523             | TPMT     | thiopurine S-methyltransferase                                                                                   |
| 0.28 | 0.00  | 0.28 | BC002711  | Hs.146409            | C20orf64 | chromosome 20 open reading frame 64                                                                              |
| 0.28 | -0.14 | 0.42 | BC007065  | Hs.77490             | LOC90693 | alpha-1,3(6)-mannosylglycoprotein beta-1,6-N-acetyl-glucosaminyltransferase-like                                 |
| 0.28 | 0.12  | 0.16 | BC002918  | Hs.25204             | PEA15    | phosphoprotein enriched in astrocytes 15                                                                         |
| 0.28 | -0.54 | 0.82 | BC005388  | Hs.55055             | FAAH     | fatty acid hydroxylase                                                                                           |
| 0.28 | -0.03 | 0.31 | BC010147  | Hs.389107            | MGC21874 | hypothetical protein MGC21874                                                                                    |
| 0.28 | 0.08  | 0.20 | BC017270  | Hs.250175            | UAP1     | UDP-N-acetylglucosamine pyrophosphorylase 1                                                                      |
| 0.28 | -0.88 | 1.16 | BC006849  | Hs.19574             | MGC5469  | THO complex 3                                                                                                    |
| 0.28 | -1.07 | 1.35 | BC016850  | Hs.261023            | MCM7     | MCM7 minichromosome maintenance deficient 7 (S. cerevisiae)                                                      |
| 0.28 | -0.22 | 0.49 | BC013311  | Hs.25682             | ZAP128   | peroxisomal long-chain acyl-coA thioesterase                                                                     |
| 0.28 | -2.33 | 2.61 | BC002568  | Hs.4900              | LOC57019 | hypothetical protein LOC57019                                                                                    |
| 0.28 | -0.61 | 0.89 | BC008982  | Hs.2161              | MAGEA9   | melanoma antigen, family A, 9                                                                                    |
| 0.28 | 0.06  | 0.21 | BC009179  | Hs.15277             | UBE2D1   | ubiquitin-conjugating enzyme E2D 1 (UBC4/5 homolog, yeast)                                                       |
| 0.28 | -0.43 | 0.70 | BC008380  | Hs.286145            | NMU      | neuromedin U                                                                                                     |
| 0.28 | 0.14  | 0.14 | BC002403  | Hs.79339             | CHI3L2   | chitinase 3-like 2                                                                                               |
| 0.28 | -0.08 | 0.36 | BC002905  | Hs.24998             | RPL39    | ribosomal protein L39                                                                                            |
| 0.28 | -0.12 | 0.40 | BC001493  | Hs.241489            | LOC90678 | hypothetical protein BC009239                                                                                    |
| 0.28 | -0.27 | 0.54 | BC005084  | Hs.29874             | QPRT     | quinolate phosphoribosyltransferase (nicotinate-nucleotide pyrophosphorylase (carboxylating))                    |
| 0.28 | -0.65 | 0.92 | BC011180  | Hs.124942            | SH3YL1   | likely ortholog of mouse Sh3 domain YSC-like 1                                                                   |
| 0.27 | -0.10 | 0.37 | BC014014  | Hs.169992            | MCM3     | MCM3 minichromosome maintenance deficient 3 (S. cerevisiae)                                                      |
| 0.27 | -0.16 | 0.43 | BC009217  | Hs.337557            | CGI-10   | coenzyme Q6 homolog (yeast)                                                                                      |
| 0.27 | -0.49 | 0.76 | BC012787  | Hs.180895            | SIMP     | source of immunodominant MHC-associated peptides                                                                 |
| 0.27 | 0.02  | 0.25 | BC003000  | Hs.79748             | BIRC5    | baculoviral IAP repeat-containing 5 (survivin)                                                                   |

|      |       |      |           |                |                |                                                                                                    |
|------|-------|------|-----------|----------------|----------------|----------------------------------------------------------------------------------------------------|
| 0.27 | -0.87 | 1.14 | BC015831  | Hs.88646       | COG4           | component of oligomeric golgi complex 4                                                            |
| 0.27 | 0.06  | 0.21 | BC009078  | Data not found | LOC136895      | hypothetical protein BC015397                                                                      |
| 0.27 | 0.18  | 0.09 | BC011981  | Hs.110407      | COL4A6         | collagen, type IV, alpha 6                                                                         |
| 0.27 | -0.60 | 0.87 | BC009428  | Hs.423968      | MGC10200       | hypothetical protein MGC:10200                                                                     |
| 0.27 | -0.36 | 0.63 | BC005271  | Hs.19236       | NAT1           | N-acetyltransferase 1 (arylamine N-acetyltransferase)                                              |
| 0.27 | -0.32 | 0.59 | BC014946  | Hs.321653      | VIT1           |                                                                                                    |
| 0.27 | -0.69 | 0.96 | BC004553  | Hs.103755      | DKFZP566C243   | DKFZP566C243 protein                                                                               |
| 0.27 | -0.56 | 0.83 | BC001023  | Hs.318720      | HSPC219        | Nef associated protein 1                                                                           |
| 0.27 | -0.89 | 1.16 | BC011566  | Hs.198298      | POU2F1         | POU domain, class 2, transcription factor 1                                                        |
| 0.27 | -0.28 | 0.55 | BC000306  | Hs.8110        | ATP6V1E2       | ATPase, H <sup>+</sup> transporting, lysosomal 31kDa, V1 subunit E isoform 2                       |
| 0.27 | -1.19 | 1.46 | BC001635  | Hs.429621      | PPP1CC         | protein phosphatase 1, catalytic subunit, gamma isoform                                            |
| 0.27 | -0.85 | 1.12 | BC017193  | Hs.283655      | CCND1          | cyclin D1 (PRAD1: parathyroid adenomatosis 1)                                                      |
| 0.27 | -0.88 | 1.15 | BC000052  | Hs.998         | C1orf15        | chromosome 1 open reading frame 15                                                                 |
| 0.27 | -0.83 | 1.10 | BC004561  | Hs.81361       | AMACR          | alpha-methylacyl-CoA racemase                                                                      |
| 0.27 | -0.72 | 0.99 | BC014785  | Hs.692         | NME7           | non-metastatic cells 7, protein expressed in (nucleoside-diphosphate kinase)                       |
| 0.27 | -0.05 | 0.32 | BC011579  | Hs.321214      | SERPINA3       | serine (or cysteine) proteinase inhibitor, clade A (alpha-1 antiproteinase, antitrypsin), member 3 |
| 0.27 | -1.03 | 1.30 | BC010708  | Hs.241503      | 384D8-2        | hypothetical protein 384D8_6                                                                       |
| 0.27 | -0.41 | 0.68 | BC001899  | Hs.46328       | PMPCB          | peptidase (mitochondrial processing) beta                                                          |
| 0.27 | -0.77 | 1.04 | BC005312  | Hs.318720      | STAF42         | SPT3-associated factor 42                                                                          |
| 0.27 | -0.47 | 0.73 | BC010221  | Hs.16986       | STRAIT11499    | hypothetical protein STRAIT11499                                                                   |
| 0.27 | -1.20 | 1.46 | BC011375  | Hs.23106       | RGS19IP1       | regulator of G-protein signalling 19 interacting protein 1                                         |
| 0.27 | -0.82 | 1.08 | BC007873  | Hs.278426      |                | Homo sapiens, clone IMAGE:4829271, mRNA                                                            |
| 0.27 | -0.42 | 0.68 | BC005002  | Hs.152738      | ZNF358         | zinc finger protein 358                                                                            |
| 0.27 | -0.90 | 1.16 | BC008198  | Hs.129445      | SLC30A5        | solute carrier family 30 (zinc transporter), member 5                                              |
| 0.27 | -0.34 | 0.61 | BC002791  | Hs.356137      | FLJ13855       | hypothetical protein FLJ13855                                                                      |
| 0.27 | 0.14  | 0.13 | BC012741  | Hs.7104        | FLJ12783       | ionized calcium binding adapter molecule 2                                                         |
| 0.27 | -0.22 | 0.49 | BC012797  | Hs.16232       | BIN3           | bridging integrator 3                                                                              |
| 0.27 | 0.23  | 0.04 | BC013327  | Hs.17287       | KCNJ15         | potassium inwardly-rectifying channel, subfamily J, member 15                                      |
| 0.27 | 0.09  | 0.17 | BC000165  | Hs.78902       | VDAC2          | voltage-dependent anion channel 2                                                                  |
| 0.26 | -0.45 | 0.71 | BC012191  | Hs.375206      | MRPS12         | mitochondrial ribosomal protein S12                                                                |
| 0.26 | -0.09 | 0.35 | BC015764  | Hs.25895       | NA 4-14-03 8   |                                                                                                    |
| 0.26 | -1.81 | 2.08 | NM_001715 | Hs.2243        | VDAC3          | voltage-dependent anion channel 3                                                                  |
| 0.26 | 0.16  | 0.10 | BC005349  | Hs.2265        | BDH            | 3-hydroxybutyrate dehydrogenase (heart, mitochondrial)                                             |
| 0.26 | -1.08 | 1.34 | BC008608  | Hs.14144       | ARD1           | ARD1 homolog, N-acetyltransferase ( <i>S. cerevisiae</i> )                                         |
| 0.26 | -1.12 | 1.38 | BC003097  | Hs.433303      | MDS032         | uncharacterized hematopoietic stem/progenitor cells protein MDS032                                 |
| 0.26 | -0.52 | 0.78 | BC015562  | Hs.94814       | BAG3           | BCL2-associated athanogene 3                                                                       |
| 0.26 | -0.60 | 0.86 | BC001934  | Hs.73818       | ZNF232         | zinc finger protein 232                                                                            |
| 0.26 | 0.11  | 0.16 | BC019235  | Hs.153261      | EMD            | emerin (Emery-Dreifuss muscular dystrophy)                                                         |
| 0.26 | 0.23  | 0.04 | BC000437  | Hs.90744       | KRT8           | keratin 8                                                                                          |
| 0.26 | -0.99 | 1.26 | BC007061  | Hs.1340        | NA 4-14-03 235 |                                                                                                    |
| 0.26 | -1.08 | 1.34 | BC010846  | Hs.16229       | MGC4170        | MGC4170 protein                                                                                    |
| 0.26 | 0.18  | 0.09 | BC013002  | Hs.73999       | EXTL3          | exostoses (multiple)-like 3                                                                        |
| 0.26 | -0.88 | 1.14 | BC016148  | Hs.239625      | FAAH           | fatty acid hydroxylase                                                                             |
| 0.26 | 0.06  | 0.21 | BC016927  | Hs.12835       | MGC17337       | similar to RIKEN cDNA 5730528L13 gene                                                              |
| 0.26 | -1.02 | 1.28 | BC000887  | Hs.26813       | PGD            | phosphogluconate dehydrogenase                                                                     |
| 0.26 | -1.81 | 2.07 | BC002787  | Hs.227782      | LOC147632      | hypothetical protein BC010734                                                                      |
| 0.26 | -0.21 | 0.47 | BC005843  | Hs.30002       | CINP           | cyclin-dependent kinase 2-interacting protein                                                      |
| 0.26 | 0.18  | 0.08 | BC016452  | Hs.6780        | NA 4-14-03 395 |                                                                                                    |
| 0.26 | -0.76 | 1.02 | BC007726  | Hs.26516       | DKFZP586M1523  | DKFZP586M1523 protein                                                                              |
| 0.26 | -0.35 | 0.61 | BC012398  | Data not found | DKFZP564G2022  | DKFZP564G2022 protein                                                                              |
| 0.26 | -0.95 | 1.21 | BC015883  | Hs.334842      | WAC            | WW domain-containing adapter with a coiled-coil region                                             |
| 0.26 | 0.25  | 0.01 | empty     | empty          | empty          | empty                                                                                              |



|      |       |      |                |                |                |                                                                                                  |
|------|-------|------|----------------|----------------|----------------|--------------------------------------------------------------------------------------------------|
| 0.26 | 0.10  | 0.16 | BC000392       | Hs.75139       | SYT11          | synaptotagmin XI                                                                                 |
| 0.26 | 0.15  | 0.10 | BC012539       | Hs.27289       | CGI-125        | CGI-125 protein                                                                                  |
| 0.26 | -0.36 | 0.62 | BC001019       | Hs.300141      | MGC10471       | hypothetical protein MGC10471                                                                    |
| 0.26 | -0.11 | 0.37 | BC011006       | Hs.9527        | 3-Apr          | apoptosis related protein APR-3                                                                  |
| 0.26 | -0.36 | 0.62 | BC011747       | Hs.306019      | FLJ14466       | hypothetical protein FLJ14466                                                                    |
| 0.26 | -0.95 | 1.21 | BC008403       | Hs.308026      | ASB6           | ankyrin repeat and SOCS box-containing 6                                                         |
| 0.26 | -0.37 | 0.63 | BC004390       | Hs.77329       | HN1            | hematological and neurological expressed 1                                                       |
| 0.26 | -1.82 | 2.08 | BC014477       | Hs.83465       | NA 4-14-03 449 |                                                                                                  |
| 0.26 | 0.00  | 0.26 | BC000046       | Hs.108287      | KIAA0121       | KIAA0121 gene product                                                                            |
| 0.26 | -0.31 | 0.56 | BC016057       | Hs.132945      | MGC16384       | hypothetical protein MGC16384                                                                    |
| 0.26 | -0.10 | 0.36 | BC001765       | Hs.8217        | ETV5           | ets variant gene 5 (ets-related molecule)                                                        |
| 0.26 | -0.27 | 0.53 | BC011706       | Hs.124005      | FLJ11259       | hypothetical protein FLJ11259                                                                    |
| 0.26 | -0.44 | 0.69 | BC005404       | Hs.173497      | SEC23B         | Sec23 homolog B (S. cerevisiae)                                                                  |
| 0.26 | -0.20 | 0.45 | BC008719       | Hs.173980      | CDC20          | CDC20 cell division cycle 20 homolog (S. cerevisiae)                                             |
| 0.26 | 0.19  | 0.06 | BC016720       | Hs.128051      | CRMP1          | collapsin response mediator protein 1                                                            |
| 0.26 | -0.60 | 0.85 | BC003569       | Data not found | NME1           | non-metastatic cells 1, protein (NM23A) expressed in                                             |
| 0.26 | -0.62 | 0.87 | BC002655       | Hs.26322       | POH1           | 26S proteasome-associated pad1 homolog                                                           |
| 0.25 | -1.93 | 2.18 | BC015541       | Hs.159546      | KIAA0431       | KIAA0431 protein                                                                                 |
| 0.25 | -0.93 | 1.18 | BC000809       | Hs.95243       | TCEAL1         | transcription elongation factor A (SII)-like 1                                                   |
| 0.25 | 0.16  | 0.09 | BC009508       | Hs.432419      | GARS           | glycyl-tRNA synthetase                                                                           |
| 0.25 | -0.34 | 0.60 | BC000376       | Hs.173518      | ZFR            | zinc finger RNA binding protein                                                                  |
| 0.25 | -0.63 | 0.89 | BC010894       | Hs.5324        | CL25022        | hypothetical protein CL25022                                                                     |
| 0.25 | 0.06  | 0.19 | BC017487       | Hs.51299       | RNF25          | ring finger protein 25                                                                           |
| 0.25 | -0.35 | 0.60 | BC008477       | Hs.169248      | FLJ10759       | hypothetical protein FLJ10759                                                                    |
| 0.25 | -1.47 | 1.73 | BC007333       | Hs.43697       | STAG2          | stromal antigen 2                                                                                |
| 0.25 | -0.23 | 0.49 | BC021229       | Hs.127243      | KIAA1724       | KIAA1724 protein                                                                                 |
| 0.25 | -0.01 | 0.26 | BC005172       | Hs.274336      | ALDH3B1        | aldehyde dehydrogenase 3 family, member B1                                                       |
| 0.25 | 0.24  | 0.01 | Data not found |                | KIAA0152       | KIAA0152 gene product                                                                            |
| 0.25 | -0.19 | 0.44 | BC007382       | Hs.55405       | P5326          | hypothetical protein p5326                                                                       |
| 0.25 | -1.38 | 1.63 | BC000866       | Hs.5831        | TIMP1          | tissue inhibitor of metalloproteinase 1 (erythroid potentiating activity, collagenase inhibitor) |
| 0.25 | -0.25 | 0.50 | BC012891       | Hs.422118      | TGFA           | transforming growth factor, alpha                                                                |
| 0.25 | -0.05 | 0.30 | BC007415       | Hs.433334      | MRPS7          | mitochondrial ribosomal protein S7                                                               |
| 0.25 | -0.15 | 0.40 | BC002801       | Hs.12865       | FLJ10545       | hypothetical protein FLJ10545                                                                    |
| 0.25 | -0.57 | 0.81 | BC006195       | Hs.174140      | FLJ20519       | hypothetical protein FLJ20519                                                                    |
| 0.25 | -0.19 | 0.44 | BC002810       | Hs.13128       | RB1CC1         | RB1-inducible coiled-coil 1                                                                      |
| 0.25 | -0.55 | 0.80 | BC008984       | Hs.406462      | OSR2           | odd-skipped-related 2A protein                                                                   |
| 0.25 | -0.48 | 0.73 | BC020988       | Hs.37747       | INPP4B         | inositol polyphosphate-4-phosphatase, type II, 105kDa                                            |
| 0.25 | -0.67 | 0.92 | BC017370       | Hs.279919      | RBX1           | ring-box 1                                                                                       |
| 0.25 | -0.49 | 0.73 | BC012764       | Hs.11056       | POLK           | polymerase (DNA directed) kappa                                                                  |
| 0.25 | 0.14  | 0.10 | BC010130       | Hs.289112      | HSPA8          | heat shock 70kDa protein 8                                                                       |
| 0.25 | -0.75 | 0.99 | BC004288       | Hs.115659      | FYN            | FYN oncogene related to SRC, FGR, YES                                                            |
| 0.25 | -1.63 | 1.88 | BC004380       | Hs.15159       | SDF2           | stromal cell-derived factor 2                                                                    |
| 0.25 | -0.37 | 0.62 | BC017053       | Hs.12773       | GNB2           | guanine nucleotide binding protein (G protein), beta polypeptide 2                               |
| 0.25 | 0.12  | 0.12 | BC001399       | Hs.418650      | FTH1           | ferritin, heavy polypeptide 1                                                                    |
| 0.25 | -0.58 | 0.83 | BC004550       | Hs.272801      | HGS            |                                                                                                  |
| 0.25 | 0.18  | 0.07 | BC007423       | Hs.76927       | TOMM34         | translocase of outer mitochondrial membrane 34                                                   |
| 0.24 | -0.59 | 0.83 | BC002496       | Hs.30376       | HSPC194        | hypothetical protein HSPC194                                                                     |
| 0.24 | -1.33 | 1.58 | BC001763       | Hs.76927       | TMEPAI         | transmembrane, prostate androgen induced RNA                                                     |
| 0.24 | -0.24 | 0.49 | BC002656       | Hs.85092       | IDS            | iduronate 2-sulfatase (Hunter syndrome)                                                          |
| 0.24 | -0.29 | 0.53 | BC015913       | Hs.198726      | CAPN3          | calpain 3, (p94)                                                                                 |
| 0.24 | -0.11 | 0.36 | BC004180       | Hs.307016      | KRTAP4-12      | keratin associated protein 4-12                                                                  |
| 0.24 | -0.27 | 0.51 | BC012737       | Hs.80768       | TRIM29         | tripartite motif-containing 29                                                                   |
| 0.24 | -1.97 | 2.21 | BC006428       | Hs.15093       | DKFZP434N014   | DKFZP434N014 protein                                                                             |

|      |       |      |                |                |                |                                                                                         |
|------|-------|------|----------------|----------------|----------------|-----------------------------------------------------------------------------------------|
| 0.24 | -0.20 | 0.44 | BC004491       | Hs.89862       | MTCP1          | mature T-cell proliferation 1                                                           |
| 0.24 | -0.05 | 0.29 | BC004364       | Hs.25544       | WDR8           | WD repeat domain 8                                                                      |
| 0.24 | -0.26 | 0.51 | BC015405       | Hs.356019      | TAZ            | transcriptional co-activator with PDZ-binding motif (TAZ)                               |
| 0.24 | -1.42 | 1.66 | BC006793       | Hs.169946      | GATA3          | GATA binding protein 3                                                                  |
| 0.24 | -1.08 | 1.32 | BC014901       | Hs.10842       | C20orf3        | chromosome 20 open reading frame 3                                                      |
| 0.24 | -1.09 | 1.33 | BC020568       | Hs.132569      | LOC51136       | PTD016 protein                                                                          |
| 0.24 | -0.94 | 1.18 | BC021213       | Hs.29595       | SEC22C         | SEC22 vesicle trafficking protein-like 3 (S. cerevisiae)                                |
| 0.24 | 0.19  | 0.05 | BC000496       | Hs.168670      | KRT18          | keratin 18                                                                              |
| 0.24 | -0.04 | 0.28 | BC012984       | Data not found | HINT3          | histidine triad nucleotide binding protein 3                                            |
| 0.24 | -1.26 | 1.50 | BC000468       | Hs.75875       | SC4MOL         | sterol-C4-methyl oxidase-like                                                           |
| 0.24 | -0.71 | 0.95 | BC021275       | Hs.409563      | RAGA           | Ras-related GTP-binding protein                                                         |
| 0.24 | -1.52 | 1.76 | BC006101       | Hs.1101        | LAT1-3TM       | LAT1-3TM protein                                                                        |
| 0.24 | -0.39 | 0.62 | BC001407       | Hs.380359      | SLC25A16       | solute carrier family 25 (mitochondrial carrier; Graves disease autoantigen), member 16 |
| 0.24 | -0.11 | 0.35 | BC007555       | Hs.433506      | MGC3077        | hypothetical protein MGC3077                                                            |
| 0.24 | -0.47 | 0.71 | BC012033       | Hs.164989      | TBCE           | tubulin-specific chaperone e                                                            |
| 0.24 | -0.07 | 0.31 | BC002898       | Hs.50748       | LEPROTL1       | leptin receptor overlapping transcript-like 1                                           |
| 0.24 | -0.24 | 0.48 | BC003182       | Hs.772         | MGC20255       | hypothetical protein MGC20255                                                           |
| 0.23 | -0.22 | 0.46 | BC015482       | Hs.62771       | MIZF           | MBD2 (methyl-CpG-binding protein)-interacting zinc finger protein                       |
| 0.23 | -0.67 | 0.90 | BC016172       | Hs.92023       | NA 4-14-03 310 |                                                                                         |
| 0.23 | -0.53 | 0.77 | BC010025       | Hs.356742      | NA 4-14-03 247 |                                                                                         |
| 0.23 | 0.12  | 0.11 | BC000794       | Hs.155244      | PRPF18         | PRP18 pre-mRNA processing factor 18 homolog (yeast)                                     |
| 0.23 | -0.46 | 0.70 | BC001620       | Hs.169609      | FLJ21168       | hypothetical protein FLJ21168                                                           |
| 0.23 | -0.48 | 0.71 | BC010893       | Hs.279761      | HSPC134        | HSPC134 protein                                                                         |
| 0.23 | -1.16 | 1.40 | BC002614       | Hs.77643       | NME4           | non-metastatic cells 4, protein expressed in                                            |
| 0.23 | -0.31 | 0.55 | BC002542       | Hs.23413       | KIAA1273       | KIAA1273 protein                                                                        |
| 0.23 | -0.68 | 0.92 | BC011963       | Hs.432876      | SGT            | small glutamine-rich tetratricopeptide repeat (TPR)-containing                          |
| 0.23 | 0.05  | 0.18 | BC019042       | Hs.71746       | MGC14151       | hypothetical protein MGC14151                                                           |
| 0.23 | -0.88 | 1.11 | BC007949       | Hs.256184      | LOC115548      | hypothetical protein BC014311                                                           |
| 0.23 | -0.19 | 0.42 | BC008386       | Hs.43104       | CYC1           | cytochrome c-1                                                                          |
| 0.23 | -1.09 | 1.33 | BC008733       | Hs.154583      | RBM10          | RNA binding motif protein 10                                                            |
| 0.23 | -0.57 | 0.80 | BC005902       | Hs.81029       | KIAA0410       | nucleoporin like 1                                                                      |
| 0.23 | 0.04  | 0.19 | BC007407       | Hs.83321       | NME2           | non-metastatic cells 2, protein (NM23B) expressed in                                    |
| 0.23 | -1.41 | 1.65 | Data not found |                | FRAT2          | frequently rearranged in advanced T-cell lymphomas 2                                    |
| 0.23 | -1.88 | 2.11 | BC011744       | Hs.417816      | OSBPL3         | oxysterol binding protein-like 3                                                        |
| 0.23 | -0.39 | 0.62 | BC014480       | Data not found | IGFBP2         | insulin-like growth factor binding protein 2, 36kDa                                     |
| 0.23 | -0.45 | 0.68 | BC000019       | Hs.32963       | KIAA0841       | KIAA0841 protein                                                                        |
| 0.23 | -0.77 | 1.00 | BC017660       | Hs.109798      | C6orf48        | chromosome 6 open reading frame 48                                                      |
| 0.23 | 0.06  | 0.17 | BC014253       | Hs.5672        | BDG-29         | BDG-29 proten                                                                           |
| 0.23 | -2.05 | 2.28 | BC015647       | Hs.352221      | C16orf44       | chromosome 16 open reading frame 44                                                     |
| 0.23 | -1.05 | 1.28 | BC006435       | Hs.423216      | DRD2           | dopamine receptor D2                                                                    |
| 0.23 | -1.40 | 1.63 | BC002677       | Hs.10700       | FLJ20139       | hypothetical protein FLJ20139                                                           |
| 0.23 | -0.46 | 0.68 | BC013788       | Hs.48712       | BASP1          | brain abundant, membrane attached signal protein 1                                      |
| 0.23 | -0.94 | 1.17 | BC013961       | Hs.171075      | C11orf23       | chromosome 11 open reading frame 23                                                     |
| 0.23 | -0.15 | 0.38 | BC005237       | Hs.107942      | KRT18          | keratin 18                                                                              |
| 0.23 | -0.14 | 0.36 | BC014791       | Hs.25723       | EPB41L3        | erythrocyte membrane protein band 4.1-like 3                                            |
| 0.23 | -0.47 | 0.69 | BC016654       | Hs.10842       | NA 4-14-03 481 |                                                                                         |
| 0.23 | -0.77 | 0.99 | BC006191       | Hs.79672       | KIAA0652       | KIAA0652 gene product                                                                   |
| 0.23 | 0.13  | 0.10 | BC014178       | Hs.154868      | FLJ23441       | hypothetical protein FLJ23441                                                           |
| 0.23 | -0.20 | 0.42 | BC003540       | Hs.423968      | GLO1           | glyoxalase I                                                                            |
| 0.23 | -2.32 | 2.54 | BC014640       | Hs.403836      | COL14A1        | collagen, type XIV, alpha 1 (undulin)                                                   |
| 0.23 | 0.06  | 0.16 | BC016961       | Data not found | LOC51668       | HSPCO34 protein                                                                         |
| 0.23 | -0.46 | 0.68 | BC010469       | Hs.194673      | UBC            | ubiquitin C                                                                             |

|      |       |      |                |                |                         |                                                                         |
|------|-------|------|----------------|----------------|-------------------------|-------------------------------------------------------------------------|
| 0.23 | -1.06 | 1.28 | BC006808       | Hs.101660      | MGC5391                 | hypothetical protein MGC5391                                            |
| 0.22 | -2.06 | 2.28 | BC008286       | Hs.181046      | DUSP3                   | dual specificity phosphatase 3 (vaccinia virus phosphatase VH1-related) |
| 0.22 | 0.17  | 0.05 | BC002740       | Hs.288991      | ACTA2                   | actin, alpha 2, smooth muscle, aorta                                    |
| 0.22 | 0.12  | 0.11 | Data not found | CA8            | carbonic anhydrase VIII |                                                                         |
| 0.22 | -0.06 | 0.28 | BC010896       | Data not found | NA 4-14-03 436          |                                                                         |
| 0.22 | -0.01 | 0.23 | BC009357       | Hs.406504      | RAI16                   | retinoic acid induced 16                                                |
| 0.22 | -0.15 | 0.37 | BC015153       | Hs.263812      | CDC42EP1                | CDC42 effector protein (Rho GTPase binding) 1                           |
| 0.22 | -1.85 | 2.07 | BC016668       | Hs.110950      | CKIP-1                  | CK2 interacting protein 1; HQ0024c protein                              |
| 0.22 | -0.14 | 0.36 | BC007453       | Hs.4990        | KIAA1089                | KIAA1089 protein                                                        |
| 0.22 | -0.53 | 0.75 | BC007862       | Hs.167641      | NA 4-14-03 515          |                                                                         |
| 0.22 | 0.19  | 0.03 | BC008469       | Hs.28081       | MLYCD                   | malonyl-CoA decarboxylase                                               |
| 0.22 | -0.95 | 1.17 | BC000731       | Hs.6139        | AHCY                    | S-adenosylhomocysteine hydrolase                                        |
| 0.22 | -0.20 | 0.42 | BC017050       | Hs.198365      | NA 4-14-03 25           |                                                                         |
| 0.22 | -0.89 | 1.11 | BC002681       | Hs.87435       | C22orf5                 | chromosome 22 open reading frame 5                                      |
| 0.22 | -0.93 | 1.15 | BC011832       | Hs.274248      | ATPIF1                  | ATPase inhibitory factor 1                                              |
| 0.22 | 0.18  | 0.04 | BC011377       | Hs.155650      | GADD45G                 | growth arrest and DNA-damage-inducible, gamma                           |
| 0.22 | -0.34 | 0.56 | BC012062       | Hs.65588       | POLR2F                  | polymerase (RNA) II (DNA directed) polypeptide F                        |
| 0.22 | -0.02 | 0.24 | BC011834       | Hs.282410      | KIAA1961                | KIAA1961 protein                                                        |
| 0.22 | -0.06 | 0.27 | BC003138       | Hs.344037      | PQBP1                   | polyglutamine binding protein 1                                         |
| 0.22 | -1.97 | 2.19 | BC009898       | Hs.89718       | PFN2                    | profilin 2                                                              |
| 0.21 | -0.19 | 0.41 | BC003672       | Hs.391561      | FLJ20635                | hypothetical protein FLJ20635                                           |
| 0.21 | 0.06  | 0.15 | BC000169       | Hs.155020      | WBSR22                  | Williams Beuren syndrome chromosome region 22                           |
| 0.21 | 0.05  | 0.16 | BC018646       | Hs.75648       | RPL36AL                 | ribosomal protein L36a-like                                             |
| 0.21 | 0.17  | 0.05 | BC002597       | Hs.239720      | KIAA0582                | KIAA0582 protein                                                        |
| 0.21 | 0.04  | 0.18 | BC006454       | Hs.226133      | GAS7                    | growth arrest-specific 7                                                |
| 0.21 | -0.30 | 0.51 | BC009765       | Hs.169992      | SDBCAG84                | serologically defined breast cancer antigen 84                          |
| 0.21 | -0.22 | 0.43 | BC009991       | Hs.339837      | FLJ20371                | chromosome 14 open reading frame 58                                     |
| 0.21 | -0.38 | 0.59 | BC000026       | Hs.209119      | CDC2                    | cell division cycle 2, G1 to S and G2 to M                              |
| 0.21 | -0.37 | 0.58 | NM_005505      | Hs.180616      | LOC146542               | similar to hypothetical protein MGC13138                                |
| 0.21 | -0.90 | 1.12 | NM_152221      | Hs.79658       | TXNRD2                  | thioredoxin reductase 2                                                 |
| 0.21 | -0.42 | 0.64 | BC007230       | Hs.21016       |                         |                                                                         |
| 0.21 | -0.21 | 0.42 | BC017321       | Data not found | CSNK2A1                 | casein kinase 2, alpha 1 polypeptide                                    |
| 0.21 | -0.62 | 0.83 | BC008726       | Hs.95220       | OSR1                    | oxidative-stress responsive 1                                           |
| 0.21 | -0.39 | 0.60 | BC012349       | Hs.1973        | FLJ22688                | hypothetical protein FLJ22688                                           |
| 0.21 | -0.24 | 0.45 | BC003409       | Hs.132071      | OCIA                    | ovarian carcinoma immunoreactive antigen                                |
| 0.21 | 0.12  | 0.09 | BC002400       | Hs.132760      | GFAP                    | glial fibrillary acidic protein                                         |
| 0.21 | -0.75 | 0.96 | BC011574       | Hs.78713       | BAG1                    | BCL2-associated athanogene                                              |
| 0.21 | -0.31 | 0.51 | BC006383       | Hs.4742        | CGI-57                  | hypothetical protein CGI-57                                             |
| 0.21 | -0.30 | 0.51 | BC001142       | Hs.166887      | MAGP2                   | Microfibril-associated glycoprotein-2                                   |
| 0.21 | -0.43 | 0.64 | BC012348       | Hs.91299       | VAMP3                   | vesicle-associated membrane protein 3 (cellubrevin)                     |
| 0.21 | 0.02  | 0.18 | BC018953       | Hs.250581      | MIZF                    | MBD2 (methyl-CpG-binding protein)-interacting zinc finger protein       |
| 0.21 | -0.65 | 0.85 | BC003100       | Hs.1697        | MGC14799                | hypothetical protein MGC14799                                           |
| 0.21 | -0.29 | 0.49 | BC014213       | Hs.159505      | RNF34                   | ring finger protein 34                                                  |
| 0.20 | -1.63 | 1.84 | BC000264       | Hs.250570      | HCS                     | cytochrome c, somatic                                                   |
| 0.20 | 0.11  | 0.10 | BC000530       | Hs.426977      | SLU7                    | step II splicing factor SLU7                                            |
| 0.20 | -0.82 | 1.03 | BC004381       | Hs.95697       | GCDH                    | glutaryl-Coenzyme A dehydrogenase                                       |
| 0.20 | -0.56 | 0.76 | BC009574       | Hs.168289      | SDHD                    | succinate dehydrogenase complex, subunit D, integral membrane protein   |
| 0.20 | -0.13 | 0.34 | BC009823       | Hs.61809       | IGKC                    | immunoglobulin kappa constant                                           |
| 0.20 | -0.20 | 0.41 | BC010067       | Hs.84746       | USP3                    | ubiquitin specific protease 3                                           |
| 0.20 | -1.00 | 1.20 | BC009691       | Hs.183435      | MKNK1                   | MAP kinase-interacting serine/threonine kinase 1                        |
| 0.20 | -0.11 | 0.31 | BC015030       | Hs.9933        | FLJ20013                | hypothetical protein FLJ20013                                           |
| 0.20 | 0.14  | 0.06 | BC004274       | Hs.143554      | MRPL10                  | mitochondrial ribosomal protein L10                                     |
| 0.20 | -1.38 | 1.58 | BC014679       | Hs.76917       | CXCL11                  | chemokine (C-X-C motif) ligand 11                                       |

|      |       |      |                |                |                |                                                                 |
|------|-------|------|----------------|----------------|----------------|-----------------------------------------------------------------|
| 0.20 | 0.14  | 0.06 | BC010073       | Hs.91299       | ACOX3          | acyl-Coenzyme A oxidase 3, pristanoyl                           |
| 0.20 | -0.16 | 0.36 | BC006319       | Hs.56874       | DKC1           | dyskeratosis congenita 1, dyskerin                              |
| 0.20 | 0.07  | 0.13 | BC018951       | Hs.241567      | GNG10          | guanine nucleotide binding protein (G protein), gamma 10        |
| 0.20 | -0.62 | 0.82 | BC003402       | Hs.25516       | FLJ10290       | hypothetical protein FLJ10290                                   |
| 0.20 | -0.47 | 0.67 | BC016276       | Hs.77695       | NA 4-14-03 339 |                                                                 |
| 0.20 | -2.00 | 2.20 | BC007321       | Hs.273234      | MRPS23         | mitochondrial ribosomal protein S23                             |
| 0.20 | -0.98 | 1.18 | BC014568       | Data not found | FYCO1          | FYVE and coiled-coil domain containing 1                        |
| 0.20 | -0.42 | 0.62 | BC021892       | Hs.323567      | NSEPI          | nuclease sensitive element binding protein 1                    |
| 0.20 | 0.05  | 0.15 | BC012098       | Hs.1691        | DNPEP          | aspartyl aminopeptidase                                         |
| 0.20 | 0.13  | 0.07 | BC013014       | Hs.323213      | RNF29          | ring finger protein 29                                          |
| 0.20 | -0.53 | 0.72 | BC000285       | Hs.274319      | LOC55871       | COBW-like protein                                               |
| 0.20 | -0.04 | 0.24 | BC002447       | Hs.123637      | PSMC3          | proteasome (prosome, macropain) 26S subunit, ATPase, 3          |
| 0.20 | -0.13 | 0.33 | BC007250       | Hs.10326       | KIAA0103       | KIAA0103 gene product                                           |
| 0.20 | -0.17 | 0.37 | BC003553       | Hs.5148        | SLC22A5        | solute carrier family 22 (organic cation transporter), member 5 |
| 0.20 | -0.14 | 0.34 | BC014148       | Hs.201677      | MGC4659        | hypothetical protein MGC4659                                    |
| 0.20 | -0.21 | 0.41 | BC001327       | Hs.315177      | IFRD2          | interferon-related developmental regulator 2                    |
| 0.20 | -1.47 | 1.66 | BC006551       | Hs.76084       | MAPK14         | mitogen-activated protein kinase 14                             |
| 0.20 | -0.44 | 0.64 | BC017594       | Hs.104058      | NA 4-14-03 88  |                                                                 |
| 0.20 | -0.40 | 0.60 | BC001958       | Hs.103561      | FLJ10759       | hypothetical protein FLJ10759                                   |
| 0.20 | 0.05  | 0.14 | BC006363       | Hs.9018        | TRIP10         | thyroid hormone receptor interactor 10                          |
| 0.20 | -0.74 | 0.94 | Data not found |                | SNX3           | sorting nexin 3                                                 |
| 0.19 | -0.11 | 0.30 | BC007717       | Hs.296365      | PUM1           | pumilio homolog 1 (Drosophila)                                  |
| 0.19 | 0.04  | 0.15 | BC000894       | Hs.9676        | FASTK          | FAST kinase                                                     |
| 0.19 | -1.35 | 1.54 | BC012602       | Hs.32970       | SLAM           | signaling lymphocytic activation molecule                       |
| 0.19 | -0.47 | 0.67 | BC021998       | Hs.421349      | GFPT2          | glutamine-fructose-6-phosphate transaminase 2                   |
| 0.19 | 0.08  | 0.11 | BC007833       | Hs.149255      | CHST8          | carbohydrate (N-acetylgalactosamine 4-0) sulfotransferase 8     |
| 0.19 | -0.05 | 0.24 | BC008456       | Hs.81029       | MGC3162        | hypothetical protein MGC3162                                    |
| 0.19 | 0.16  | 0.04 | BC006486       | Hs.429607      | MOG1           | homolog of yeast MOG1                                           |
| 0.19 | -0.35 | 0.54 | BC005891       | Hs.123536      | MGC3103        | hypothetical protein MGC3103                                    |
| 0.19 | -1.20 | 1.39 | BC009963       | Hs.3080        | PEX10          | peroxisome biogenesis factor 10                                 |
| 0.19 | -0.24 | 0.43 | BC011765       | Hs.303025      | UCHL5          | ubiquitin carboxyl-terminal hydrolase L5                        |
| 0.19 | -0.23 | 0.42 | BC004902       | Hs.5070        | PEX11A         | peroxisomal biogenesis factor 11A                               |
| 0.19 | -1.41 | 1.61 | BC010913       | Hs.283108      | HBG1           | hemoglobin, gamma A                                             |
| 0.19 | -0.88 | 1.07 | BC008679       | Hs.33922       | GABPB2         | GA binding protein transcription factor, beta subunit 2, 47kDa  |
| 0.19 | -1.48 | 1.67 | BC011959       | Hs.317589      | ARHI           | ras homolog gene family, member 1                               |
| 0.19 | -1.58 | 1.77 | BC013923       | Hs.816         | HSGT1          | suppressor of S. cerevisiae gcr2                                |
| 0.19 | -0.60 | 0.79 | BC002734       | Hs.251573      | HEBP1          | heme binding protein 1                                          |
| 0.19 | -0.06 | 0.25 | BC013436       | Hs.39619       | MGC2494        | hypothetical protein MGC2494                                    |
| 0.19 | 0.12  | 0.07 | BC013069       | Hs.46634       | PRO2389        | WD repeat domain 23                                             |
| 0.19 | 0.00  | 0.19 | BC008771       | Hs.157199      | TFRC           | transferrin receptor (p90, CD71)                                |
| 0.19 | -1.18 | 1.37 | BC000837       | Hs.351327      | FLJ20452       | hypothetical protein FLJ20452                                   |
| 0.19 | -1.92 | 2.10 | BC017072       | Hs.332382      | TTR            | transthyretin (prealbumin, amyloidosis type I)                  |
| 0.19 | -0.35 | 0.54 | BC007978       | Hs.6449        | TREX2          | three prime repair exonuclease 2                                |
| 0.19 | -1.16 | 1.34 | BC015534       | Hs.16258       | CSNK1G1        | casein kinase 1, gamma 1                                        |
| 0.19 | -0.10 | 0.28 | BC016824       | Hs.355719      | CSR2BP         | CSR2 binding protein                                            |
| 0.19 | -2.02 | 2.21 | BC002687       | Hs.24563       | NA 4-14-03 31  |                                                                 |
| 0.19 | 0.17  | 0.02 | BC012865       | Hs.299148      | TAGLN2         | transgelin 2                                                    |
| 0.19 | -0.02 | 0.21 | BC021667       | Hs.154387      | COPE           | coatamer protein complex, subunit epsilon                       |
| 0.19 | -0.90 | 1.08 | BC015632       | Hs.236547      | GMMPR2         | guanosine monophosphate reductase 2                             |
| 0.19 | -1.18 | 1.37 | BC016043       | Hs.94814       | C6.1A          | c6.1A                                                           |
| 0.19 | 0.06  | 0.13 | BC002469       | Hs.79457       | ACLY           | ATP citrate lyase                                               |
| 0.19 | -0.11 | 0.29 | BC009733       | Hs.422118      | MGC4840        | hypothetical protein MGC4840                                    |
| 0.19 | -1.32 | 1.51 | BC001204       | Hs.309161      | UCP3           | uncoupling protein 3 (mitochondrial, proton carrier)            |

|      |       |      |          |                |                |                                                                                                                                                   |
|------|-------|------|----------|----------------|----------------|---------------------------------------------------------------------------------------------------------------------------------------------------|
| 0.18 | -1.23 | 1.42 | BC015722 | Hs.23241       | CERK           | ceramide kinase                                                                                                                                   |
| 0.18 | -0.67 | 0.86 | BC009957 | Hs.20157       | TSG            | twisted gastrulation homolog 1 (Drosophila)                                                                                                       |
| 0.18 | -0.50 | 0.69 | BC008472 | Hs.82159       | EIF3S9         | eukaryotic translation initiation factor 3, subunit 9 eta, 116kDa                                                                                 |
| 0.18 | -0.77 | 0.95 | BC000836 | Hs.184542      | CGI-127        | yippee protein                                                                                                                                    |
| 0.18 | -0.83 | 1.02 | BC002489 | Hs.85100       | WDR1           | WD repeat domain 1                                                                                                                                |
| 0.18 | -0.48 | 0.66 | BC009568 | Hs.6467        | MGC13090       | hypothetical protein MGC13090                                                                                                                     |
| 0.18 | -1.68 | 1.87 | BC007705 | Hs.31439       | LOC51042       | zinc finger protein                                                                                                                               |
| 0.18 | -3.97 | 4.15 | BC004290 | Hs.282960      | CASP7          | caspase 7, apoptosis-related cysteine protease                                                                                                    |
| 0.18 | -1.13 | 1.32 | BC013306 | Hs.172772      | LOC51204       | clone HQ0477 PRO0477p                                                                                                                             |
| 0.18 | -0.36 | 0.54 | BC000526 | Hs.3447        | PX19           | px19-like protein                                                                                                                                 |
| 0.18 | 0.13  | 0.05 | BC008320 | Hs.146393      | RPE            | ribulose-5-phosphate-3-epimerase                                                                                                                  |
| 0.18 | -0.79 | 0.97 | BC013996 | Hs.6980        | C12orf4        | chromosome 12 open reading frame 4                                                                                                                |
| 0.18 | -0.64 | 0.82 | BC006271 | Data not found | AGPAT2         | 1-acylglycerol-3-phosphate O-acyltransferase 2 (lysophosphatidic acid acyltransferase, beta)                                                      |
| 0.18 | -0.02 | 0.20 | BC015548 | Data not found | PIN4           | protein (peptidyl-prolyl cis/trans isomerase) NIMA-interacting, 4 (parvulin)                                                                      |
| 0.18 | 0.09  | 0.09 | BC017378 | Hs.51043       | ARS2           | arsenate resistance protein ARS2                                                                                                                  |
| 0.18 | -5.08 | 5.26 | BC009763 | Hs.83761       | PPIL2          | peptidylprolyl isomerase (cyclophilin)-like 2                                                                                                     |
| 0.18 | -0.34 | 0.52 | BC014320 | Hs.240767      | ETV4           | ets variant gene 4 (E1A enhancer binding protein, E1AF)                                                                                           |
| 0.18 | 0.09  | 0.09 | BC002619 | Hs.70669       | MGC11061       | hypothetical protein MGC11061                                                                                                                     |
| 0.18 | -1.59 | 1.77 | BC004817 | Hs.129953      | EWSR1          | Ewing sarcoma breakpoint region 1                                                                                                                 |
| 0.18 | 0.13  | 0.05 | BC010218 | Hs.262823      | GK001          | GK001 protein                                                                                                                                     |
| 0.18 | -0.23 | 0.40 | BC013705 | Hs.23744       | RISC           | likely homolog of rat and mouse retinoid-inducible serine carboxypeptidase                                                                        |
| 0.18 | -0.34 | 0.52 | BC001177 | Hs.271687      | KIAA0010       | ubiquitin-protein isopeptide ligase (E3)                                                                                                          |
| 0.18 | -0.43 | 0.61 | BC008863 | Hs.5409        | REA            | repressor of estrogen receptor activity                                                                                                           |
| 0.18 | -0.05 | 0.23 | BC008831 | Hs.429777      | PHB            | prohibitin                                                                                                                                        |
| 0.18 | 0.11  | 0.07 | BC000398 | Hs.93354       | EXO70          | likely ortholog of mouse exocyst component protein 70 kDa homolog (S. cerevisiae) Exo70: exocyst component protein 70 kDa homolog (S. cerevisiae) |
| 0.18 | -0.24 | 0.41 | BC005249 | Hs.9222        | MLC1SA         | myosin light chain 1 slow a                                                                                                                       |
| 0.18 | -1.79 | 1.97 | BC007403 | Hs.82890       | GMDS           | GDP-mannose 4,6-dehydratase                                                                                                                       |
| 0.17 | -0.83 | 1.01 | BC018926 | Hs.279746      | AKAP12         | A kinase (PRKA) anchor protein (gravin) 12                                                                                                        |
| 0.17 | -0.40 | 0.57 | BC016767 | Hs.30724       | MGC4796        | hypothetical protein MGC4796                                                                                                                      |
| 0.17 | -0.49 | 0.66 | BC015563 | Hs.179915      | ZNF339         | zinc finger protein 339                                                                                                                           |
| 0.17 | 0.14  | 0.03 | BC001346 | Hs.22142       | CYB5R2         | cytochrome b5 reductase b5R.2                                                                                                                     |
| 0.17 | 0.12  | 0.06 | BC007279 | Hs.5486        | UBE2V2         | ubiquitin-conjugating enzyme E2 variant 2                                                                                                         |
| 0.17 | -0.10 | 0.28 | BC003135 | Hs.157         | SPN            | sialophorin (gpL115, leukosialin, CD43)                                                                                                           |
| 0.17 | -1.80 | 1.97 | BC000793 | Hs.4310        | EIF1A          | eukaryotic translation initiation factor 1A                                                                                                       |
| 0.17 | -0.39 | 0.56 | BC013571 | Hs.289043      | SDR1           | short-chain dehydrogenase/reductase 1                                                                                                             |
| 0.17 | -0.77 | 0.95 | BC015711 | Hs.8261        | MGC10818       | hypothetical protein MGC10818                                                                                                                     |
| 0.17 | -0.11 | 0.28 | BC011755 | Hs.5198        | E2F3           | E2F transcription factor 3                                                                                                                        |
| 0.17 | -0.16 | 0.34 | BC018938 | Hs.284295      | NSE1           | non-SMC (structural maintenance of chromosomes) element 1 protein                                                                                 |
| 0.17 | -0.15 | 0.32 | BC009363 | Hs.285005      | DEC2           | 2,4-dienoyl CoA reductase 2, peroxisomal                                                                                                          |
| 0.17 | -1.38 | 1.55 | BC012303 | Hs.271473      | DKFZP434O1427  | dactylidin                                                                                                                                        |
| 0.17 | -0.75 | 0.92 | BC007008 | Hs.408767      | SPINT2         | serine protease inhibitor, Kunitz type, 2                                                                                                         |
| 0.17 | -0.52 | 0.69 | BC012384 | Hs.80019       | PSMC6          | proteasome (prosome, macropain) 26S subunit, ATPase, 6                                                                                            |
| 0.17 | -0.62 | 0.79 | BC001211 | Hs.23131       | CAPNS2         | calpain small subunit 2                                                                                                                           |
| 0.17 | 0.05  | 0.12 | BC001165 | Hs.75932       | IGFBP2         | insulin-like growth factor binding protein 2, 36kDa                                                                                               |
| 0.17 | -1.04 | 1.21 | BC016641 | Hs.61628       | FLJ40452       | hypothetical protein FLJ40452                                                                                                                     |
| 0.17 | -0.15 | 0.32 | BC007814 | Hs.277477      | MRPL51         | mitochondrial ribosomal protein L51                                                                                                               |
| 0.17 | -0.80 | 0.97 | BC015602 | Hs.302131      | LOC57228       | hypothetical protein from clone 643                                                                                                               |
| 0.17 | -0.93 | 1.10 | BC000875 | Hs.279609      | ZNF9           | zinc finger protein 9 (a cellular retroviral nucleic acid binding protein)                                                                        |
| 0.17 | -0.86 | 1.03 | BC018543 | Hs.108947      | REC14          | recombination protein REC14                                                                                                                       |
| 0.17 | -0.37 | 0.54 | BC008631 | Hs.334913      | RBM4           | RNA binding motif protein 4                                                                                                                       |
| 0.17 | 0.02  | 0.15 | BF797140 | Hs.446643      | NA 4-14-03 147 |                                                                                                                                                   |

|      |       |      |          |                |               |                                                                                            |
|------|-------|------|----------|----------------|---------------|--------------------------------------------------------------------------------------------|
| 0.17 | -0.93 | 1.10 | BC015039 | Hs.389137      | LOC90346      | hypothetical protein BC004930                                                              |
| 0.17 | -1.19 | 1.36 | BC001429 | Hs.300711      | CITED2        | Cbp/p300-interacting transactivator, with Glu/Asp-rich carboxy-terminal domain, 2          |
| 0.17 | -1.83 | 1.99 | BC008882 | Hs.288672      | CDC42         | cell division cycle 42 (GTP binding protein, 25kDa)                                        |
| 0.17 | -1.85 | 2.02 | BC009702 | Hs.349177      | HSPC132       | hypothetical protein HSPC132                                                               |
| 0.16 | -0.82 | 0.98 | BC009297 | Data not found | FLJ21128      | hypothetical protein FLJ21128                                                              |
| 0.16 | 0.10  | 0.06 | BC016759 | Hs.77054       | SLC3A2        | solute carrier family 3 (activators of dibasic and neutral amino acid transport), member 2 |
| 0.16 | -0.04 | 0.21 | BC011778 | Hs.11039       | DDX30         | DEAD/H (Asp-Glu-Ala-Asp/His) box polypeptide 30                                            |
| 0.16 | -0.43 | 0.59 | BC012616 | Hs.80756       | BHMT          | betaine-homocysteine methyltransferase                                                     |
| 0.16 | -0.59 | 0.75 | BC008442 | Hs.351316      | AP1S1         | adaptor-related protein complex 1, sigma 1 subunit                                         |
| 0.16 | -1.28 | 1.44 | BC005009 | Hs.271599      | UREB1         | upstream regulatory element binding protein 1                                              |
| 0.16 | -1.72 | 1.88 | BC011020 | Hs.152720      | MPHOSPH6      | M-phase phosphoprotein 6                                                                   |
| 0.16 | -0.33 | 0.49 | BC021276 | Hs.413826      | HSPA8         | heat shock 70kDa protein 8                                                                 |
| 0.16 | -1.79 | 1.95 | BC014454 | Hs.211581      | LOC92979      | hypothetical protein BC009489                                                              |
| 0.16 | -0.27 | 0.43 | BC004302 | Hs.6671        | TOMM34        | translocase of outer mitochondrial membrane 34                                             |
| 0.16 | -0.12 | 0.28 | BC008475 | Hs.169248      | MGC3180       | hypothetical protein MGC3180                                                               |
| 0.16 | -0.12 | 0.28 | BC015858 | Hs.54488       | LOC113521     | similar to avenaII                                                                         |
| 0.16 | -0.43 | 0.59 | BC007340 | Hs.106880      | GDAP1L1       | ganglioside-induced differentiation-associated protein 1-like 1                            |
| 0.16 | -0.83 | 0.99 | BC006328 | Hs.279946      | LOC114926     | hypothetical protein BC013035                                                              |
| 0.16 | -0.83 | 0.99 | BC015727 | Hs.235782      | PAGE-5        | PAGE-5 protein                                                                             |
| 0.16 | -1.43 | 1.59 | BC002968 | Hs.182595      | MYCL1         | v-myc myelocytomatosis viral oncogene homolog 1, lung carcinoma derived (avian)            |
| 0.16 | -0.08 | 0.24 | BC006367 | Hs.118695      | KIAA0638      | KIAA0638 protein                                                                           |
| 0.16 | -0.21 | 0.36 | BC001367 | Hs.84162       | HUMAGCGB      | chromosome 3p21.1 gene sequence                                                            |
| 0.16 | -0.21 | 0.36 | BC000739 | Hs.432574      | NA 4-14-03 48 |                                                                                            |
| 0.16 | -0.65 | 0.81 | BC018302 | Hs.158947      | SPHK1         | sphingosine kinase 1                                                                       |
| 0.16 | -1.43 | 1.59 | BC004955 | Data not found | CGBP          | CpG binding protein                                                                        |
| 0.16 | -1.04 | 1.19 | BC011640 | Hs.6770        | SNX14         | sorting nexin 14                                                                           |
| 0.16 | -0.31 | 0.46 | BC004449 | Hs.78881       | HES2          | hairly and enhancer of split (Drosophila) homolog 2                                        |
| 0.16 | -2.05 | 2.21 | BC015651 | Hs.125379      | FLJ21820      | hypothetical protein FLJ21820                                                              |
| 0.15 | -0.88 | 1.03 | BC001222 | Hs.15921       | HCS           | cytochrome c, somatic                                                                      |
| 0.15 | -1.61 | 1.77 | BC007991 | Hs.6686        | DKFZP564O1664 | hypothetical protein DKFZp564O1664                                                         |
| 0.15 | -0.13 | 0.29 | BC011568 | Hs.297875      | NFKBIA        | nuclear factor of kappa light polypeptide gene enhancer in B-cells inhibitor, alpha        |
| 0.15 | -0.11 | 0.26 | BC014230 | Data not found | PPP1R16A      | protein phosphatase 1, regulatory (inhibitor) subunit 16A                                  |
| 0.15 | -0.16 | 0.31 | BC008933 | Hs.433307      | BCKDHA        | branched chain keto acid dehydrogenase E1, alpha polypeptide (maple syrup urine disease)   |
| 0.15 | -2.00 | 2.15 | BC004261 | Hs.130316      | SNAI2         | snail homolog 2 (Drosophila)                                                               |
| 0.15 | -1.63 | 1.78 | BC002628 | Hs.71622       | Dlc2          | dynein light chain 2                                                                       |
| 0.15 | -0.04 | 0.19 | BC004861 | Hs.128231      | LOC51234      | hypothetical protein LOC51234                                                              |
| 0.15 | -0.96 | 1.11 | BC010623 | Hs.83469       | MARS          | methionine-tRNA synthetase                                                                 |
| 0.15 | -0.80 | 0.95 | BC000807 | Hs.206882      | KR18          | KRAB zinc finger protein KR18                                                              |
| 0.15 | -0.30 | 0.45 | BC001239 | Hs.5268        | CD63          | CD63 antigen (melanoma 1 antigen)                                                          |
| 0.15 | -0.77 | 0.92 | BC019291 | Hs.73722       | PCOLCE2       | procollagen C-endopeptidase enhancer 2                                                     |
| 0.15 | -0.04 | 0.19 | BC004310 | Hs.240534      | FLJ20220      | hypothetical protein FLJ20220                                                              |
| 0.15 | -0.07 | 0.22 | BC000891 | Hs.18349       | MRPL15        | mitochondrial ribosomal protein L15                                                        |
| 0.15 | 0.14  | 0.01 | BC006997 | Hs.220689      | FLJ22386      | hypothetical protein FLJ22386                                                              |
| 0.15 | -0.77 | 0.92 | BC011549 | Hs.56155       | MGAT1         | mannosyl (alpha-1,3-)-glycoprotein beta-1,2-N-acetylglucosaminyltransferase                |
| 0.15 | -0.37 | 0.52 | BC001800 | Hs.98258       | CSRP3         | cysteine and glycine-rich protein 3 (cardiac LIM protein)                                  |
| 0.15 | -0.87 | 1.02 | BC009770 | Hs.3576        | C20orf30      | chromosome 20 open reading frame 30                                                        |
| 0.15 | -1.44 | 1.59 | BC001793 | Hs.406503      | C1orf2        | chromosome 1 open reading frame 2                                                          |
| 0.15 | -0.14 | 0.28 | BC008769 | Hs.417068      | ALG12         | dolichyl-p-mannose:Man7GlcNAc2-PP-dolichyl mannosyltransferase                             |
| 0.15 | -0.10 | 0.25 | BC011792 | Hs.196176      | IFI27         | interferon, alpha-inducible protein 27                                                     |
| 0.15 | -0.21 | 0.36 | BC001725 | Hs.47313       | BACH          | brain acyl-CoA hydrolase                                                                   |
| 0.15 | -0.53 | 0.67 | BC014664 | Hs.347991      | GTF2H4        | general transcription factor IIH, polypeptide 4, 52kDa                                     |
| 0.15 | -0.94 | 1.09 | BC004967 | Hs.9194        | NA 4-14-03 99 |                                                                                            |

|      |       |      |                |           |              |                                                                                          |
|------|-------|------|----------------|-----------|--------------|------------------------------------------------------------------------------------------|
| 0.15 | -1.43 | 1.57 | BC000933       | Hs.75253  | IDH3G        | isocitrate dehydrogenase 3 (NAD+) gamma                                                  |
| 0.15 | -0.74 | 0.88 | BC014123       | Hs.288959 |              |                                                                                          |
| 0.14 | 0.06  | 0.09 | BC009055       | Hs.20537  | LFNG         | lunatic fringe homolog (Drosophila)                                                      |
| 0.14 | -0.06 | 0.20 | BC005141       | Hs.129228 | DGCR14       | DiGeorge syndrome critical region gene 14                                                |
| 0.14 | -1.22 | 1.36 | BC001042       | Hs.19306  | SIRT3        | sirtuin (silent mating type information regulation 2 homolog) 3 (S. cerevisiae)          |
| 0.14 | -0.21 | 0.35 | BC006272       | Hs.82906  | C20orf4      | chromosome 20 open reading frame 4                                                       |
| 0.14 | -0.55 | 0.69 | BC001292       | Hs.20017  | C22orf4      | chromosome 22 open reading frame 4                                                       |
| 0.14 | -2.99 | 3.13 | BC001012       | Hs.279916 | DKFZP566B183 | DKFZP566B183 protein                                                                     |
| 0.14 | -0.28 | 0.42 | BC016946       | Hs.11039  | TXNDC4       | thioredoxin domain containing 4 (endoplasmic reticulum)                                  |
| 0.14 | -1.51 | 1.65 | BC011949       | Hs.155097 | REG1A        | regenerating islet-derived 1 alpha (pancreatic stone protein, pancreatic thread protein) |
| 0.14 | -1.10 | 1.24 | BC009747       | Hs.334684 | MGC13005     | hypothetical protein MGC13005                                                            |
| 0.14 | -0.48 | 0.63 | BC001643       | Hs.76090  | TNFAIP1      | tumor necrosis factor, alpha-induced protein 1 (endothelial)                             |
| 0.14 | -0.36 | 0.50 | NM_005488      | Hs.9482   | JAM1         | F11 receptor                                                                             |
| 0.14 | -0.76 | 0.91 | BC006242       | Hs.98798  | PYCR1        | pyrroline-5-carboxylate reductase 1                                                      |
| 0.14 | -0.62 | 0.76 | BC013044       | Hs.21189  | MGC11287     | ribosomal protein S6 kinase-like 1                                                       |
| 0.14 | -0.07 | 0.21 | BC009596       | Hs.381154 | TPMT         | thiopurine S-methyltransferase                                                           |
| 0.14 | -0.02 | 0.16 | BC017441       | Hs.129445 | SLC30A5      | solute carrier family 30 (zinc transporter), member 5                                    |
| 0.14 | -0.85 | 0.99 | BC008282       | Hs.97858  | SH3BP1       | SH3-domain binding protein 1                                                             |
| 0.14 | -0.37 | 0.51 | BC005280       | Hs.514    | C20orf72     | chromosome 20 open reading frame 72                                                      |
| 0.14 | 0.13  | 0.01 | BC016944       | Hs.48855  | IL18         | interleukin 18 (interferon-gamma-inducing factor)                                        |
| 0.14 | -0.39 | 0.53 | BC015928       | Hs.24684  | CBR3         | carbonyl reductase 3                                                                     |
| 0.14 | -1.11 | 1.25 | BC005149       | Hs.12909  | G1P3         | interferon, alpha-inducible protein (clone IFI-6-16)                                     |
| 0.14 | -0.17 | 0.30 | BC003154       | Hs.236218 | PCSK5        | proprotein convertase subtilisin/kexin type 5                                            |
| 0.14 | -0.67 | 0.81 | BC001628       | Hs.14394  | WDF2         | WD40 and FYVE domain containing 2                                                        |
| 0.14 | -0.01 | 0.15 | BC004463       | Hs.107382 | DJ667H12.2   | hypothetical protein DJ667H12.2                                                          |
| 0.14 | -0.13 | 0.27 | BC000555       | Hs.296290 | MGC11102     | hypothetical protein MGC11102                                                            |
| 0.14 | -0.62 | 0.76 | BC013017       | Hs.433996 | EPB49        | erythrocyte membrane protein band 4.9 (dematin)                                          |
| 0.14 | -0.01 | 0.15 | BC021968       | Hs.289072 | RYBP         | RING1 and YY1 binding protein                                                            |
| 0.14 | -0.88 | 1.02 | BC014515       | Hs.94300  | AXIN2        | axin 2 (conductin, axil)                                                                 |
| 0.14 | -0.52 | 0.65 | BC002675       | Hs.177776 | FLJ21916     | chromosome 14 open reading frame 137                                                     |
| 0.14 | -1.05 | 1.18 | BC009016       | Hs.94953  | API5         | apoptosis inhibitor 5                                                                    |
| 0.13 | -0.26 | 0.40 | BC009194       | Hs.30541  | NAT2         | N-acetyltransferase 2 (arylamine N-acetyltransferase)                                    |
| 0.13 | -0.16 | 0.30 | BC009670       | Hs.279669 | AAK1         | adaptor-associated kinase 1                                                              |
| 0.13 | 0.11  | 0.02 | BC001721       | Hs.86948  | S100A8       | S100 calcium binding protein A8 (calgranulin A)                                          |
| 0.13 | -0.64 | 0.77 | BC009107       | Hs.14014  | HNRPDL       | heterogeneous nuclear ribonucleoprotein D-like                                           |
| 0.13 | -1.45 | 1.59 | BC001217       | Hs.268053 | DPM1         | dolichyl-phosphate mannosyltransferase polypeptide 1, catalytic subunit                  |
| 0.13 | -0.23 | 0.36 | BC000449       | Hs.183704 | PEA15        | phosphoprotein enriched in astrocytes 15                                                 |
| 0.13 | -0.15 | 0.28 | BC005152       | Hs.279818 | AKR7A2       | aldo-keto reductase family 7, member A2 (aflatoxin aldehyde reductase)                   |
| 0.13 | -0.51 | 0.64 | BC012341       | Hs.79530  | SEPX1        | selenoprotein X, 1                                                                       |
| 0.13 | -1.97 | 2.10 | BC000996       | Hs.6396   | JTB          | jumping translocation breakpoint                                                         |
| 0.13 | 0.05  | 0.08 | BC000941       | Hs.124027 | SPS          | selenophosphate synthetase                                                               |
| 0.13 | -0.15 | 0.28 | BC006419       | Hs.334504 | BAAT         | bile acid Coenzyme A: amino acid N-acyltransferase (glycine N-choyltransferase)          |
| 0.13 | -0.53 | 0.66 | BC010010       | Hs.334641 | PTGS2        | prostaglandin-endoperoxide synthase 2 (prostaglandin G/H synthase and cyclooxygenase)    |
| 0.13 | -0.29 | 0.42 | BC019346       | Hs.131190 | MGC13034     | hypothetical protein MGC13034                                                            |
| 0.13 | -0.83 | 0.96 | BC010897       | Hs.95420  | GAGEC1       | G antigen, family C, 1                                                                   |
| 0.13 | -0.31 | 0.44 | BC004333       | Hs.273415 | WWP2         | Nedd-4-like ubiquitin-protein ligase                                                     |
| 0.13 | -1.80 | 1.93 | BC007846       | Hs.132898 | LOC115861    |                                                                                          |
| 0.13 | -0.30 | 0.43 | BC015126       | Hs.40919  | HLA-DPB1     | major histocompatibility complex, class II, DP beta 1                                    |
| 0.13 | 0.00  | 0.13 | BC007419       | Hs.26440  | HPRP3P       | U4/U6-associated RNA splicing factor                                                     |
| 0.13 | -0.57 | 0.70 | BC010021       | Hs.180900 | LOC90557     | hypothetical protein BC016861                                                            |
| 0.13 | -0.28 | 0.41 | BC022062       | Hs.282804 | FLJ10035     | hypothetical protein FLJ10035                                                            |
| 0.13 | -0.22 | 0.35 | BC014324       | Hs.44423  | MGC15438     | hypothetical protein MGC15438                                                            |
| 0.13 | -0.53 | 0.66 | Data not found |           | HRMT1L2      | HMT1 hnRNP methyltransferase-like 2 (S. cerevisiae)                                      |

|      |       |      |          |           |               |                                                                                       |
|------|-------|------|----------|-----------|---------------|---------------------------------------------------------------------------------------|
| 0.13 | -0.61 | 0.73 | BC004207 | Hs.146329 | FLJ25070      | hypothetical protein FLJ25070                                                         |
| 0.13 | -0.61 | 0.73 | BC014994 | Hs.6150   | ACOX1         | acyl-Coenzyme A oxidase 1, palmitoyl                                                  |
| 0.12 | -0.21 | 0.34 | BC014349 | Hs.355719 | PKM2          | pyruvate kinase, muscle                                                               |
| 0.12 | -0.01 | 0.13 | BC003563 | Hs.424138 | KIAA0101      | KIAA0101 gene product                                                                 |
| 0.12 | -0.25 | 0.37 | BC011025 | Hs.422340 | SRI           | sorcini                                                                               |
| 0.12 | -3.05 | 3.17 | BC017693 | Hs.171012 | DHRS1         | dehydrogenase/reductase SDR family member 1                                           |
| 0.12 | -0.40 | 0.53 | BC011797 | Hs.96247  | TPD52         | tumor protein D52                                                                     |
| 0.12 | -0.61 | 0.73 | BC015984 | Hs.356795 | FLJ20374      | hypothetical protein FLJ20374                                                         |
| 0.12 | -0.76 | 0.88 | BC016319 | Hs.433898 | APBA3         | amyloid beta (A4) precursor protein-binding, family A, member 3 (X11-like 2)          |
| 0.12 | 0.01  | 0.11 | BC002523 | Hs.63489  | RPS10         |                                                                                       |
| 0.12 | -1.24 | 1.36 | BC004289 | Hs.7482   | MATR3         | matrin 3                                                                              |
| 0.12 | -0.22 | 0.34 | BC018198 | Hs.247220 | MAPK7         | mitogen-activated protein kinase 7                                                    |
| 0.12 | 0.11  | 0.01 | BC016842 | Hs.8258   | RCL           | putative c-Myc-responsive                                                             |
| 0.12 | -0.47 | 0.59 | BC000358 | Hs.3136   | FLJ22390      | hypothetical protein FLJ22390                                                         |
| 0.12 | -0.42 | 0.54 | BC008765 | Hs.82109  | SDC1          | syndecan 1                                                                            |
| 0.12 | -0.63 | 0.75 | BC014075 | Hs.283677 | CDK5RAP1      | CDK5 regulatory subunit associated protein 1                                          |
| 0.12 | -0.25 | 0.37 | BC014145 | Hs.261134 | MGC14128      | hypothetical protein MGC14128                                                         |
| 0.12 | -1.86 | 1.98 | BC013420 | Hs.223014 | WNT5B         | wingless-type MMTV integration site family, member 5B                                 |
| 0.12 | -0.47 | 0.59 | BC008293 | Hs.293659 | FOXM1         | forkhead box M1                                                                       |
| 0.12 | -0.54 | 0.66 | BC017242 | Hs.104637 | PELO          | pelota homolog (Drosophila)                                                           |
| 0.12 | 0.01  | 0.11 | BC007527 | Hs.183138 | ENDOG         | endonuclease G                                                                        |
| 0.12 | 0.03  | 0.09 | BC015128 | Hs.107476 | ZDHHC6        | zinc finger, DHHC domain containing 6                                                 |
| 0.12 | 0.09  | 0.03 | BC006550 | Hs.146381 | RBMX          | RNA binding motif protein, X chromosome                                               |
| 0.12 | -1.94 | 2.06 | BC012069 | Hs.355399 | TCFL1         | transcription factor-like 1                                                           |
| 0.12 | -1.61 | 1.73 | BC013162 | Hs.235356 | STEAP         | six transmembrane epithelial antigen of the prostate                                  |
| 0.12 | -1.00 | 1.11 | BC000439 | Hs.979    | PDHB          | pyruvate dehydrogenase (lipoamide) beta                                               |
| 0.12 | -1.16 | 1.27 | BC020956 | Hs.7187   | BCAS2         | breast carcinoma amplified sequence 2                                                 |
| 0.12 | -1.37 | 1.49 | BC004270 | Hs.238730 | MKRN2         | makorin, ring finger protein, 2                                                       |
| 0.12 | -0.37 | 0.49 | BC007412 | Hs.265317 | FLJ13352      | hypothetical protein FLJ13352                                                         |
| 0.12 | -0.97 | 1.08 | BC011034 | Hs.9667   | BBOX1         | butyrobetaine (gamma), 2-oxoglutarate dioxygenase (gamma-butyrobetaine hydroxylase) 1 |
| 0.12 | -1.76 | 1.88 | BC017729 | Hs.9222   | RPA3          | replication protein A3, 14kDa                                                         |
| 0.12 | -0.34 | 0.46 | BC000404 | Hs.6566   | PCTK3         | PCTAIRE protein kinase 3                                                              |
| 0.12 | -0.38 | 0.50 | BC013302 | Hs.75564  |               |                                                                                       |
| 0.12 | -0.58 | 0.70 | BC007868 | Hs.334541 | PSMA1         | proteasome (prosome, macropain) subunit, alpha type, 1                                |
| 0.11 | 0.08  | 0.03 | BC018105 | Hs.127241 | CAPNS2        | calpain small subunit 2                                                               |
| 0.11 | -0.69 | 0.80 | BC001380 | Hs.469    | SDHA          | succinate dehydrogenase complex, subunit A, flavoprotein (Fp)                         |
| 0.11 | -0.69 | 0.81 | BC008800 | Hs.99890  | POLD1         | polymerase (DNA directed), delta 1, catalytic subunit 125kDa                          |
| 0.11 | -1.11 | 1.23 | BC000718 | Hs.84153  | PSG4          | pregnancy specific beta-1-glycoprotein 4                                              |
| 0.11 | -0.35 | 0.46 | BC007286 | Hs.120363 | Spir-1        | Spir-1 protein                                                                        |
| 0.11 | -0.56 | 0.67 | BC002857 | Hs.46659  | MUT           | methylmalonyl Coenzyme A mutase                                                       |
| 0.11 | -0.61 | 0.72 | BC009238 | Hs.75318  | MGC1314       | hypothetical protein MGC1314 similar to fucosidase, alpha-L- 1, tissue                |
| 0.11 | -0.43 | 0.54 | BC006281 | Hs.268541 | ZBRK1         | zinc-finger protein ZBRK1                                                             |
| 0.11 | -0.48 | 0.59 | BC021264 | Hs.352211 | ZNF2          | zinc finger protein 2 (A1-5)                                                          |
| 0.11 | 0.08  | 0.03 | BC008215 | Hs.334928 | ARHE          | ras homolog gene family, member E                                                     |
| 0.11 | -0.49 | 0.60 | BC012811 | Hs.198281 | STMN2         | stathmin-like 2                                                                       |
| 0.11 | -0.11 | 0.22 | BC001410 | Hs.417004 | MGC10974      | hypothetical protein MGC10974                                                         |
| 0.11 | -0.17 | 0.28 | BC009302 | Hs.9275   | DKFZP564G0222 | unc-50 related                                                                        |
| 0.11 | -1.08 | 1.19 | BC006769 | Hs.75337  | NOLC1         | nucleolar and coiled-body phosphoprotein 1                                            |
| 0.11 | -0.42 | 0.53 | BC002933 | Hs.283009 | DKFZP547E2110 | anti-silencing function 1A                                                            |
| 0.11 | 0.00  | 0.11 | BC011675 | Hs.26333  | FLJ10074      | hypothetical protein FLJ10074                                                         |
| 0.11 | -0.04 | 0.14 | BC000490 | Hs.7811   | GALE          | galactose-4-epimerase, UDP-                                                           |
| 0.11 | 0.01  | 0.09 | BC006229 | Hs.1342   | COX5B         | cytochrome c oxidase subunit Vb                                                       |
| 0.11 | -1.14 | 1.25 | BC014301 | Hs.433413 | PXMP4         | peroxisomal membrane protein 4, 24kDa                                                 |



|      |       |      |           |                      |                |                                                                                                |
|------|-------|------|-----------|----------------------|----------------|------------------------------------------------------------------------------------------------|
| 0.11 | -0.06 | 0.17 | BC001344  | Hs.237971            | MGC5627        | hypothetical protein MGC5627                                                                   |
| 0.11 | -0.31 | 0.42 | BC009346  | Data not found       | MGC20781       | hypothetical protein MGC20781                                                                  |
| 0.11 | -0.62 | 0.73 | BC005919  | Hs.76422             | EIF3S4         | eukaryotic translation initiation factor 3, subunit 4 delta, 44kDa                             |
| 0.11 | -1.74 | 1.85 | BC001951  | In multiple clusters | MAFG           | v-maf musculoaponeurotic fibrosarcoma oncogene homolog G (avian)                               |
| 0.11 | -0.07 | 0.17 | BC020512  | Hs.374608            | VAMP4          | vesicle-associated membrane protein 4                                                          |
| 0.11 | -2.73 | 2.84 | BC002839  | Hs.153591            | LOC51315       | hypothetical protein LOC51315                                                                  |
| 0.11 | -0.17 | 0.28 | BC015401  | Hs.107968            | HLA-DRB4       | major histocompatibility complex, class II, DR beta 4                                          |
| 0.11 | -0.02 | 0.13 | BC003519  | Data not found       | H2AFY2         | H2A histone family, member Y2                                                                  |
| 0.11 | 0.09  | 0.02 | BC003112  | Hs.902               | ATP1B3         | ATPase, Na <sup>+</sup> /K <sup>+</sup> transporting, beta 3 polypeptide                       |
| 0.10 | -0.76 | 0.87 | BC000120  | Hs.68257             | GLB1           | galactosidase, beta 1                                                                          |
| 0.10 | -0.46 | 0.56 | BC008365  | Hs.43621             | MBC3205        | hypothetical protein MBC3205                                                                   |
| 0.10 | -1.11 | 1.21 | BC015523  | Hs.169907            | TIMM17B        | translocase of inner mitochondrial membrane 17 homolog B (yeast)                               |
| 0.10 | -0.57 | 0.67 | BC018143  | Hs.423615            | IRF3           | interferon regulatory factor 3                                                                 |
| 0.10 | -0.48 | 0.59 | NM_016448 | Hs.126774            | RAMP           | RA-regulated nuclear matrix-associated protein                                                 |
| 0.10 | -0.21 | 0.31 | BC013027  | Hs.83135             | ATF3           | activating transcription factor 3                                                              |
| 0.10 | -0.02 | 0.12 | BC003115  | Hs.8719              | NY-REN-41      | NY-REN-41 antigen                                                                              |
| 0.10 | -0.39 | 0.49 | BC014794  | Hs.99514             | SCAM-1         | vinexin beta (SH3-containing adaptor molecule-1)                                               |
| 0.10 | -0.43 | 0.54 | BC015138  | Hs.381074            | DENR           | density-regulated protein                                                                      |
| 0.10 | -2.35 | 2.45 | BC016956  | Hs.324830            | CYFIP2         | cytoplasmic FMR1 interacting protein 2                                                         |
| 0.10 | -0.92 | 1.02 | BC014372  | Hs.42644             | FLJ10349       | hypothetical protein FLJ10349                                                                  |
| 0.10 | -1.71 | 1.82 | BC003103  | Hs.78748             | 8D6A           | 8D6 antigen                                                                                    |
| 0.10 | -0.90 | 1.00 | BC016845  | Hs.104938            | TMPRSS4        | transmembrane protease, serine 4                                                               |
| 0.10 | 0.04  | 0.06 | BC005298  | Hs.184298            | TNFRSF5        | tumor necrosis factor receptor superfamily, member 5                                           |
| 0.10 | -1.66 | 1.76 | BC013740  | Hs.244378            | ERO1L          | ERO1-like (S. cerevisiae)                                                                      |
| 0.10 | -0.52 | 0.62 | BC018647  | Hs.65238             | MGC3251        | STARD3 N-terminal like                                                                         |
| 0.10 | -0.70 | 0.80 | BC001123  | Hs.279929            | HSGP25L2G      | gp25L2 protein                                                                                 |
| 0.10 | -0.78 | 0.87 | BC002809  | Hs.16697             | SLBP           | stem-loop (histone) binding protein                                                            |
| 0.10 | -0.02 | 0.12 | BC008481  | Hs.296341            | CALM2          | calmodulin 2 (phosphorylase kinase, delta)                                                     |
| 0.10 | -1.43 | 1.53 | BC002866  | Hs.301547            | TTK            | TTK protein kinase                                                                             |
| 0.10 | -1.62 | 1.71 | BC007708  | Hs.113               | BCL2L1         | BCL2-like 1                                                                                    |
| 0.10 | -0.59 | 0.68 | BC020560  | Hs.18616             | ELA3B          | elastase 3B, pancreatic                                                                        |
| 0.10 | -0.66 | 0.75 | BC010122  | Hs.6048              | MRPS2          | mitochondrial ribosomal protein S2                                                             |
| 0.10 | 0.08  | 0.02 | BC002490  | Hs.15093             | HSPC195        | hypothetical protein HSPC195                                                                   |
| 0.10 | -0.48 | 0.58 | BC006240  | Data not found       | CCND1          | cyclin D1 (PRAD1: parathyroid adenomatosis 1)                                                  |
| 0.10 | -1.41 | 1.50 | BC015615  | Data not found       | FH             | fumarate hydratase                                                                             |
| 0.10 | -0.25 | 0.35 | BC013150  | Hs.348334            | CDC20          | CDC20 cell division cycle 20 homolog (S. cerevisiae)                                           |
| 0.10 | -1.06 | 1.15 | BC000180  | Hs.406013            | KRT18          | keratin 18                                                                                     |
| 0.10 | -0.32 | 0.42 | BC016340  | Hs.302754            |                |                                                                                                |
| 0.09 | -0.12 | 0.22 | BC005831  | Hs.2484              | NOL1           | nucleolar protein 1, 120kDa                                                                    |
| 0.09 | -0.16 | 0.25 | BC000611  | Hs.48375             | ZDHHC9         | zinc finger, DHHC domain containing 9                                                          |
| 0.09 | -0.95 | 1.04 | BC011835  | Hs.76941             | NF2            | neurofibromin 2 (bilateral acoustic neuroma)                                                   |
| 0.09 | -1.02 | 1.11 | BC021676  | Hs.160786            | MLLT6          | myeloid/lymphoid or mixed-lineage leukemia (trithorax homolog, Drosophila); translocated to, 6 |
| 0.09 | -0.51 | 0.60 | BC000589  | Hs.279574            | BIRC5          | baculoviral IAP repeat-containing 5 (survivin)                                                 |
| 0.09 | -1.23 | 1.32 | BC015045  | Hs.75641             | PEPD           | peptidase D                                                                                    |
| 0.09 | -0.29 | 0.38 | BC012604  | Hs.27076             | RTCD1          | RTC domain containing 1                                                                        |
| 0.09 | -0.20 | 0.29 | BC005853  | Hs.343236            | MGC2487        | hypothetical protein MGC2487                                                                   |
| 0.09 | -1.22 | 1.31 | BC003388  | Hs.146847            | TANK           | TRAF family member-associated NFKB activator                                                   |
| 0.09 | -0.19 | 0.28 | BC007552  | Data not found       | NA 4-14-03 520 |                                                                                                |
| 0.09 | -0.24 | 0.33 | BC007007  | Hs.83077             | FLJ10468       | hypothetical protein FLJ10468                                                                  |
| 0.09 | -1.14 | 1.23 | BC017498  | Hs.133034            | APEX1          | APEX nuclease (multifunctional DNA repair enzyme) 1                                            |
| 0.09 | -0.02 | 0.11 | BC009256  | Hs.374608            | ANXA5          | annexin A5                                                                                     |
| 0.09 | -1.44 | 1.53 | BC014366  | Hs.65454             | MGC14433       | hypothetical protein MGC14433                                                                  |
| 0.09 | -0.95 | 1.04 | BC008686  | Hs.78221             | ACADVL         | acyl-Coenzyme A dehydrogenase, very long chain                                                 |

|      |       |      |          |                |                |                                                                          |
|------|-------|------|----------|----------------|----------------|--------------------------------------------------------------------------|
| 0.09 | -1.70 | 1.80 | BC003186 | Hs.433180      | VDAC1          | voltage-dependent anion channel 1                                        |
| 0.09 | -0.15 | 0.24 | BC001873 | Hs.234434      | TFG            | TRK-fused gene                                                           |
| 0.09 | -0.01 | 0.10 | BC012603 | Hs.168289      | SDHD           | succinate dehydrogenase complex, subunit D, integral membrane protein    |
| 0.09 | -0.48 | 0.57 | BC015692 | Hs.334668      | MGC13272       | hypothetical protein MGC13272                                            |
| 0.09 | -0.05 | 0.14 | BC021664 | Hs.351306      | NA 4-14-03 376 |                                                                          |
| 0.09 | -0.12 | 0.21 | BC003570 | Hs.66708       | GNB2           | guanine nucleotide binding protein (G protein), beta polypeptide 2       |
| 0.09 | -0.62 | 0.70 | BC009930 | Hs.133968      | PCDHB5         | protocadherin beta 5                                                     |
| 0.09 | -1.15 | 1.24 | BC016058 | Hs.83942       | FLJ20288       | FLJ20288 protein                                                         |
| 0.09 | -0.18 | 0.27 | BC009679 | Hs.11411       | C20orf154      | chromosome 20 open reading frame 154                                     |
| 0.09 | -0.41 | 0.50 | BC009583 | Hs.7917        | HIG1           | likely ortholog of mouse hypoxia induced gene 1                          |
| 0.09 | -1.76 | 1.85 | BC000595 | Hs.349121      | MGC11349       | hypothetical protein MGC11349                                            |
| 0.09 | -0.06 | 0.15 | BC009423 | Data not found | CGBP           | CpG binding protein                                                      |
| 0.09 | -0.85 | 0.94 | BC003547 | Hs.375214      | LOC91862       | similar to RIKEN cDNA 1810006A16 gene                                    |
| 0.09 | -0.32 | 0.41 | BC009642 | Hs.333418      | HSPC002        | HSPC002 protein                                                          |
| 0.09 | -0.58 | 0.67 | BC002403 | Hs.79339       | FLJ20195       | hypothetical protein FLJ20195                                            |
| 0.09 | -0.08 | 0.16 | BC000666 | Hs.279861      | APH2           | Abl-philin 2                                                             |
| 0.09 | -0.27 | 0.35 | BC003641 | Hs.332381      | WASF1          | WAS protein family, member 1                                             |
| 0.09 | -1.00 | 1.09 | BC004560 | Hs.277704      | HNRPA0         | heterogeneous nuclear ribonucleoprotein A0                               |
| 0.09 | -1.44 | 1.53 | BC014109 | Hs.143774      | NPD002         | NPD002 protein                                                           |
| 0.09 | -0.65 | 0.73 | BC002923 | Hs.31968       | LDLR           | low density lipoprotein receptor (familial hypercholesterolemia)         |
| 0.09 | -0.05 | 0.14 | BC013928 | Hs.430150      | HLA-DRB3       | major histocompatibility complex, class II, DR beta 3                    |
| 0.09 | 0.00  | 0.09 | BC000632 | Hs.432009      | ARFGAP3        | ADP-ribosylation factor GTPase activating protein 3                      |
| 0.08 | -0.63 | 0.71 | BC009925 | Hs.405913      | RBM15          | RNA binding motif protein 15                                             |
| 0.08 | -0.80 | 0.89 | BC005250 | Hs.279902      | APG12L         | APG12 autophagy 12-like (S. cerevisiae)                                  |
| 0.08 | -0.40 | 0.49 | BC014900 | Hs.5320        | COPZ1          | CGI-120 protein                                                          |
| 0.08 | -0.11 | 0.20 | BC002931 | Hs.43299       | HSF1           | heat shock transcription factor 1                                        |
| 0.08 | -0.87 | 0.95 | BC009875 | Hs.422118      | SDHD           | succinate dehydrogenase complex, subunit D, integral membrane protein    |
| 0.08 | -0.79 | 0.87 | BC007813 | Hs.417157      | PNLIP          | pancreatic lipase                                                        |
| 0.08 | -1.97 | 2.05 | BC012325 | Hs.15813       | FLN29          | FLN29 gene product                                                       |
| 0.08 | -0.52 | 0.60 | BC003398 | Hs.196437      | C2orf6         | chromosome 2 open reading frame 6                                        |
| 0.08 | -0.80 | 0.88 | BC017205 | Hs.194638      | SKD3           | suppressor of potassium transport defect 3                               |
| 0.08 | -1.05 | 1.13 | BC007317 | Hs.54702       | CPLX1          | complexin 1                                                              |
| 0.08 | -0.93 | 1.02 | BC000336 | Hs.116428      | ZNF219         | zinc finger protein 219                                                  |
| 0.08 | -0.13 | 0.21 | BC012886 | Hs.272822      | RAB6IP1        | RAB6 interacting protein 1                                               |
| 0.08 | -0.01 | 0.09 | BC005930 | Hs.75626       | GPAA1          | GPAA1P anchor attachment protein 1 homolog (yeast)                       |
| 0.08 | -0.72 | 0.80 | BC018272 | Hs.25413       | MIF            | macrophage migration inhibitory factor (glycosylation-inhibiting factor) |
| 0.08 | -0.29 | 0.37 | BC008488 | Hs.401703      | TOLLIP         | Toll-interacting protein                                                 |
| 0.08 | -0.38 | 0.46 | BC004436 | Hs.299629      | MLANA          | melan-A                                                                  |
| 0.08 | 0.03  | 0.05 | BC007848 | Hs.80305       |                | Homo sapiens, clone IMAGE:4620009, mRNA                                  |
| 0.08 | -1.07 | 1.15 | BC001030 | Hs.324874      | TNFRSF9        | tumor necrosis factor receptor superfamily, member 9                     |
| 0.08 | -0.17 | 0.25 | BC012806 | Hs.321579      | PAK4           | p21(CDKN1A)-activated kinase 4                                           |
| 0.08 | 0.00  | 0.08 | BC008794 | Hs.295112      | POM121         | POM121 membrane glycoprotein (rat)                                       |
| 0.08 | -1.36 | 1.44 | BC002432 | Hs.194685      | FLJ12118       | hypothetical protein FLJ12118                                            |
| 0.08 | -0.15 | 0.23 | BC002645 | Hs.302300      | CAVI           | caveolin 1, caveolae protein, 22kDa                                      |
| 0.08 | -0.19 | 0.27 | BC000717 | Hs.119537      | FLJ22318       | hypothetical protein FLJ22318                                            |
| 0.08 | -0.37 | 0.44 | BC007545 | Hs.25197       | RetSDR2        | retinal short-chain dehydrogenase/reductase 2                            |
| 0.08 | -0.65 | 0.73 | BC003607 | Hs.44423       | FLJ20514       | hypothetical protein FLJ20514                                            |
| 0.08 | -0.20 | 0.27 | BC002671 | Hs.2359        | APOC1          | apolipoprotein C-I                                                       |
| 0.08 | -0.30 | 0.37 | BC004952 | Hs.316750      | NR4A1          | nuclear receptor subfamily 4, group A, member 1                          |
| 0.08 | -0.23 | 0.31 | BC007208 | Hs.9822        | LOC120379      | hypothetical protein BC019238                                            |
| 0.08 | -0.12 | 0.20 | BC000335 | Hs.172108      | FLJ21802       | hypothetical protein FLJ21802                                            |
| 0.07 | -0.43 | 0.50 | BC010504 | Hs.26450       | MGC16153       | hypothetical protein MGC16153                                            |
| 0.07 | -0.47 | 0.54 | BC001205 | Data not found | SP2            | Sp2 transcription factor                                                 |

|      |       |      |           |                |                |                                                                                                                       |
|------|-------|------|-----------|----------------|----------------|-----------------------------------------------------------------------------------------------------------------------|
| 0.07 | -0.71 | 0.78 | BC006525  | Hs.267963      | BA108L7.2      | similar to rat tricarboxylate carrier-like protein                                                                    |
| 0.07 | -0.35 | 0.42 | BC013433  | Hs.158196      | AP3S2          | adaptor-related protein complex 3, sigma 2 subunit                                                                    |
| 0.07 | -1.05 | 1.12 | BC004427  | Hs.233952      | MRPL53         | mitochondrial ribosomal protein L53                                                                                   |
| 0.07 | -0.20 | 0.27 | BC014367  | Data not found |                |                                                                                                                       |
| 0.07 | 0.03  | 0.05 | BC017101  | Hs.296380      | HNRPU          | heterogeneous nuclear ribonucleoprotein U (scaffold attachment factor A)                                              |
| 0.07 | -0.21 | 0.29 | BC018931  | Hs.74451       | CAPNS1         | calpain, small subunit 1                                                                                              |
| 0.07 | -0.80 | 0.87 | BC013772  | Hs.73021       | FLJ20345       | hypothetical protein FLJ20345                                                                                         |
| 0.07 | -3.34 | 3.41 | BC012146  | Hs.119598      | NA 4-14-03 294 |                                                                                                                       |
| 0.07 | -0.74 | 0.81 | BC007740  | Hs.247917      | KIAA1228       | KIAA1228 protein                                                                                                      |
| 0.07 | -0.21 | 0.28 | BC010076  | Hs.424751      | LOC115811      | hypothetical protein BC013151                                                                                         |
| 0.07 | 0.01  | 0.06 | BC008078  | Hs.22129       | DJ1042K10.2    | hypothetical protein DJ1042K10.2                                                                                      |
| 0.07 | 0.05  | 0.02 | BC015038  | Hs.66881       | SYT11          | synaptotagmin XI                                                                                                      |
| 0.07 | -1.57 | 1.64 | BC009247  | Hs.74571       | MGC12916       | hypothetical protein MGC12916                                                                                         |
| 0.07 | -0.50 | 0.57 | BC010112  | Hs.79037       | SYN47          | homer homolog 1 (Drosophila)                                                                                          |
| 0.07 | -0.45 | 0.52 | BC006333  | Hs.179703      | KIAA1951       | KIAA1951 protein                                                                                                      |
| 0.07 | -0.46 | 0.53 | BC000319  | Hs.15961       | NA 4-14-03 201 |                                                                                                                       |
| 0.07 | -0.11 | 0.18 | BC009278  | Hs.325520      | POU2F2         | POU domain, class 2, transcription factor 2                                                                           |
| 0.07 | -0.17 | 0.24 | BC015663  | Hs.21858       | MGC16279       | hypothetical protein MGC16279                                                                                         |
| 0.07 | -1.85 | 1.92 | BC014453  | Hs.271411      | MGC15396       | hypothetical protein MGC15396                                                                                         |
| 0.07 | -0.29 | 0.35 | BC012421  | Hs.266902      | FLJ20502       | hypothetical protein FLJ20502                                                                                         |
| 0.07 | -0.01 | 0.08 | BC000942  | Hs.7733        | TTC1           | tetratricopeptide repeat domain 1                                                                                     |
| 0.07 | 0.03  | 0.04 | BC009914  | Hs.3764        | MVD            | mevalonate (diphospho) decarboxylase                                                                                  |
| 0.07 | -0.50 | 0.56 | BC003157  | Hs.95583       | NET-7          | transmembrane 4 superfamily member tetraspan NET-7                                                                    |
| 0.07 | -0.06 | 0.13 | BC016680  | Hs.77031       | SEDL           |                                                                                                                       |
| 0.07 | -1.04 | 1.11 | BC011873  | Hs.70488       | MO25           | MO25 protein                                                                                                          |
| 0.07 | -0.95 | 1.02 | BC021087  | Hs.146332      | P24B           | integral type I protein                                                                                               |
| 0.07 | -1.79 | 1.86 | BC010930  | Hs.423336      | MGC13523       | hypothetical protein MGC13523                                                                                         |
| 0.06 | -1.17 | 1.24 | BC009787  | Hs.31218       | SCAMP1         | secretory carrier membrane protein 1                                                                                  |
| 0.06 | -0.54 | 0.60 | BC003187  | Hs.16085       | ITGB4BP        | integrin beta 4 binding protein                                                                                       |
| 0.06 | -0.61 | 0.68 | BC002480  | Hs.22972       | MGC2562        | Similar to RIKEN cDNA 2810002N01 gene                                                                                 |
| 0.06 | -1.12 | 1.19 | BC021190  | Hs.152531      | DAZAP2         | DAZ associated protein 2                                                                                              |
| 0.06 | 0.02  | 0.05 | BC004889  | Hs.3759        | MGC3040        | hypothetical protein MGC3040                                                                                          |
| 0.06 | -0.32 | 0.39 | BC002758  | Hs.188661      | ZNF9           | zinc finger protein 9 (a cellular retroviral nucleic acid binding protein)                                            |
| 0.06 | -0.83 | 0.89 | BC010923  | Hs.41683       | CART1          | cartilage paired-class homeoprotein 1                                                                                 |
| 0.06 | -1.47 | 1.53 | BC019103  | Hs.406648      | CAPN1          |                                                                                                                       |
| 0.06 | -0.37 | 0.43 | NM_005100 | Hs.788         | TRPV2          | transient receptor potential cation channel, subfamily V, member 2                                                    |
| 0.06 | -0.99 | 1.05 | BC019045  | Hs.98628       | FUBP3          | far upstream element (FUSE) binding protein 3                                                                         |
| 0.06 | 0.03  | 0.04 | BC001689  | Hs.13845       | SLC25A20       | solute carrier family 25 (carnitine/acylcarnitine translocase), member 20                                             |
| 0.06 | -0.30 | 0.36 | BC005991  | Hs.213248      | MGC3232        | hypothetical protein MGC3232                                                                                          |
| 0.06 | -0.39 | 0.45 | BC000048  | Hs.334475      | PAPSS2         | 3'-phosphoadenosine 5'-phosphosulfate synthase 2                                                                      |
| 0.06 | -0.15 | 0.21 | BC017327  | Hs.75260       | FLJ23375       | hypothetical protein FLJ23375                                                                                         |
| 0.06 | -1.33 | 1.39 | BC000371  | Hs.181418      | FLJ20265       | hypothetical protein FLJ20265                                                                                         |
| 0.06 | -0.37 | 0.43 | BC010740  | Hs.15898       | MGC4796        | hypothetical protein MGC4796                                                                                          |
| 0.06 | 0.04  | 0.02 | BC013151  | Hs.254936      | MRPS6          | mitochondrial ribosomal protein S6                                                                                    |
| 0.06 | -0.35 | 0.41 | BC013039  | Hs.83135       | UBE1L          | ubiquitin-activating enzyme E1-like                                                                                   |
| 0.06 | 0.05  | 0.01 | BC007082  | Hs.332848      | LMO4           | LIM domain only 4                                                                                                     |
| 0.06 | -0.19 | 0.25 | BC020571  | Hs.306422      | SERPINF1       | serine (or cysteine) proteinase inhibitor, clade F (alpha-2 antiplasmin, pigment epithelium derived factor), member 1 |
| 0.06 | -0.72 | 0.78 | BC014621  | Hs.75692       | FLJ10439       | hypothetical protein FLJ10439                                                                                         |
| 0.06 | -1.62 | 1.68 | BC021992  | Hs.177574      |                |                                                                                                                       |
| 0.06 | -0.26 | 0.32 | BC013913  | Hs.273077      | SPIB           | Spi-B transcription factor (Spi-1/PU.1 related)                                                                       |
| 0.06 | -0.15 | 0.20 | BC007272  | Hs.380969      | SMAP           | small acidic protein                                                                                                  |
| 0.06 | -0.26 | 0.32 | BC012317  | Hs.149219      | LOC93082       | hypothetical protein BC012317                                                                                         |

|      |       |      |          |                |                |                                                                                     |
|------|-------|------|----------|----------------|----------------|-------------------------------------------------------------------------------------|
| 0.06 | -1.27 | 1.33 | BC022198 | Hs.76719       | VAX2           | ventral anterior homeobox 2                                                         |
| 0.06 | -1.02 | 1.07 | BC009794 | Hs.53973       | VIP            | vasoactive intestinal peptide                                                       |
| 0.05 | -0.13 | 0.18 | BC017713 | Hs.153546      | PCQAP          | PC2 (positive cofactor 2, multiprotein complex) glutamine/Q-rich-associated protein |
| 0.05 | -0.04 | 0.10 | BC005975 | Hs.27258       | DKFZP586I2223  | intermediate filament-like MGC:2625                                                 |
| 0.05 | -0.90 | 0.95 | BC010407 | Hs.227789      | NA 4-14-03 34  |                                                                                     |
| 0.05 | -0.23 | 0.28 | BC016389 | Data not found | SLN            | sarcolipin                                                                          |
| 0.05 | -0.70 | 0.76 | BC011986 | Hs.421646      | ZYX            | zyxin                                                                               |
| 0.05 | -1.49 | 1.55 | BC006221 | Hs.197764      | RAB11A         | RAB11A, member RAS oncogene family                                                  |
| 0.05 | -1.28 | 1.33 | BC009686 | Hs.415877      | PRMT6          | protein arginine N-methyltransferase 6                                              |
| 0.05 | -1.36 | 1.41 | BC012543 | Hs.13144       | ORMDL2         | ORM1-like 2 (S. cerevisiae)                                                         |
| 0.05 | -0.59 | 0.65 | BC020517 | Hs.348389      | NA 4-14-03 474 |                                                                                     |
| 0.05 | -1.94 | 2.00 | BC006146 | Hs.334371      | ASB3           | ankyrin repeat and SOCS box-containing 3                                            |
| 0.05 | -0.96 | 1.01 | BC014077 | Hs.83575       | PRO1580        | hypothetical protein PRO1580                                                        |
| 0.05 | -0.83 | 0.88 | BC000029 | Hs.154846      | C20orf20       | chromosome 20 open reading frame 20                                                 |
| 0.05 | -0.53 | 0.58 | BC000435 | Hs.78614       | DCTD           | dCMP deaminase                                                                      |
| 0.05 | -0.03 | 0.08 | BC015122 | Hs.234489      | RPL9           | ribosomal protein L9                                                                |
| 0.05 | -0.06 | 0.11 | BC002704 | Hs.21486       | TM9SF1         | transmembrane 9 superfamily member 1                                                |
| 0.05 | -0.52 | 0.57 | BC014523 | Data not found | CYFIP1         | cytoplasmic FMR1 interacting protein 1                                              |
| 0.05 | -1.05 | 1.10 | BC016157 | Hs.334721      | FLJ13391       | hypothetical protein FLJ13391                                                       |
| 0.05 | -1.23 | 1.28 | BC014891 | Hs.153293      | KIAA0798       | KIAA0798 gene product                                                               |
| 0.05 | -0.08 | 0.13 | BC010167 | Hs.339834      | CBARA1         | calcium binding atopy-related autoantigen 1                                         |
| 0.05 | -0.13 | 0.18 | BC015491 | Hs.380718      | BOP1           | block of proliferation 1                                                            |
| 0.05 | -1.38 | 1.43 | BC000103 | Hs.101695      | MGC955         | hypothetical protein MGC955                                                         |
| 0.05 | -0.37 | 0.41 | BC006081 | Hs.5807        | FLJ10687       | hypothetical protein FLJ10687                                                       |
| 0.05 | -0.07 | 0.11 | BC000949 | Hs.274350      | BAF53A         | BAF53                                                                               |
| 0.05 | -0.67 | 0.71 | BC007676 | Hs.407995      | MIF            | macrophage migration inhibitory factor (glycosylation-inhibiting factor)            |
| 0.05 | -0.75 | 0.80 | BC004358 | Hs.190161      | MGC20398       | hypothetical protein MGC20398                                                       |
| 0.05 | -0.07 | 0.11 | BC000055 | Hs.433622      | SFRS7          | splicing factor, arginine/serine-rich 7, 35kDa                                      |
| 0.05 | -0.12 | 0.17 | BC018160 | Hs.73946       | C20orf67       | chromosome 20 open reading frame 67                                                 |
| 0.05 | -0.70 | 0.75 | BC016728 | Hs.64595       | RERG           | RAS-like, estrogen-regulated, growth-inhibitor                                      |
| 0.04 | -0.03 | 0.07 | BC008299 | Hs.41502       | MGC24447       | chromosome 14 open reading frame 147                                                |
| 0.04 | -0.96 | 1.01 | BC001169 | Hs.82193       | ITGB3BP        | integrin beta 3 binding protein (beta3-endonexin)                                   |
| 0.04 | -2.45 | 2.50 | BC006472 | Hs.83097       | B4GALT2        | UDP-Gal:betaGlcNAc beta 1,4- galactosyltransferase, polypeptide 2                   |
| 0.04 | -0.44 | 0.48 | BC015842 | Hs.173912      | NUP160         | nucleoporin 160kDa                                                                  |
| 0.04 | -0.08 | 0.12 | BC008500 | Hs.274549      | NA 4-14-03 283 |                                                                                     |
| 0.04 | -0.60 | 0.64 | BC020979 | Hs.42650       | CPB2           | carboxypeptidase B2 (plasma, carboxypeptidase U)                                    |
| 0.04 | -0.18 | 0.22 | BC011856 | Hs.112188      | BCAT2          | branched chain aminotransferase 2, mitochondrial                                    |
| 0.04 | -0.12 | 0.16 | BC013035 | Hs.10018       | MARS           | methionine-tRNA synthetase                                                          |
| 0.04 | -0.20 | 0.24 | BC002725 | Hs.105191      | MADH5          | MAD, mothers against decapentaplegic homolog 5 (Drosophila)                         |
| 0.04 | -1.25 | 1.29 | BC012452 | Hs.288057      | MGC15407       | similar to RIKEN cDNA 4931428D14 gene                                               |
| 0.04 | -0.43 | 0.47 | BC004100 | Hs.177         | METTL1         | methyltransferase-like 1                                                            |
| 0.04 | -0.37 | 0.41 | BC006552 | Hs.29647       | MGC3248        | dynactin 4                                                                          |
| 0.04 | -0.84 | 0.88 | BC013181 | Data not found | LOC51244       | hypothetical protein LOC51244                                                       |
| 0.04 | -0.31 | 0.35 | BC006980 | Hs.39733       | TRIM31         | tripartite motif-containing 31                                                      |
| 0.04 | -0.40 | 0.45 | BC014340 | Hs.348540      | RXRA           | retinoid X receptor, alpha                                                          |
| 0.04 | -0.16 | 0.20 | BC017328 | Hs.12854       | LOC113730      | hypothetical protein BC009980                                                       |
| 0.04 | -0.22 | 0.26 | BC000582 | Hs.178292      | CAPN3          | calpain 3, (p94)                                                                    |
| 0.04 | -0.17 | 0.21 | BC021194 | Hs.575         | FLJ20291       | hypothetical protein FLJ20291                                                       |
| 0.04 | -1.81 | 1.85 | BC013915 | Hs.401787      | CD38           | CD38 antigen (p45)                                                                  |
| 0.04 | -0.06 | 0.10 | BC014545 | Hs.321618      | FLJ12525       | hypothetical protein FLJ12525                                                       |
| 0.04 | -0.30 | 0.34 | BC008835 | Hs.32017       | IVD            | isovaleryl Coenzyme A dehydrogenase                                                 |
| 0.04 | -1.73 | 1.77 | BC007689 | Hs.262958      | DKFZP434B044   | hypothetical protein DKFZp434B044                                                   |
| 0.04 | -0.73 | 0.77 | BC000808 | Hs.129445      | SLC30A5        | solute carrier family 30 (zinc transporter), member 5                               |

|      |       |      |                |                |               |                                                                      |
|------|-------|------|----------------|----------------|---------------|----------------------------------------------------------------------|
| 0.04 | -0.59 | 0.63 | BC009255       | Hs.120824      | NBP           | nucleotide binding protein                                           |
| 0.04 | -1.04 | 1.07 | BC007038       | Hs.79914       | NIP30         | NEFA-interacting nuclear protein NIP30                               |
| 0.04 | -1.03 | 1.06 | BC007312       | Hs.145729      | SRP9          | signal recognition particle 9kDa                                     |
| 0.04 | -0.25 | 0.29 | BC017196       | Hs.104125      | WWP2          | Nedd-4-like ubiquitin-protein ligase                                 |
| 0.04 | -0.29 | 0.32 | BC005234       | Hs.11774       | FLJ22548      |                                                                      |
| 0.04 | -0.07 | 0.11 | BC011875       | Hs.380145      | SLC26A6       | solute carrier family 26, member 6                                   |
| 0.04 | -0.72 | 0.75 | BC012925       | Hs.285681      | EIF3S7        | eukaryotic translation initiation factor 3, subunit 7 zeta, 66/67kDa |
| 0.04 | -0.33 | 0.37 | BC010116       | Hs.343214      | MAT1A         | methionine adenosyltransferase I, alpha                              |
| 0.04 | -0.17 | 0.20 | BC009445       | Data not found | PPP2R5C       | protein phosphatase 2, regulatory subunit B (B56), gamma isoform     |
| 0.04 | -1.57 | 1.61 | BC015514       | Hs.170279      | UQCRCF1       | ubiquinol-cytochrome c reductase, Rieske iron-sulfur polypeptide 1   |
| 0.04 | -0.41 | 0.44 | BC009457       | Hs.182874      | OAI           | ocular albinism 1 (Nettleship-Falls)                                 |
| 0.04 | -0.89 | 0.92 | BC021697       | Hs.90606       | NMT1          | N-myristoyltransferase 1                                             |
| 0.03 | -0.44 | 0.48 | BC000540       | Hs.17936       | FLJ14525      | hypothetical protein FLJ14525                                        |
| 0.03 | -1.56 | 1.59 | BC002952       | Hs.89474       | MY014         | sorting nexin 27                                                     |
| 0.03 | -2.69 | 2.73 | BC001434       | Hs.9061        | MGC2477       | hypothetical protein MGC2477                                         |
| 0.03 | -0.98 | 1.01 | BC008485       | Hs.149176      | GYG           | glycogenin                                                           |
| 0.03 | -0.39 | 0.42 | BC012022       | Hs.80350       | TRAP25        | TRAP/Mediator complex component                                      |
| 0.03 | -0.04 | 0.08 | BC017089       | Hs.105484      | PTD002        | PTD002 protein                                                       |
| 0.03 | -0.58 | 0.61 | BC014879       | Hs.355874      | KLK10         | kallikrein 10                                                        |
| 0.03 | -0.62 | 0.66 | BC009411       | Hs.11039       | FLJ20859      | hypothetical protein FLJ20859                                        |
| 0.03 | -0.19 | 0.22 | BC003020       | Hs.250821      | RPA2          | replication protein A2, 32kDa                                        |
| 0.03 | -0.46 | 0.49 | BC016285       | Hs.87773       | MGC10812      | hypothetical protein MGC10812                                        |
| 0.03 | -0.26 | 0.29 | BC000494       | Hs.170001      |               |                                                                      |
| 0.03 | -0.10 | 0.13 | BC002515       | Hs.74294       | ALDH7A1       | aldehyde dehydrogenase 7 family, member A1                           |
| 0.03 | -1.58 | 1.61 | BC005352       | Hs.17839       | ADIR          | ATP-dependant interferon responsive                                  |
| 0.03 | -0.50 | 0.53 | BC014471       | Hs.274614      | NA 4-14-03 40 |                                                                      |
| 0.03 | -0.58 | 0.61 | Data not found |                | TTRAP         | TRAF and TNF receptor-associated protein                             |
| 0.03 | -2.22 | 2.25 | BC018677       | Hs.425808      | BSCL2         | Bernardinelli-Seip congenital lipodystrophy 2 (seipin)               |
| 0.03 | -0.02 | 0.05 | BC013187       | Hs.77961       | PLSCR3        | phospholipid scramblase 3                                            |
| 0.03 | -0.78 | 0.80 | BC016825       | Hs.16758       | MGC15634      | hypothetical protein MGC15634                                        |
| 0.03 | -0.04 | 0.07 | BC011551       | Hs.13525       | MGC4189       | hypothetical protein MGC4189                                         |
| 0.03 | -1.07 | 1.10 | BC011033       | Hs.264482      | APG12L        | APG12 autophagy 12-like (S. cerevisiae)                              |
| 0.03 | -0.91 | 0.94 | BC005326       | Hs.76064       | AHCYL1        | S-adenosylhomocysteine hydrolase-like 1                              |
| 0.03 | -0.06 | 0.09 | BC015476       | Hs.274317      | FOXA2         | forkhead box A2                                                      |
| 0.03 | -0.80 | 0.82 | BC017377       | Hs.349589      | STXBP1        | syntaxin binding protein 1                                           |
| 0.03 | -0.04 | 0.07 | BC001682       | Hs.323467      | NEUGRN        | mesenchymal stem cell protein DSC92                                  |
| 0.03 | -1.31 | 1.34 | BC014668       | Hs.135150      | MKPX          | mitogen-activated protein kinase phosphatase x                       |
| 0.03 | -0.72 | 0.75 | BC008413       | Hs.292566      | AKR1B1        | aldo-keto reductase family 1, member B1 (aldose reductase)           |
| 0.03 | -1.24 | 1.26 | BC008818       | Hs.78781       | VEGFB         | vascular endothelial growth factor B                                 |
| 0.03 | -0.65 | 0.67 | BC018201       | Data not found | KIAA0354      | KIAA0354 gene product                                                |
| 0.03 | -0.24 | 0.26 | BC008788       | Hs.126704      | FLJ20584      | hypothetical protein FLJ20584                                        |
| 0.02 | -0.61 | 0.63 | BC000616       | Hs.153026      | MGC10731      | hypothetical protein MGC10731                                        |
| 0.02 | -1.97 | 1.99 | BC005003       | Hs.168157      | C15orf15      | chromosome 15 open reading frame 15                                  |
| 0.02 | -0.54 | 0.57 | BC008954       | Hs.25450       | SLC29A1       | solute carrier family 29 (nucleoside transporters), member 1         |
| 0.02 | -0.30 | 0.32 | BC016331       | Hs.284162      | IARS          | isoleucine-tRNA synthetase                                           |
| 0.02 | -0.23 | 0.25 | BC003541       | Hs.279832      | FLJ13855      | hypothetical protein FLJ13855                                        |
| 0.02 | -1.34 | 1.36 | BC000983       | Hs.247280      | C20orf18      | chromosome 20 open reading frame 18                                  |
| 0.02 | -0.13 | 0.15 | BC005961       | Hs.89626       | H105E3        | NAD(P) dependent steroid dehydrogenase-like; H105e3                  |
| 0.02 | -0.94 | 0.97 | BC000251       | Hs.78802       | BAP29         | B-cell receptor-associated protein BAP29                             |
| 0.02 | -0.06 | 0.09 | BC016847       | Hs.1189        | DSCR2         | Down syndrome critical region gene 2                                 |
| 0.02 | -0.01 | 0.03 | BC009538       | Hs.112208      | GLA           | galactosidase, alpha                                                 |
| 0.02 | -0.83 | 0.85 | BC008091       | Data not found | CASP3         | caspase 3, apoptosis-related cysteine protease                       |
| 0.02 | -1.31 | 1.34 | BC016005       | Hs.356547      | ACTG1         | actin, gamma 1                                                       |

|      |       |      |           |                |                |                                                                              |
|------|-------|------|-----------|----------------|----------------|------------------------------------------------------------------------------|
| 0.02 | -0.46 | 0.48 | BC005937  | Hs.267288      | MGC2628        | hypothetical protein MGC2628                                                 |
| 0.02 | -0.31 | 0.33 | BC008502  | Data not found | SDCCAG16       | serologically defined colon cancer antigen 16                                |
| 0.02 | -1.21 | 1.23 | BC009576  | Hs.82159       | PSMA1          | proteasome (prosome, macropain) subunit, alpha type, 1                       |
| 0.02 | -3.30 | 3.32 | BC000544  | Hs.102308      | ENTH           | enthoprotin                                                                  |
| 0.02 | -0.27 | 0.29 | BC015848  | Hs.279061      | PPP1R15B       | protein phosphatase 1, regulatory (inhibitor) subunit 15B                    |
| 0.02 | -1.13 | 1.15 | BC004974  | Hs.111779      | BC002942       | hypothetical protein BC002942                                                |
| 0.02 | -0.90 | 0.92 | BC013413  | Hs.268384      | GARS           | glycyl-tRNA synthetase                                                       |
| 0.02 | -0.40 | 0.42 | BC001000  | Data not found | MGC5363        |                                                                              |
| 0.02 | -1.73 | 1.75 | BC009512  | Hs.334842      | TFPT           | TCF3 (E2A) fusion partner (in childhood Leukemia)                            |
| 0.02 | -0.69 | 0.70 | BC012444  | Hs.25035       | HDCMA18P       | HDCMA18P protein                                                             |
| 0.02 | -0.16 | 0.17 | BC001137  | Hs.306225      | MGC2875        | hypothetical protein MGC2875                                                 |
| 0.02 | -0.35 | 0.36 | BC000542  | Hs.301789      | HOXD3          | homeo box D3                                                                 |
| 0.02 | -0.90 | 0.92 | BC015531  | Hs.250502      |                |                                                                              |
| 0.02 | -1.39 | 1.40 | BC008202  | Hs.55781       | FLJ20604       | hypothetical protein FLJ20604                                                |
| 0.01 | -0.81 | 0.83 | BC011444  | Hs.180141      | CFL2           | cofilin 2 (muscle)                                                           |
| 0.01 | -1.07 | 1.09 | BC004856  | Hs.301760      | PSK-1          | type I transmembrane receptor (seizure-related protein)                      |
| 0.01 | -0.23 | 0.25 | BC005022  | Hs.7905        | PTGES2         | prostaglandin E synthase 2                                                   |
| 0.01 | -0.18 | 0.19 | BC015781  | Hs.405961      | DKFZP434N178   | kinesin family member 26A                                                    |
| 0.01 | -1.35 | 1.36 | BC007122  | Hs.183655      | SEC22A         | SEC22 vesicle trafficking protein-like 2 (S. cerevisiae)                     |
| 0.01 | -0.04 | 0.05 | BC015958  | Hs.172182      | TRIM5          | tripartite motif-containing 5                                                |
| 0.01 | -1.05 | 1.06 | BC013728  | Hs.356386      | PLOD3          | procollagen-lysine, 2-oxoglutarate 5-dioxygenase 3                           |
| 0.01 | -1.46 | 1.47 | BC012196  | Hs.274422      | HEY2           | hair/enhancer-of-split related with YRPW motif 2                             |
| 0.01 | -0.47 | 0.48 | BC000972  | Hs.26333       | JM1            | JM1 protein                                                                  |
| 0.01 | -1.01 | 1.02 | BC016919  | Hs.351335      | HPGD           | hydroxyprostaglandin dehydrogenase 15-(NAD)                                  |
| 0.01 | -0.52 | 0.53 | BC014885  | Hs.301005      | NUBP2          | nucleotide binding protein 2 (MinD homolog, E. coli)                         |
| 0.01 | -0.64 | 0.65 | BC013380  | Hs.426930      | KIAA0212       | KIAA0212 gene product                                                        |
| 0.01 | -0.26 | 0.27 | BC015528  | Hs.9731        | PRO2730        | hypothetical protein PRO2730                                                 |
| 0.01 | -0.51 | 0.52 | BC010914  | Hs.283108      | HBG1           | hemoglobin, gamma A                                                          |
| 0.01 | -0.03 | 0.04 | BC001350  | Hs.172851      | SLC29A2        | solute carrier family 29 (nucleoside transporters), member 2                 |
| 0.01 | -0.54 | 0.55 | BC013101  | Hs.40094       | ARHGEF1        | Rho guanine nucleotide exchange factor (GEF) 1                               |
| 0.01 | -1.09 | 1.11 | BC014861  | Hs.426930      | RPS6KA2        | ribosomal protein S6 kinase, 90kDa, polypeptide 2                            |
| 0.01 | -0.66 | 0.67 | BC000971  | Hs.286049      | PSA            | phosphoserine aminotransferase                                               |
| 0.01 | -0.41 | 0.42 | BC007857  | Hs.180920      | CGI-87         | CGI-87 protein                                                               |
| 0.01 | -0.18 | 0.18 | BC016052  | Hs.102929      | FLJ12089       | hypothetical protein FLJ12089                                                |
| 0.01 | -0.35 | 0.36 | BC015912  | Hs.70877       | ATP6V1G1       | ATPase, H <sup>+</sup> transporting, lysosomal 13kDa, V1 subunit G isoform 1 |
| 0.01 | -0.46 | 0.47 | BC017336  | Data not found | NA 4-14-03 468 |                                                                              |
| 0.01 | -0.71 | 0.72 | BC004399  | Hs.125783      | NA 4-14-03 135 |                                                                              |
| 0.01 | -1.04 | 1.04 | NM_006370 | Hs.169206      | SYNGR3         | synaptogyrin 3                                                               |
| 0.01 | -0.64 | 0.65 | BC009106  | Hs.293650      | KNS2           | kinesin 2 60/70kDa                                                           |
| 0.01 | -0.11 | 0.12 | BC013935  | Data not found | MGC14407       | hypothetical protein MGC14407                                                |
| 0.01 | -1.25 | 1.26 | BC013773  | Hs.184465      | MGC19780       | hypothetical protein MGC19780                                                |
| 0.01 | -0.36 | 0.37 | BC007019  | Hs.6651        | MGC:5244       | hypothetical protein MGC5244                                                 |
| 0.01 | -1.05 | 1.06 | BC006999  | Hs.76038       | ICAP-1A        | integrin cytoplasmic domain-associated protein 1                             |
| 0.01 | -0.37 | 0.38 | BC010951  | Hs.99949       | PIP            | prolactin-induced protein                                                    |
